# Supplementary material for: A cross-sectional study to identify organisational processes associated with nurse-reported quality and patient safety
Source: PubMed Central journal article supplement — BMJ Open. 2012 Dec 21;2(6):e001967. doi: 10.1136/bmjopen-2012-001967 (PMC3533052; doi:10.1136/bmjopen-2012-001967), 2012-12-21
Supplement: bmjopen-2012-001967.draft_revisions.pdf [file bmjopen-2012-001967.draft_revisions.pdf]

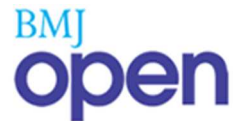

**AN OBSERVATIONAL STUDY TO IDENTIFY  
ORGANIZATIONAL PROCESSES ASSOCIATED WITH NURSE-  
REPORTED QUALITY AND PATIENT SAFETY**

|                                 |                                                                                                                                                                                                                                                                                                                                                                                                                                                               |
|---------------------------------|---------------------------------------------------------------------------------------------------------------------------------------------------------------------------------------------------------------------------------------------------------------------------------------------------------------------------------------------------------------------------------------------------------------------------------------------------------------|
| Journal:                        | <i>BMJ Open</i>                                                                                                                                                                                                                                                                                                                                                                                                                                               |
| Manuscript ID:                  | bmjopen-2012-001967                                                                                                                                                                                                                                                                                                                                                                                                                                           |
| Article Type:                   | Research                                                                                                                                                                                                                                                                                                                                                                                                                                                      |
| Date Submitted by the Author:   | 16-Aug-2012                                                                                                                                                                                                                                                                                                                                                                                                                                                   |
| Complete List of Authors:       | Tvedt, Christine; Norwegian Knowledge Centre for the Health Services, Department of Quality Measurement and Patient Safety; University of Oslo, Institute of Health and Society<br>Sjetne, Ingeborg; Norwegian Knowledge Centre for the Health Services Helgeland, Jon; The Norwegian Knowledge Centre for the Health Services, Department of Quality Measurement and Patient Safety<br>Bukholm, Geir; Østfold Hospital Trust, Centre for Laboratory Medicine |
| <b>Primary Subject Heading</b>: | Health services research                                                                                                                                                                                                                                                                                                                                                                                                                                      |
| Secondary Subject Heading:      | Health services research                                                                                                                                                                                                                                                                                                                                                                                                                                      |
| Keywords:                       | Organisation of health services < HEALTH SERVICES ADMINISTRATION & MANAGEMENT, Quality in health care < HEALTH SERVICES ADMINISTRATION & MANAGEMENT, Health & safety < HEALTH SERVICES ADMINISTRATION & MANAGEMENT                                                                                                                                                                                                                                            |
|                                 |                                                                                                                                                                                                                                                                                                                                                                                                                                                               |

SCHOLARONE™  
Manuscripts

only

**Title:**

**AN OBSERVATIONAL STUDY TO IDENTIFY ORGANIZATIONAL PROCESSES  
ASSOCIATED WITH NURSE-REPORTED QUALITY AND PATIENT SAFETY**

**Corresponding author:**

Name: Christine Tvedt

Postal address: Department of Quality Measurement and Patient Safety, The Norwegian  
Knowledge Centre for the Health Services, Oslo, Norway

Institute of Health and Society, University of Oslo, Norway

PO Box 7004 St. Olavs plass

N-0130 Oslo, Norway

E-mail: cht@nokc.no

Telephone: +47 97 71 55 45

Fax: +47 23 25 50 10

**Co-authors:**

Ingeborg Strømseng Sjetne, Department of Quality Measurement and Patient Safety, The  
Norwegian Knowledge Centre for the Health Services, Oslo, Norway.

Jon Helgeland, Department of Quality Measurement and Patient Safety, The Norwegian  
Knowledge Centre for the Health Services, Oslo, Norway.

Geir Bukholm, Centre for Laboratory Medicine, Østfold Hospital Trust, Fredrikstad, Oslo

**Key-words:**

Patient safety, performance measures, nurses, survey, quality measurement.

**Word count:** 3202

## ABSTRACT

**Objectives:** Health care workers' attitudes and perceptions related to patient safety vary by disciplines within the health care organisations, and nurses constitute a large proportion of health care workers. To target patient safety interventions it is vital to understand how nurses as a microsystem assess organisational structures and processes and relate them to patient safety.

**Design:** The present study is an observational cross-sectional study

**Setting:** The multicenter study is conducted in 35 Norwegian hospitals with more than 85 beds.

**Participants:** All registered nurses working in direct patient care in a position of 20% or more were invited to answer a survey. Through the questionnaire organizational processes were measured by the *Nursing Work Index Revised* and items from *Hospital Survey on Patient Safety Culture*. Organizational structure measures were also included as explanatory variables in the analyses.

**Outcome measures:** Nurses' assessments of patient safety, quality of nursing, how they believe their patients manage after discharge and frequency of adverse events were used as outcome measures.

## Results

1  
2  
3 Active programs to ensure quality, hospital management that encourage patient safety and  
4  
5 having sufficient staff to provide quality of care were consistently related to how nurses  
6  
7 perceive both work- and patient related outcome measures. Nurse physician relationship and  
8  
9 working in a regional hospital gave higher ratings for work-related outcomes. Bed occupancy  
10  
11 and nurse-patient ratio was positively associated with how nurses assessed patient related  
12  
13 outcomes.  
14  
15

### 19 **Conclusion**

20  
21 Organisational structures may have impact on how nurses perceive work- and patient related  
22  
23 outcomes, but the findings in this study indicate that there is a considerable potential to  
24  
25 address organisational design to improve of nurses' assessments of patient safety.  
26  
27  
28  
29  
30  
31  
32  
33  
34  
35  
36  
37  
38  
39  
40  
41  
42  
43  
44  
45  
46  
47  
48  
49  
50  
51  
52  
53  
54  
55  
56  
57  
58  
59  
60

# AN OBSERVATIONAL STUDY TO IDENTIFY ORGANIZATIONAL PROCESSES ASSOCIATED WITH NURSE-REPORTED QUALITY AND PATIENT SAFETY

## Introduction

The report “Crossing the quality chasm” from the Institute of medicine in 2001 called for a system change to improve safety in the health care services<sup>1</sup>. The report led to the establishment of patient safety programmes and health care reforms in many Western countries. The introduction of evidence-based practice, guidelines, performance measurements, and feedback has characterized patient safety initiatives in hospitals during the last decade. However, results from evaluations of these efforts are inconsistent, and several authors have described a need to better understand how organizational features contribute to quality and patient safety in hospitals<sup>2-4</sup>.

The underlying hypothesis of Donabedian’s model for quality is that hospital structures and processes contribute to health care outcomes. There is a growing body of evidence on associations between organizational features and healthcare performance. Physicians’ work environment has been associated with the quality of health service delivery, and improvement of nurses’ work environment could be a cost effective strategy to improve patient outcomes<sup>5-8</sup>. Work environment for nurses has been associated with patient outcomes such as risk-adjusted mortality and patient satisfaction<sup>9-11</sup>. Organizational structures such as hospital size and staff ratios have also been related to patient safety outcomes, but knowledge about how to control for organisational structures when evaluating patient safety and quality interventions is sparse<sup>4,12</sup>.

The inertia of organisational change observed in health care institutions may be explained by an inherence of values and traditions among health care workers that restrain the capacity for

1  
2  
3 transformation<sup>3</sup>. Attitudes and perceptions related to patient safety vary by disciplines and  
4  
5 microsystems, and the planning and implementation of strategies and interventions to improve  
6  
7 patient safety should take such variations into account<sup>13-17</sup>. Information about how individuals  
8  
9 within the microsystems perceive and take advantage of structures and processes in the  
10  
11 organization is vital for the design of patient safe health care institutions<sup>16,18,19</sup>. Donabedian's  
12  
13 recognized approach to explore what is important in modern health care planning serves as  
14  
15 framework for this study. Nurses constitute a large proportion of health care workers, and  
16  
17 how they perceive an organizational design promoting patient safety may provide essential  
18  
19 information about nurses as a microsystem<sup>4,20</sup>. In the present investigation we study how  
20  
21 nurses assess organisational features and relate them to patient safety and quality of nursing.  
22  
23  
24  
25  
26

## 27 **Methods**

### 28 29 30 Design and data collection

31  
32  
33 This observational cross-sectional study involves a survey among nurses in surgical and  
34  
35 medical wards in 35 Norwegian hospitals with more than 85 beds. The data collection was  
36  
37 part of the European RN4Cast study<sup>21</sup>. A paper questionnaire, information letter, and return  
38  
39 envelope were distributed through the nurses' union representatives to 6600 nurses during the  
40  
41 autumn of 2009. Registered nurses working in direct patient care in a position of 20% or more  
42  
43 were included, and nurses on long-term leaves were excluded. Nurses received the  
44  
45 questionnaire at their workplaces, and no personal reminders were distributed. The method of  
46  
47 data collection and handling was approved by the Data Protection Official for Research.  
48  
49  
50  
51  
52  
53  
54  
55  
56  
57  
58  
59  
60

## Nurse-reported outcome measures

The dependent variables were based on nurses' responses to global questions about quality of nursing and patient safety from the questionnaire. The outcomes were divided into two groups of which "work-related" refers to how nurses assess work performance and "patient-related" refers to nurses' assessments of patient outcomes:

- Work-related outcome measures
  - Quality of nursing: In general, how would you describe the quality of nursing care delivered to patients on your unit/ward? (four-point Likert-type scale where 1=poor, 2=fair, 3=good, and 5=excellent)
  - Patient safety: Please give your department an overall grade on patient safety. (5-point Likert-type scale where 1=failing, 2=poor, 3=acceptable, 4=very good, and 5=excellent)
- Patient-related outcome measures
  - Self-care ability: How confident are you that your patients are able to manage their care when discharged? (four-point Likert-type scale where 1=not at all confident, 2=somewhat confident, 3=confident, and 4=very confident)
  - Absence of adverse events: Nurses were also asked to estimate how frequently adverse events have happened to their patients on a seven-point Likert-type scale (1=every day, 2=some times per week, 3=once a week, 4=some times per month, 5=once a month or less, 6=some times per year, 7=never).

In the present study the different types of adverse events in question are summarized in a composite score for absence of nurse-reported adverse events (figure 1).

Figure 1. Types of adverse events assessed by nurses and merged in the composite score “absence of adverse events”

|                                                  |
|--------------------------------------------------|
| Pressure ulcers after admission                  |
| Patient received wrong medication, time, or dose |
| Patient falls with injury                        |
| Urinary tract infections                         |
| Bloodstream infections                           |
| Complaints from patients or their families       |
| Pneumonia                                        |

### Organizational process measures

The nurses’ work environment was measured by the practice environment scale of the *nursing work index revised* (PES-NWI). The instrument has been tested in different cultural contexts, and the Norwegian version of the PES-NWI has been translated and tested according to acknowledged procedures for questionnaire modifications between cultures. We performed an exploratory analysis to identify the factor structure of the Norwegian dataset. The subscales identified were used as explanatory variables in the study. The items were four-point Likert-type scales where 1=strongly disagree, 2=somewhat disagree, 3=somewhat agree, and 4=strongly agree.

In addition to the questions from PES-NWI, we used three items included in the questionnaire *Hospital Survey on Patient Safety Culture* (HSOPSC) developed by The Agency for Healthcare Research and Quality<sup>22</sup>. The items represent leadership topics such as performance feedback and actions showing that patient safety has priority in hospital management. The items were aggregated as a composite score (five-point Likert-type scale: 1=strongly disagree, 2=disagree, 3=neither, 4=agree, 5=strongly agree).



1  
2  
3 Subscales from PES-NWI and the composite score from HSOPSC were defined as  
4  
5 organizational process measures in the present study.  
6  
7

#### 8 9 10 Organizational structure measures

11  
12 Theoretical considerations and the availability of data guided the selection of structure  
13  
14 measures of the organizations. Based upon the results from an expert panel consensus on what  
15  
16 features are important in order to evaluate patient safety interventions, we included variables  
17  
18 that describe hospital type and size, patient clinical complexity, and professional staffing<sup>23</sup>.  
19  
20 All of these are proposed as important control variables in several studies<sup>4,12,24,25</sup>. Structural  
21  
22 characteristics were collected from public registers, reported from hospital administrations on  
23  
24 our request, or aggregated from the RN4Cast-data<sup>26</sup>. “Regional hospitals” was defined as  
25  
26 university hospitals with national responsibilities, while “central hospitals” was defined as  
27  
28 university hospitals without national responsibilities. All other hospitals were defined as  
29  
30 “local hospitals”.  
31  
32  
33  
34

35 The following variables were defined as organizational structure measures:

- 36  
37 • Nurse–patient ratio<sup>27</sup>
- 38  
39 • Physician–patient ratio<sup>27</sup>
- 40  
41 • Index for patient mix<sup>26</sup>
- 42  
43 • Hospital size<sup>26</sup>
- 44  
45 • Hospital type
  - 46  
47 ○ Regional hospital status (versus local)
  - 48  
49 ○ Central hospital (versus local)
- 50  
51 • Bed occupancy (hospital reported)
- 52  
53 • Nurse affiliation to medical department (versus surgical department) (nurse survey)
- 54  
55 • Nurse experience in years per hospital (nurse survey)
- 56  
57  
58  
59  
60

### Statistical analysis

All analyses were made using SPSS version 15.0.

Principal axis factoring with promax rotation was used to identify the factor structure of PES-NWI. Internal consistency was evaluated based on the complete Norwegian data set with nurses in intensive care units, medical wards, and surgical wards (n=5490). Items scoring less than 0.3 were excluded. Correlations were made to compare the results with factor structures identified in other studies.

A reliability test was performed to test the consistency of the HSOPSC composite measure.

Nurses from intensive care units were excluded in the following analyses because the number of these units, the size, and the type of patients admitted vary between hospitals. Based on recommendations for cut points for response rates we included 31 hospitals with a survey response rate above 40%<sup>28</sup>. In these hospitals the questionnaire was distributed to 6147 nurses in medical and surgical wards, and 3618 responded (mean response rate: 58.9%).

Scores of dependent and independent variables were transformed into a 0–100 scale, 0 representing the lowest possible score and 100 the highest possible score. Organizational structure measures were transformed into variables relative to hospital status to control for the assumption of dependency between hospital type and structural variables (in the following marked with “R” in variable names). The transformation was made by subtracting the mean values of hospital type for each case.

Univariate linear regressions were made to study the associations between each explanatory variable and the four outcome measures. This was followed up by stepwise multivariate regression with possible interactions included in the model. Those interactions that remained

significant on a 0.05 level were included in the following analyses. Interactions between hospital type and the other structural variables were related to features of single hospitals, and in the final multivariate regression model we removed these interactions.

The unit of observation was individuals, and nurse characteristics are presented at an individual level. Descriptive statistics of organizational structure and process measures were made on the hospital-aggregated level.

## Results

The structural characteristics of hospitals included in the survey are described in table 1. Most of the hospitals were categorized as local (23), but three hospitals were central hospitals and another five were regional hospitals.

Table 1: Organizational structure measures

| Hospital characteristics                           | Median  | Min.–max.      |
|----------------------------------------------------|---------|----------------|
| Hospital size <sup>1)</sup>                        | 414     | 85–958         |
| Number of patient days                             | 189,461 | 31,000–344,602 |
| Index for patient mix <sup>2)</sup>                | 8.0     | 6.9–11.3       |
| Physician–patient ratio <sup>3)</sup>              | 20.5    | 9.6–38.8       |
| Nurse–patient ratio <sup>4)</sup>                  | 53.3    | 29.9–82.9      |
| Response rate on nurse survey                      | 63.1    | 45.6–85.6      |
| Nurses' work experience per hospital <sup>5)</sup> | 8.6     | 4.1–13.3       |
| Bed occupancy <sup>6)</sup>                        | 87.3    | 75.2 –102.7    |

1) Number of beds 2) The ratio between the number of DRG-points and the number of admissions 3) Number of physician-years per 10,000 patient days 4) Number of nurse-years per 10,000 patient days 5) Mean years of experience among the respondents per hospital 6) Percent, bed occupancy for 2009

The mean age of nurse respondents in the survey was 35.6 (median 33, range 21–71), and their mean experience as nurses was 8.4 (median 5, range 0–45). Most nurses were female (93.8%). All registered nurses in Norway hold a Bachelor's degree, but 15.3% of the respondents had further education. The distribution of nurses between hospital types was

13.6% for central hospital and 29.2% for regional hospital. The distribution between departments was about even, with 56.4% of nurses working in medical departments.

In the exploratory factor analysis six subscales were identified, and two of the items from the original PES-NWI were excluded because Cronbach's alpha was lower than 0.3. Cronbach's alpha ranged from 0.68 to 0.88, with nurse participation in hospital affairs as the lowest and collegial nurse–physician relationship as the highest (see table 2). The items included in each subscale are shown in figure 2 (online only).

Table 2 Cronbach's alphas from principal axis factoring with promax rotation

| Subscales                                   | Number of items | Cronbachs alpha |
|---------------------------------------------|-----------------|-----------------|
| Staff adequacy                              | 3               | 0.80            |
| Nurse physician relation                    | 7               | 0.88            |
| Ward leadership                             | 4               | 0.78            |
| Nursing participation (in hospital affairs) | 5               | 0.68            |
| Education and career (possibilities)        | 4               | 0.73            |
| Quality system                              | 7               | 0.71            |

Pearson's correlations between the principal axis factoring of the Norwegian data and the original factor structure presented by Lake are shown in table 3 (online only)<sup>29</sup>.

Reliability testing of the composite score made by three items from HSOPSC gave a Cronbach's alpha of 0.72.

The respondents' characterizations of organizational process measures aggregated at hospital level are presented in table 4. The lowest scores were obtained for nurse representation of hospital affairs and staff adequacy, while agreement with good nurse–physician relationship and ward leadership was high.

Table 4 Organizational process measures

| <b>Hospital characteristics</b>          | <b>Median</b> | <b>Min.–max.</b> |
|------------------------------------------|---------------|------------------|
| Patient safety management                | 54.6          | 43.5–64.8        |
| Staff adequacy                           | 44.3          | 25.4–61.3        |
| Nurse–physician relation                 | 67.6          | 60.3–76.7        |
| Education and career possibilities       | 48.8          | 33.2–71.2        |
| Quality system                           | 52.5          | 42.5–65.0        |
| Nurse representation in hospital affairs | 38.9          | 29.0–53.1        |
| Ward leadership                          | 61.7          | 50.0–77.8        |

Univariate linear regression showed that, with a few exceptions, organizational structure and process measures were associated with nurses' assessments of quality of nursing, patient safety, self-care ability, and absence of adverse events (see table 5, online only). The explanatory variables and interactions found significant in the stepwise model were analysed in a multivariate model with all main effects of the interactions included (table 6).

Table 6 Association between nurses' assessments of organizational measures and work- and patient-related outcomes

|                    |                                                | Work-related outcomes |                       | Patient-related outcomes |                           |
|--------------------|------------------------------------------------|-----------------------|-----------------------|--------------------------|---------------------------|
|                    |                                                | Quality of nursing    | Patient safety        | Self-care ability        | Absence of adverse events |
|                    |                                                | Coefficient (p-value) | Coefficient (p-value) | Coefficient (p-value)    | Coefficient (p-value)     |
| Process measures   | Patient safety management                      | 0.10 (<0.001)         | 0.20 (<0.001)         | 0.14 (<0.001)            | 0.06 (<0.001)             |
|                    | Staff adequacy                                 | 0.15 (<0.001)         | 0.13 (<0.001)         | 0.12 (<0.001)            | 0.06 (<0.001)             |
|                    | Nurse-physician relation                       | 0.06 (0.001)          | 0.06 (<0.001)         | 0.07 (0.020)             |                           |
|                    | Education and career possibilities             |                       |                       |                          |                           |
|                    | Quality system                                 | 0.25 (<0.001)         | 0.18 (<0.001)         | 0.20 (<0.001)            | 0.10 (<0.001)             |
|                    | Nurse representation in hospital affairs       | -0.05 (0.011)         |                       |                          |                           |
|                    | Ward leadership                                | 0.04 (0.034)          |                       |                          | -0.05 (<0.001)            |
| Structure measures | Central hospital                               |                       |                       |                          | -2.44 (<0.001)            |
|                    | Regional hospital                              | 3.45 (<0.001)         | 2.12 (0.002)          | 1.71 (<0.122)            |                           |
|                    | Nurse-patient ratio-R                          |                       |                       | 0.20 (0.025)             |                           |
|                    | Physician-patient ratio-R                      |                       |                       | -0.26 (0.145)            |                           |
|                    | Bed occupancy-R                                |                       | 0.01 (0.905)          | -0.20 (0.016)            | -0.08 (0.007)             |
|                    | Index for patient mix-R                        | 0.00 (0.994)          |                       | 0.11 (0.212)             |                           |
|                    | Nurse experience-R                             |                       |                       | -0.72 (0.014)            | 0.37 (<0.001)             |
|                    | Hospital size-R                                |                       |                       | -0.02 (0.446)            |                           |
| Interactions       | Medical versus surgical department             | 0.32 (0.572)          | -0.96 (0.033)         | -5.48 (<0.001)           |                           |
|                    | Index for patient mix-R * medical specialty    | 0.12 (0.068)          |                       |                          |                           |
|                    | Nurse-patient ratio-R * nurse experience-R     |                       |                       | 0.17 (<0.001)            |                           |
|                    | Physician-patient ratio-R * nurse experience-R |                       |                       | -0.27 (0.006)            |                           |
|                    | Bed occupancy-R * medical specialty            |                       | -0.11 (0.104)         | -0.11 (0.104)            |                           |

1  
2  
3 Nurses' assessments of work-related outcome measures, quality of nursing, and patient safety,  
4  
5 were associated with four of the organizational process measures; patient safety management,  
6  
7 staff adequacy, nurse–physician relationship, and quality system. We found positive  
8  
9 associations between work-related outcome measures and working in a regional rather than a  
10  
11 local hospital. Nurses affiliated with surgical wards gave higher ratings for patient safety than  
12  
13 nurses working in medical wards.

14  
15  
16  
17 The patient-related outcome measures, self-care ability, and absence of adverse events, were  
18  
19 associated with the organizational process measures patient safety management, staff  
20  
21 adequacy, and quality system. Bed occupancy was negatively associated with patient  
22  
23 outcomes, meaning that lower bed occupancy gave higher (better) ratings for patient  
24  
25 outcomes.

26  
27  
28  
29 Working in a local versus central hospital gave higher ratings for absence of adverse events.  
30  
31 Nurse experience was positively associated with absence of adverse events. We found a  
32  
33 negative but marginal effect of ward leadership.

34  
35  
36 Nurse–physician relationship and nurse–patient ratio were positively associated with self-care  
37  
38 ability, and working in a surgical department gave higher ratings of self-care ability. Nurse  
39  
40 experience-R was negatively associated with self-care ability. The positive effect of nurse–  
41  
42 patient ratio was increased by lower nurse experience. The interaction between physician–  
43  
44 patient ratio and nurse experience gave opposite results. Index for patient mix increased the  
45  
46 effect of working in a surgical department.  
47  
48  
49  
50  
51  
52  
53  
54  
55  
56  
57  
58  
59  
60

## Discussion

### Main findings

Our findings suggest that organizational processes are associated with both work- and patient-related outcome measures. Active programmes to ensure quality (quality system), management that encourage patient safety (patient safety management), and having sufficient staff to provide quality of care (staff adequacy) are consistently related to how nurses perceive patient outcomes, patient safety, and quality of nursing. Nurse–physician relationship was associated with work-related outcome measures and patients’ self-care ability. Working in a regional hospital gave higher ratings for work-related outcomes. For patient-related outcomes the effect of low bed occupancy was significant, and nurse–patient ratio was positively associated with how nurses assessed patients’ self-care ability.

### Principal axis factoring

The exploratory factor analysis of PES-NWI on the Norwegian data specified six subscales that differed slightly from the five-subscale-set identified in previous studies<sup>29</sup>. Principal axis factoring gave no obvious indication on what factor set to prefer, but theoretical considerations made the six-factor-set preferable as it provides a more nuanced description of processes in the work system.

### Nurses perceptions of patient- and work-related outcomes

Our study showed an association between all outcome measures and the subscale quality system, representing topics such as presence of quality control programmes, systems for



1  
2  
3 documentation, continuity of nursing, and training for newly hired. The existence of standards  
4 and quality systems might contribute to expectations and predictability for the organizations  
5 and the health professionals working within them<sup>30</sup>. The presence of routines and  
6  
7 infrastructure related to information technology is critical for adequate documentation and  
8  
9 coordination of care<sup>1,18</sup>. In a study from 1985 Haley found that the presence of an infection  
10  
11 control programme was a cost-effective measure to prevent nosocomial infections<sup>31</sup>, and other  
12  
13 studies have showed that quality programmes influence health care workers attitudes and  
14  
15 increase improvement events<sup>32,33</sup>. Continuity of nursing and nursing versus medical  
16  
17 orientation are elements of the subscale quality system, implying that nursing aspects of  
18  
19 workflow and processes should be addressed.  
20  
21  
22  
23  
24

25  
26 In a review to identify high-performing work systems, internal training programs are  
27  
28 suggested as one of many elements<sup>34</sup>. Having a training programme for newly hired is an  
29  
30 element of the subscale quality system in our study. However, the subscale education and  
31  
32 career development was not associated with outcome measures. This may indicate that  
33  
34 integrated training programmes are more important than nurses's opportunities for individual  
35  
36 professional development and career advancement when it comes to how they perceive  
37  
38 patient safety and quality.  
39  
40  
41

42  
43 The importance of a management that prioritizes patient safety is outlined in several studies  
44  
45 and supported in our findings through the subscale patient safety management involving  
46  
47 discussion and feedback on adverse events and actions showing that patient safety has top  
48  
49 priority<sup>35,36</sup>. Listyowardojo et al. found that physicians rated institutional commitment to  
50  
51 safety more positively than nurses did<sup>14</sup>. A possible explanation is that communication  
52  
53 between hospital management and physicians functions more fluently. In our study patient  
54  
55 safety management was associated with all outcome measures, which underlines the  
56  
57 importance of well-functioning channels to communicate hospital managements' engagement  
58  
59  
60

1  
2  
3 in patient safety to all health care professions. The effects of audits and performance feedback  
4  
5 on process measures have been confirmed in numerous studies, even though the results are  
6  
7 inconsistent<sup>37-40</sup>. It is suggested by Ivers et al. that this depend on how feedback is provided<sup>37</sup>.  
8  
9 Hence, the channels for communicating results from performance measurements and other  
10  
11 patient safety messages should probably be formed by the preferences of the target health care  
12  
13 profession<sup>37</sup>.  
14  
15

16  
17 Collegial discussions are essential to professional development, and communication in  
18  
19 general is an important aspect of workflow and patient safety<sup>41,42</sup>. It is suggested by several  
20  
21 authors that teamwork is fundamental to the administration of workflow<sup>43-45</sup>. When our  
22  
23 findings show that the relationship between nurses and physicians is associated with work-  
24  
25 related outcomes and patients' self-care ability, the association between good nurse-physician  
26  
27 relationships and high-quality of care from other studies is supported<sup>46</sup>.  
28  
29

30  
31 Nurses' perceptions of staff adequacy were significant for all four outcome measures in the  
32  
33 present study. Staff adequacy represents nurses' assessments of the possibility to get the work  
34  
35 done, provide quality of care, and discuss problems related to care with colleagues. The  
36  
37 results are supported by international research suggesting that deployment of resources is  
38  
39 essential to patient safety<sup>47</sup>. Adequate and targeted resource allocation can contribute to  
40  
41 reduced length of stay, increase in ambulatory activity, as well as ensuring right competence  
42  
43 at the right place and time<sup>48</sup>.  
44  
45

46  
47 In the present study nurse-patient ratio was only associated with self-care ability. Bed  
48  
49 occupancy was associated with patient-related outcomes, indicating that workload has an  
50  
51 impact on how nurses evaluate patient outcomes. Associations between staff ratios and patient  
52  
53 outcomes such as failure to rescue, unplanned extubation, cardiac arrest, nosocomial  
54  
55 infections, and risk-adjusted mortality have been found in several studies, indicating that staff  
56  
57  
58  
59  
60

1  
2  
3 levels are related to quality and patient safety<sup>8,11,50-54</sup>. Corresponding results have been shown  
4  
5 in studies with nurse-reported outcome measures<sup>52-54</sup>. In a qualitative study where hospital  
6  
7 employees were invited to suggest patient safety interventions, increased staffing was ranked  
8  
9 as the most important measure<sup>49</sup>. The absence of relationships between nurse staffing and  
10  
11 nurse-reported outcomes in our study may be explained by the high nurse–patient ratios in  
12  
13 Norway compared to other countries. This may indicate that passing a threshold for staff  
14  
15 levels, challenges related to quality, and patient safety could be met on an organizational  
16  
17 level<sup>19,21,56</sup>.

20  
21 In this study we found that nurses assess quality of nursing and patient safety higher in  
22  
23 regional hospitals than in local hospitals, but this was not the case for nurse-assessed patient  
24  
25 outcomes. The gap in results between work- and patient-related outcomes may be explained  
26  
27 by the type of care delivered and risks for complications among patients in regional hospitals.  
28  
29 Even though complications happen more often nurses' perception of quality and safety may  
30  
31 be good. However, associations between hospital type and patient safety indicators are  
32  
33 inconsistently reported by other authors, and it is suggested that features other than hospital  
34  
35 type are more important for patient outcome<sup>12,55</sup>.

### 42 43 Limitations

44  
45  
46 In the present study the survey design involves a risk of common method bias as all variables  
47  
48 were obtained from the same questionnaire. This may have influenced the results, and must be  
49  
50 considered when reading the results. The same caution should be made regarding the small  
51  
52 coefficients produced in our analyses.  
53  
54

55  
56 Methodological questions related to cross-sectional survey design are often addressed towards  
57  
58 the inadequacy to prove causality. However, the intention of our study was not to add proof of  
59  
60

1  
2  
3 this kind, but to describe how nurses' perceptions of work environment were associated with  
4  
5 the outcomes.  
6

7  
8 The questionnaires were distributed through the nurses' union representatives, and the survey  
9  
10 results may have been affected by the distribution method.  
11

## 12 13 14 15 16 Conclusion

17  
18  
19 Organizational structures may have impact on how nurses perceive work- and patient-related  
20  
21 outcomes. However, the organizational processes consistently related to all outcomes  
22  
23 measures, indicate that there is a considerable potential to address organizational design in  
24  
25 improvement of patient safety and quality of care. Our findings contribute to an understanding  
26  
27 of how interventions should be targeted towards nurses as one major microsystem of the  
28  
29 organization.  
30  
31  
32  
33  
34  
35  
36

37 **Ethical approvals:** The method of data collection and handling was approved by the Data  
38  
39 Protection Official for Research  
40

41  
42 **Acknowledgements:** The authors would like to thank all Norwegian nurses that responded  
43  
44 on the nurse survey.  
45

46  
47 **Competing interests:** None  
48

49  
50 **Funding:** Data were collected by Norwegian Nurses' Organisation and Norwegian  
51  
52 Knowledge Centre for the Health Services in collaboration. Christine Tvedt was supported by  
53  
54 a grant from Norwegian Nurses' organisation.  
55  
56  
57  
58  
59  
60

**Data sharing statement:** The data set is available at The Norwegian Knowledge Centre for the Health Services, and requests should be addressed by emailing [cht@nokc.no](mailto:cht@nokc.no)

#### Reference List

- 1 Committee on Quality of Health Care in America. Crossing the quality chasm : a new health system for the 21st century. Washington, D.C.: National Academy Press; 2001.
- 2 Wong Jiahui, Beglaryan Hasmik. Strategies for Hospitals to Improve Patient Safety: A Review of the Research. 2004. The Change Foundation.  
Ref Type: Report
- 3 Leape L, Berwick D, Clancy C et al. Transforming healthcare: a safety imperative. *Qual Saf Health Care* 2009; 18(6):424-428.
- 4 Hearld LR, Alexander JA, Fraser I et al. Review: how do hospital organizational structure and processes affect quality of care?: a critical review of research methods. *Med Care Res Rev* 2008; 65(3):259-299.
- 5 Wallace JE, Lemaire JB, Ghali WA. Physician wellness: a missing quality indicator. *Lancet* 2009; 374(9702):1714-1721.
- 6 Hickam DH, Severance S, Feldstein A et al. The effect of health care working conditions on patient safety. *Evid Rep Technol Assess (Summ )* 2003;(74):1-3.
- 7 Grol R. Changing physicians' competence and performance: finding the balance between the individual and the organization. *J Contin Educ Health Prof* 2002; 22(4):244-251.
- 8 Stone PW, Mooney-Kane C, Larson EL et al. Nurse Working Conditions and Patient Safety Outcomes. *Med Care* 2007; 45(6):571-578.
- 9 Aiken LH, Havens DS, Sloane DM. The Magnet Nursing Services Recognition Program: a comparison of two groups of magnet hospitals. *J Nurs Adm* 2009; 39(7-8 Suppl):S5-14.
- 10 Estabrooks CA, Midodzi WK, Cummings GG et al. The impact of hospital nursing characteristics on 30-day mortality. *Nurs Res* 2005; 54(2):74-84.
- 11 Needleman J, Buerhaus P, Pankratz VS et al. Nurse staffing and inpatient hospital mortality. *N Engl J Med* 2011; 364(11):1037-1045.
- 12 Rivard PE, Elixhauser A, Christiansen CL et al. Testing the association between patient safety indicators and hospital structural characteristics in VA and nonfederal hospitals. *Med Care Res Rev* 2010; 67(3):321-341.
- 13 Westbrook MT, Braithwaite J, Travaglia JF et al.. Promoting safety: longer-term responses of three health professional groups to a safety improvement programme. *Int J Health Care Qual Assur* 2007; 20(7):555-571.
- 14 Listyowardojo TA, Nap RE, Johnson A. Variations in hospital worker perceptions of safety culture. *Int J Qual Health Care* 2012; 24(1):9-15.

- 1
- 2
- 3 15 Gallego B, Westbrook MT, Dunn AG et al. Investigating patient safety culture across a health
- 4 system: multilevel modelling of differences associated with service types and staff
- 5 demographics. *Int J Qual Health Care* 2012.
- 6
- 7 16 Singer SJ, Gaba DM, Falwell A et al. Patient safety climate in 92 US hospitals: differences by
- 8 work area and discipline. *Med Care* 2009; 47(1):23-31.
- 9
- 10 17 Travaglia JF, Westbrook MT, Braithwaite J. Implementation of a patient safety incident
- 11 management system as viewed by doctors, nurses and allied health professionals. *Health*
- 12 *(London)* 2009; 13(3):277-296.
- 13
- 14 18 Battles JB. Quality and safety by design. *Qual Saf Health Care* 2006; 15 Suppl 1:i1-i3.
- 15
- 16 19 Carayon P, Schoofs HA, Karsh BT et al. Work system design for patient safety: the SEIPS
- 17 model. *Qual Saf Health Care* 2006; 15 Suppl 1:i50-i58.
- 18
- 19 20 Donabedian A. An introduction to quality assurance in health care. New York: Oxford
- 20 University Press; 2003.
- 21
- 22 21 Aiken LH, Sermeus W, Van den Heede K et al. Patient safety, satisfaction, and quality of
- 23 hospital care: cross sectional surveys of nurses and patients in 12 countries in Europe and the
- 24 United States. *BMJ* 2012; 344:e1717.
- 25
- 26 22 Blegen MA, Gearhart S, O'Brien R et al. AHRQ's hospital survey on patient safety culture:
- 27 psychometric analyses. *J Patient Saf* 2009; 5(3):139-144.
- 28
- 29 23 Dy SM, Taylor SL, Carr LH et al. A framework for classifying patient safety practices: results
- 30 from an expert consensus process. *BMJ Qual Saf* 2011; 20(7):618-624.
- 31
- 32 24 West E. Management matters: the link between hospital organisation and quality of patient care.
- 33 *Qual Health Care* 2001; 10(1):40-48.
- 34
- 35 25 Taylor SL, Dy S, Foy R et al. What context features might be important determinants of the
- 36 effectiveness of patient safety practice interventions? *BMJ Qual Saf* 2011; 20(7):611-617.
- 37
- 38 26 Huseby,B (red). Specialist health care services 2009 (SAMDATA). 2010. Oslo, The Norwegian
- 39 Directorate of Health. 978.
- 40 Ref Type: Report
- 41
- 42 27 StatBank Norway. Emne: 03 Helse, sosiale forhold og kriminalitet Subject: 03 Health, social
- 43 conditions, social services and crime. <http://statbank.ssb.no/statistikkbanken/> [ 2007 Available
- 44 from: URL:<http://statbank.ssb.no/statistikkbanken/>
- 45
- 46 28 Kramer M, Schmalenberg C, Brewer BB et al. Accurate assessment of clinical nurses' work
- 47 environments: response rate needed. *Res Nurs Health* 2009; 32(2):229-240.
- 48
- 49 29 Lake ET. Development of the practice environment scale of the Nursing Work Index. *Res Nurs*
- 50 *Health* 2002; 25(3):176-188.
- 51
- 52 30 Kohn,L.T, Corrigan JM, Donaldson MSe. To err is human : building a safer health system.
- 53 Washington, D.C.: National Academy Press; 2000.
- 54
- 55 31 Haley RW, Quade D, Freeman HE et al. The SENIC Project. Study on the efficacy of
- 56 nosocomial infection control (SENIC Project). Summary of study design. *Am J Epidemiol* 1980;
- 57 111(5):472-485.
- 58
- 59
- 60

- 1  
2  
3 32 Naveh E, Stem Z. How quality improvement programs can affect general hospital performance. *Int J Health Care Qual Assur Inc Leadersh Health Serv* 2005; 18(4-5):249-270.
- 4  
5  
6 33 Maguerez G, Erbault M, Terra JL et al. Evaluation of 60 continuous quality improvement  
7 projects in French hospitals. *Int J Qual Health Care* 2001; 13(2):89-97.
- 8  
9 34 McAlearney AS, Garman AN, Song PH, et al. High-performance work systems in health care  
10 management, part 2: qualitative evidence from five case studies. *Health Care Manage Rev* 2011;  
11 36(3):214-226.
- 12  
13 35 Goeschel CA, Wachter RM, Pronovost PJ. Responsibility for quality improvement and patient  
14 safety: hospital board and medical staff leadership challenges. *Chest* 2010; 138(1):171-178.
- 15  
16 36 Conway J. Getting boards on board: engaging governing boards in quality and safety. *Jt Comm J*  
17 *Qual Patient Saf* 2008; 34(4):214-220.
- 18  
19 37 Ivers N, Jamtvedt G, Flottorp S et al. Audit and feedback: effects on professional practice and  
20 healthcare outcomes. *Cochrane Database Syst Rev* 2012; 6:CD000259.
- 21  
22 38 Eldridge NE, Woods SS, Bonello RS et al. Using the six sigma process to implement the  
23 Centers for Disease Control and Prevention Guideline for Hand Hygiene in 4 intensive care  
24 units. *J Gen Intern Med* 2006; 21 Suppl 2:S35-S42.
- 25  
26 39 Tvedt C, Bukholm G. Healthcare workers' self-reported effect of an interventional programme  
27 on knowledge and behaviour related to infection control. *Qual Saf Health Care* 2010; 19(6):e7.
- 28  
29 40 Sax H, Allegranzi B, Chraiti MN et al. The World Health Organization hand hygiene  
30 observation method. *Am J Infect Control* 2009; 37(10):827-834.
- 31  
32 41 Quick J. Modern perioperative teamwork: an opportunity for interprofessional learning. *J*  
33 *Perioper Pract* 2011; 21(11):387-390.
- 34  
35 42 West P, Sculli G, Fore A et al. Improving Patient Safety and Optimizing Nursing Teamwork  
36 Using Crew Resource Management Techniques. *J Nurs Adm* 2012; 42(1):15-20.
- 37  
38 43 Manser T. Teamwork and patient safety in dynamic domains of healthcare: a review of the  
39 literature. *Acta Anaesthesiol Scand* 2009; 53(2):143-151.
- 40  
41 44 Auerbach AD, Sehgal NL, Blegen MA et al. Effects of a multicentre teamwork and  
42 communication programme on patient outcomes: results from the Triad for Optimal Patient  
43 Safety (TOPS) project. *BMJ Qual Saf* 2011.
- 44  
45 45 Baker DP, Day R, Salas E. Teamwork as an essential component of high-reliability  
46 organizations. *Health Serv Res* 2006; 41(4 Pt 2):1576-1598.
- 47  
48 46 Schmalenberg C, Kramer M. Nurse-physician relationships in hospitals: 20,000 nurses tell their  
49 story. *Crit Care Nurse* 2009; 29(1):74-83.
- 50  
51 47 Christianson MK, Sutcliffe KM, Miller MA et al. Becoming a high reliability organization. *Crit*  
52 *Care* 2011; 15(6):314.
- 53  
54 48 Allen D, Rixson L. How has the impact of 'care pathway technologies' on service integration in  
55 stroke care been measured and what is the strength of the evidence to support their effectiveness  
56 in this respect? *Int J Evid Based Healthc* 2008; 6(1):78-110.
- 57  
58  
59  
60



- 1  
2  
3 49 Braithwaite J, Westbrook MT, Robinson M et al. Improving patient safety: the comparative  
4 views of patient-safety specialists, workforce staff and managers. *BMJ Qual Saf* 2011;  
5 20(5):424-431.  
6  
7 50 Pronovost P, Needham D, Berenholtz S et al. An intervention to decrease catheter-related  
8 bloodstream infections in the ICU. *N Engl J Med* 2006; 355(26):2725-2732.  
9  
10 51 Kane RL, Shamliyan TA, Mueller C et al. The Association of Registered Nurse Staffing Levels  
11 and Patient Outcomes: Systematic Review and Meta-Analysis. *Med Care* 2007; 45(12):1195-  
12 1204.  
13  
14 52 Tervo-Heikkinen T, Kiviniemi V, Partanen P et al. Nurse staffing levels and nursing outcomes:  
15 a Bayesian analysis of Finnish-registered nurse survey data. *J Nurs Manag* 2009; 17(8):986-993.  
16  
17 53 Djukic M, Kovner CT, Brewer CS et al. Work environment factors other than staffing associated  
18 with nurses' ratings of patient care quality. *Health Care Manage Rev* 2011.  
19  
20 54 Gunnarsdottir S, Clarke SP, Rafferty AM et al. Front-line management, staffing and nurse-  
21 doctor relationships as predictors of nurse and patient outcomes. A survey of Icelandic hospital  
22 nurses. *Int J Nurs Stud* 2007.  
23  
24 55 Sjetne IS, Veenstra M, Stavem K. The effect of hospital size and teaching status on patient  
25 experiences with hospital care: a multilevel analysis. *Med Care* 2007; 45(3):252-258.  
26  
27 56 Shekelle PG, Pronovost PJ, Wachter RM et al. Advancing the science of patient safety. *Ann*  
28 *Intern Med* 2011; 154(10):693-696.  
29  
30  
31  
32  
33  
34  
35  
36  
37  
38  
39  
40  
41  
42  
43  
44  
45  
46  
47  
48  
49  
50  
51  
52  
53  
54  
55  
56  
57  
58  
59  
60



1  
2  
3  
4  
5  
6  
7  
8 Pressure ulcers after admission  
9  
10 Patient received wrong medication, time, or dose  
11  
12 Patient falls with injury  
13  
14 Urinary tract infections  
15  
16 Bloodstream infections  
17  
18 Complaints from patients or their families  
19  
20 Pneumonia  
21  
22  
23

24 96x44mm (150 x 150 DPI)  
25  
26  
27  
28  
29  
30  
31  
32  
33  
34  
35  
36  
37  
38  
39  
40  
41  
42  
43  
44  
45  
46  
47  
48  
49  
50  
51  
52  
53  
54  
55  
56  
57  
58  
59  
60

|                                         |                                                                                                                                                                                                                                                                                                                                                                                                                                                                                                              |
|-----------------------------------------|--------------------------------------------------------------------------------------------------------------------------------------------------------------------------------------------------------------------------------------------------------------------------------------------------------------------------------------------------------------------------------------------------------------------------------------------------------------------------------------------------------------|
| Education and career possibilities      | <p>Career development/clinical ladder opportunity</p> <p>A supervisory staff that is supportive of the nurses</p> <p>Active staff development or continuing education programs for nurses</p> <p>Opportunities for advancement</p>                                                                                                                                                                                                                                                                           |
| Nurse participation in hospital affairs | <p>Opportunity for staff nurses to participate in policy decisions</p> <p>A chief nursing officer who is highly visible and accessible to staff</p> <p>A chief nursing officer equal in power and authority to other top-level hospital executives</p> <p>Staff nurses are involved in the internal governance of the hospital (e.g., practice and policy committees)</p> <p>Staff nurses have the opportunity to serve on hospital and nursing committees</p>                                               |
| Quality system                          | <p>A clear philosophy of nursing that pervades the patient care environment</p> <p>Working with nurses who are clinically competent</p> <p>An active quality assurance program</p> <p>A preceptor program for newly hired RNs</p> <p>Nursing care is based on a nursing, rather than a medical, model</p> <p>Written, up-to-date nursing care plans for all patients</p> <p>Patient care assignments that foster continuity of care, i.e., the same nurse cares for the patient from one day to the next</p> |
| Ward leadership                         | <p>A nurse manager who is a good manager and leader</p> <p>Praise and recognition for a job well done</p> <p>A nurse manager who backs up the nursing staff in decision making, even if the conflict is with a physician</p> <p>Administration that listens and responds to employee concerns</p>                                                                                                                                                                                                            |
| Staff adequacy                          | <p>Enough time and opportunity to discuss patient care problems with other nurses</p> <p>Enough registered nurses to provide quality patient care</p> <p>Enough staff to get the work done</p>                                                                                                                                                                                                                                                                                                               |
| Nurse physician relation                | <p>Physicians and nurses have good working relationships</p> <p>A lot of team work between nurses and physicians</p> <p>Collaboration (joint practice) between nurses and physicians</p> <p>Physicians value nurses' observations and judgments</p> <p>Physicians recognize nurses' contributions to patient care</p> <p>Physicians respect nurses as professionals</p> <p>Physicians hold nurses in high esteem</p>                                                                                         |

260x214mm (150 x 150 DPI)

Table 3 Pearson's correlation between factors identified by principal axis factoring on present data and factors identified by Lake.

|                                            | Staff adequacy | Nurse physician relation | Education and career possibilities | Quality system | Nursing participation in hospital affairs | Ward leadership |
|--------------------------------------------|----------------|--------------------------|------------------------------------|----------------|-------------------------------------------|-----------------|
| Staffing and Resource Adequacy             | 0.95 (<0.001)  | 0.31 (<0.001)            | 0.51 (<0.001)                      | 0.52 (<0.001)  | 0.44 (<0.001)                             | 0.43 (<0.001)   |
| Collegial Nurse-Physician Relations        | 0.29 (<0.001)  | 1.00 (<0.001)            | 0.34 (<0.001)                      | 0.37 (<0.001)  | 0.29 (<0.001)                             | 0.36 (<0.001)   |
| Nurse Manager Ability, Leadership, support | 0.45 (<0.001)  | 0.42 (<0.001)            | 0.62 (<0.001)                      | 0.53 (<0.001)  | 0.48 (<0.001)                             | 0.91 (<0.001)   |
| Nursing Foundations for Quality of Care    | 0.53 (<0.001)  | 0.39 (<0.001)            | 0.67 (<0.001)                      | 0.97 (<0.001)  | 0.55 (<0.001)                             | 0.53 (<0.001)   |
| Nurse Participation in Hospital Affairs    | 0.49 (<0.001)  | 0.34 (<0.001)            | 0.74 (<0.001)                      | 0.58 (<0.001)  | 0.92 (<0.001)                             | 0.65 (<0.001)   |

Table 5 Univariate linear regression (online-only)

|                                          | <b>Quality of nursing</b> | <b>Patient safety</b> | <b>Self-care ability</b> | <b>Absence of adverse events</b> |
|------------------------------------------|---------------------------|-----------------------|--------------------------|----------------------------------|
|                                          | Coefficient (p-value)     | Coefficient (p-value) | Coefficient (p-value)    | Coefficient (p-value)            |
| Patient safety management                | 0.29 (<0.001)             | 0.35 (<0.001)         | 0.30 (<0.001)            | 0.10 (<0.001)                    |
| Adequate staffing                        | 0.29 (<0.001)             | 0.28 (<0.001)         | 0.26 (<0.001)            | 0.10 (<0.001)                    |
| Nurse physician relation                 | 0.22 (<0.001)             | 0.22 (<0.001)         | 0.18 (<0.001)            | 0.06 (<0.001)                    |
| Education and career possibilities       | 0.24 (<0.001)             | 0.23 (<0.001)         | 0.20 (<0.001)            | 0.05 (<0.001)                    |
| Quality system                           | 0.43 (<0.001)             | 0.41 (<0.001)         | 0.40 (<0.001)            | 0.14 (<0.001)                    |
| Nurse representation in hospital affairs | 0.25 (<0.001)             | 0.25 (<0.001)         | 0.23 (<0.001)            | 0.06 (<0.001)                    |
| Ward leadership                          | 0.25 (<0.001)             | 0.25 (<0.001)         | 0.23 (<0.001)            | 0.04 (<0.001)                    |
| Nurse-patient ratio                      | 0.17 (<0.001)             | 0.17 (<0.001)         | 0.29 (<0.001)            | 0.05 (0.013)                     |
| Physician-patient ratio                  | 0.24 (<0.001)             | 0.15 (0.006)          | 0.29 (0.002)             | -0.21 (0.607)                    |
| Central hospital                         | -1.74 (0.045)             | -2.92 (<0.001)        | -0.69 (0.582)            | -2.98 (<0.001)                   |
| Regional hospital                        | 3.92 (<0.001)             | 2.33 (<0.001)         | 4.43 (<0.001)            | -0.28 (0.498)                    |
| Mean occupancy                           | -0.18 (<0.001)            | -0.17 (<0.001)        | -0.16 (<0.001)           | -0.16 (<0.001)                   |
| Index for patient mix                    | 0.17 (<0.001)             | 0.13 (<0.001)         | 0.13 (0.005)             | 0.02 (0.393)                     |
| Mean nurse experience                    | 0.39 (0.005)              | -0.44 (<0.001)        | -0.67 (0.001)            | 0.34 (<0.001)                    |
| Hospital size                            | -0.09 (0.419)             | -0.09 (<0.001)        | -0.11 (<0.001)           | -0.04 (<0.001)                   |
| Medical specialty (vs surgical)          | 1.26 (0.037)              | 0.24 (0.642)          | -4.46 (<0.001)           | -0.14 (0.719)                    |

Figure 2. Items included in factors identified by principal axis factoring

|                                         |                                                                                                                                                                                                                                                                                                                                                                                                                                                                                                              |
|-----------------------------------------|--------------------------------------------------------------------------------------------------------------------------------------------------------------------------------------------------------------------------------------------------------------------------------------------------------------------------------------------------------------------------------------------------------------------------------------------------------------------------------------------------------------|
| Education and career possibilities      | <p>Career development/clinical ladder opportunity</p> <p>A supervisory staff that is supportive of the nurses</p> <p>Active staff development or continuing education programs for nurses</p> <p>Opportunities for advancement</p>                                                                                                                                                                                                                                                                           |
| Nurse participation in hospital affairs | <p>Opportunity for staff nurses to participate in policy decisions</p> <p>A chief nursing officer who is highly visible and accessible to staff</p> <p>A chief nursing officer equal in power and authority to other top-level hospital executives</p> <p>Staff nurses are involved in the internal governance of the hospital (e.g., practice and policy committees)</p> <p>Staff nurses have the opportunity to serve on hospital and nursing committees</p>                                               |
| Quality system                          | <p>A clear philosophy of nursing that pervades the patient care environment</p> <p>Working with nurses who are clinically competent</p> <p>An active quality assurance program</p> <p>A preceptor program for newly hired RNs</p> <p>Nursing care is based on a nursing, rather than a medical, model</p> <p>Written, up-to-date nursing care plans for all patients</p> <p>Patient care assignments that foster continuity of care, i.e., the same nurse cares for the patient from one day to the next</p> |
| Ward leadership                         | <p>A nurse manager who is a good manager and leader</p> <p>Praise and recognition for a job well done</p> <p>A nurse manager who backs up the nursing staff in decision making, even if the conflict is with a physician</p> <p>Administration that listens and responds to employee concerns</p>                                                                                                                                                                                                            |
| Staff adequacy                          | <p>Enough time and opportunity to discuss patient care problems with other nurses</p> <p>Enough registered nurses to provide quality patient care</p> <p>Enough staff to get the work done</p>                                                                                                                                                                                                                                                                                                               |
| Nurse physician relation                | <p>Physicians and nurses have good working relationships</p> <p>A lot of team work between nurses and physicians</p> <p>Collaboration (joint practice) between nurses and physicians</p> <p>Physicians value nurses' observations and judgments</p> <p>Physicians recognize nurses' contributions to patient care</p> <p>Physicians respect nurses as professionals</p> <p>Physicians hold nurses in high esteem</p>                                                                                         |



**AN OBSERVATIONAL STUDY TO IDENTIFY  
ORGANIZATIONAL PROCESSES ASSOCIATED WITH NURSE-  
REPORTED QUALITY AND PATIENT SAFETY**

|                                 |                                                                                                                                                                                                                                                                                                                                                                                                                                                               |
|---------------------------------|---------------------------------------------------------------------------------------------------------------------------------------------------------------------------------------------------------------------------------------------------------------------------------------------------------------------------------------------------------------------------------------------------------------------------------------------------------------|
| Journal:                        | <i>BMJ Open</i>                                                                                                                                                                                                                                                                                                                                                                                                                                               |
| Manuscript ID:                  | bmjopen-2012-001967.R1                                                                                                                                                                                                                                                                                                                                                                                                                                        |
| Article Type:                   | Research                                                                                                                                                                                                                                                                                                                                                                                                                                                      |
| Date Submitted by the Author:   | 20-Oct-2012                                                                                                                                                                                                                                                                                                                                                                                                                                                   |
| Complete List of Authors:       | Tvedt, Christine; Norwegian Knowledge Centre for the Health Services, Department of Quality Measurement and Patient Safety; University of Oslo, Institute of Health and Society<br>Sjetne, Ingeborg; Norwegian Knowledge Centre for the Health Services Helgeland, Jon; The Norwegian Knowledge Centre for the Health Services, Department of Quality Measurement and Patient Safety<br>Bukholm, Geir; Østfold Hospital Trust, Centre for Laboratory Medicine |
| <b>Primary Subject Heading</b>: | Health services research                                                                                                                                                                                                                                                                                                                                                                                                                                      |
| Secondary Subject Heading:      | Health services research                                                                                                                                                                                                                                                                                                                                                                                                                                      |
| Keywords:                       | Organisation of health services < HEALTH SERVICES ADMINISTRATION & MANAGEMENT, Quality in health care < HEALTH SERVICES ADMINISTRATION & MANAGEMENT, Health & safety < HEALTH SERVICES ADMINISTRATION & MANAGEMENT                                                                                                                                                                                                                                            |
|                                 |                                                                                                                                                                                                                                                                                                                                                                                                                                                               |

SCHOLARONE™  
Manuscripts

only

**Title:**

**AN OBSERVATIONAL STUDY TO IDENTIFY ORGANIZATIONAL PROCESSES  
ASSOCIATED WITH NURSE-REPORTED QUALITY AND PATIENT SAFETY**

**Corresponding author:**

Name: Christine Tvedt

Postal address: Department of Quality Measurement and Patient Safety, The Norwegian

Knowledge Centre for the Health Services, Oslo, Norway

Institute of Health and Society, University of Oslo, Oslo, Norway

PO Box 7004 St. Olavs plass

N-0130 Oslo, Norway

E-mail: cht@nokc.no

Telephone: +47 97 71 55 45

Fax: +47 23 25 50 10

**Co-authors:**

Ingeborg Strømseng Sjetne, Department of Quality Measurement and Patient Safety, The  
Norwegian Knowledge Centre for the Health Services, Oslo, Norway.

Jon Helgeland, Department of Quality Measurement and Patient Safety, The Norwegian  
Knowledge Centre for the Health Services, Oslo, Norway.

Geir Bukholm, Centre for Laboratory Medicine, Østfold Hospital Trust, Fredrikstad, Norway  
Institute of Health and Society, University of Oslo, Oslo, Norway

**Key-words:**

Patient safety, performance measures, nurses, survey, quality measurement.

**Word count:** 3788

1  
2  
3 ABSTRACT  
4  
5  
6

7 **Objectives:** The purpose of this study was to identify organisational processes and structures  
8 that are associated with nurse-reported patient safety and quality of nursing. Health care  
9 workers' perceptions related to patient safety vary by disciplines within the health care  
10 organisations, and organizational design promoting patient safety among nurses as a micro  
11 system of hospitals is studied  
12  
13

14 **Design:** This is an observational cross-sectional study using survey methods  
15  
16

17 **Setting:** Respondents from 31 Norwegian hospitals with more than 85 beds were included in  
18 the survey.  
19  
20

21 **Participants:** All registered nurses working in direct patient care in a position of 20 % or  
22 more were invited to answer the survey. In this study 3618 nurses from surgical and medical  
23 wards responded (response rate 58.9). Nurses practice environment was defined as  
24 organisational processes and measured by the *Nursing Work Index Revised* and items from  
25 *Hospital Survey on Patient Safety Culture*.  
26  
27

28 **Outcome measures:** Nurses' assessments of patient safety, quality of nursing, confidence in  
29 how their patients manage after discharge and frequency of adverse events were used as  
30 outcome measures.  
31  
32

33 **Results** *Quality system, nurse-physician relation, patient safety management* and *staff*  
34 *adequacy* were process measures associated with nurse-reported work- and patient- related  
35 outcomes, but we found no associations with *nurse participation, education and career* and  
36 *ward leadership*. Most organisational structures were non-significant in the multilevel model  
37 except for nurses' affiliations to *medical department* and *hospital type*.  
38  
39

40 **Conclusion** Organisational structures may have minor impact on how nurses perceive work-  
41 and patient related outcomes, but the findings in this study indicate that there is a considerable  
42  
43  
44  
45  
46  
47  
48  
49  
50  
51  
52  
53



1  
2  
3 potential to address organizational design in improvement of patient safety and quality of  
4  
5 care.  
6  
7  
8

### 9 10 **Article focus**

- 11  
12 • Identifying organizational processes and structures associated to nurse-reported quality  
13 and patient safety in hospitals
- 14  
15 • Increase knowledge about organizational design promoting patient safety among  
16  
17 nurses as a micro system of hospitals  
18  
19  
20  
21

### 22 23 **Key messages**

- 24  
25 • Organizational processes may have a considerable potential to address organizational  
26  
27 design in improvement of patient safety and quality of care.  
28  
29  
30

### 31 32 **Strengths and limitations**

- 33  
34 • A considerable number of nurses have given their responses on a multicenter nurse  
35  
36 survey providing a valuable data material.  
37  
38
- 39  
40 • Several aspects of the survey method may have influenced the results of this study  
41

## 42 43 **AN OBSERVATIONAL STUDY TO IDENTIFY ORGANIZATIONAL PROCESSES** 44 45 **ASSOCIATED WITH NURSE-REPORTED QUALITY AND PATIENT SAFETY**

### 46 47 **Introduction**

48  
49 The report “Crossing the quality chasm” from the Institute of medicine in 2001 called for a  
50  
51 system change to improve safety in the health care services<sup>1</sup>. The report led to establishment  
52  
53 of patient safety programmes and health care reforms in many Western countries. The  
54  
55 introduction of evidence-based practice, guidelines, performance measurements, and feedback  
56  
57  
58  
59  
60

1  
2  
3 has characterized patient safety initiatives in hospitals during the last decade. Results from  
4  
5 evaluations of the interventional efforts are inconsistent, and several authors have described a  
6  
7 need to better understand how organizational features contribute to quality and patient safety  
8  
9 in hospitals<sup>2-4</sup>. The organizational climate is defined by the employees' perceptions of these  
10  
11 features, and might be understood as structural properties of the organisation and employees'  
12  
13 perceptions of their organisational environment<sup>5</sup>. Both organizational structures (e.g. hospital  
14  
15 size, hospital volume) and organisational processes (e.g. patient safety climate, perception of  
16  
17 work environment) have been associated with safety outcomes<sup>4-6</sup>.  
18  
19

20  
21 The system perspective is based on how input to the health care system is managed and how  
22  
23 this input benefits the patients and society<sup>1</sup>. Donabedian's model for quality serve as a  
24  
25 framework to understand how hospital structures and processes contribute to health care  
26  
27 outcomes and the model is modified by Battle et al to illustrate how processes exist within the  
28  
29 structure of the healthcare system<sup>7-9</sup>. Battles describe how adjustments of organisational  
30  
31 structures and processes may contribute to a reduction of failures that cause adverse events.  
32  
33 An organisational climate where processes and structures allow patient safety improvements  
34  
35 is required to minimize the failures of care<sup>3,9</sup>. Inertia of organizational change observed in  
36  
37 health care institutions is suggested as one explanation for why the "progress of patient safety  
38  
39 improvements has been slow"<sup>3</sup>. A leadership with clear visions and strategies is a key to  
40  
41 transformational change towards a patient safe organization, and knowledge about how health  
42  
43 care workers assess their work environment and patient safety in their work place should  
44  
45 therefore be essential to these leaders<sup>10</sup>.  
46  
47  
48  
49  
50

51  
52 The growing body of evidence on how work environment is associated with healthcare  
53  
54 performance support this view. In studies of physicians' work environment associations with  
55  
56 the quality of health service delivery have been presented and improvement of nurses' work  
57  
58  
59  
60

1  
2  
3 environment is suggested as a cost effective strategy to improve patient outcomes<sup>11-15</sup>.

4  
5 Several studies have presented associations between nurses' work environment and patient  
6  
7 outcomes like adverse events, risk-adjusted mortality and patient satisfaction<sup>15-21</sup>. These are  
8  
9 important studies identifying associations between patient outcome and features of the health  
10  
11 care organisation. However, information about how health care workers take advantage of  
12  
13 processes and structures in the organization is essential for design of patient safe health care  
14  
15 organisations<sup>9,22,23</sup>.

16  
17  
18  
19  
20  
21 Attitudes and perceptions related to patient safety vary by disciplines and micro systems. The  
22  
23 planning and implementation of strategies and interventions to improve patient safety should  
24  
25 take such variations into account<sup>22,24-27</sup>. . Despite the fact that nurse-reported quality of care  
26  
27 have been associated with failure to rescue, patient satisfaction and processes of care, a small  
28  
29 number of studies has explored how nurse-reported patient safety is associated with work  
30  
31 environment<sup>28 29 30-33</sup>.

### 32 33 34 35 36 **Objectives**

37  
38 Nurses constitute a large proportion of health care workers, and how they perceive an  
39  
40 organizational design promoting patient safety is essential information about nurses as a  
41  
42 microsystem<sup>4,8,34</sup>. The purpose of this study was to identify organisational process measures in  
43  
44 nurses' work environment and hospital characteristics (organisational structure measures) that  
45  
46 were associated with nurse-reported patient safety and quality of nursing. In particular, we  
47  
48 were interested in which process measures remained after adjusting for organisational  
49  
50 structure measures.  
51  
52  
53  
54

### 55 56 **Methods** 57 58 59 60

## Design

The theoretical approach of this observational cross sectional study was based on Donabedian's dimensions of a quality model: structure, process and outcome. We modified Battles' version of this model to illustrate how hospital characteristics, nurses' work environment and nurse-reported quality of nursing and patient safety were nested (figure 1). The readers should bear in mind that these variables only represent part of a complex reality.

Figure 1 Modification of the Battles model to illustrate the nested relationship of structure, process and outcome<sup>7</sup>

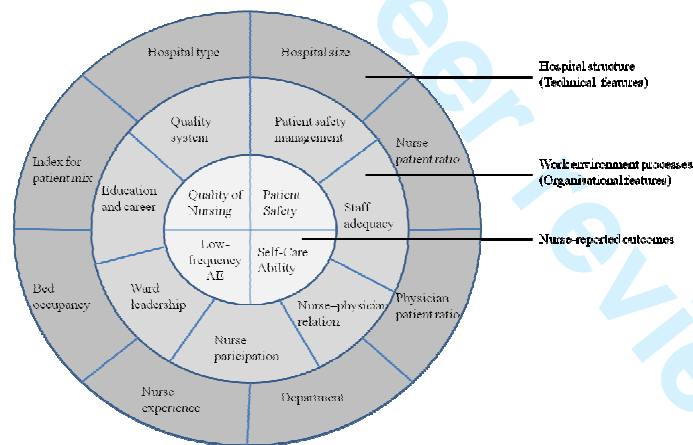

## Data collection

This study involved a survey among nurses in surgical and medical wards in 35 Norwegian hospitals with more than 85 beds. The data collection was part of the European RN4Cast study<sup>11</sup>. A paper questionnaire, information letter, and return envelope were distributed through the nurses' union representatives to 6600 nurses during the autumn of 2009. Registered nurses working in direct patient care in a position of 20% or more were included, and nurses on long-term leaves were excluded. Nurses received the questionnaire at their

workplaces, and the distribution procedures included collection of information about nurses' affiliations to hospital, department and ward. Personal reminders were not distributed as the respondents' names and addresses were not available to the researchers. In some hospital wards the union representatives and/or nurse leaders gave collective reminders. The method of data collection and handling was approved by the Data Protection Official for Research.

#### Nurse-reported outcome measures

The use of self-reported outcomes in this study was necessary to describe how nurses perceived quality of nursing and patient safety at their work places. Single-item overall assessment of quality of nursing and patient safety were used as outcome variables as practiced in other studies investigating nurse-reported quality and patient safety<sup>30-33,35</sup>. We defined the four questions as variables that describe "work-related" referring how nurses report work performance related to patient safety and "patient-related" referring to nurses' reports of patient outcomes:

#### Work-related outcome measures

- Quality of Nursing: In general, how would you describe the quality of nursing care delivered to patients on your unit/ward? (four-point Likert-type scale where 1=poor, 2=fair, 3=good, and 5=excellent, meaning that high scores indicate better quality)
- Patient Safety: Please give your department an overall grade on patient safety. (5-point Likert-type scale where 1=failing, 2=poor, 3=acceptable, 4=very good, and 5=excellent, meaning that high scores indicate better Patient Safety)

#### Patient-related outcome measures

- Self-Care Ability: How confident are you that your patients are able to manage their care when discharged? (four-point Likert-type scale where 1=not at all confident,

2=somewhat confident, 3=confident, and 4=very confident, meaning that high scores indicate more confidence in how patients manage)

- Low Frequent AE: Nurses were also asked to estimate how frequently adverse events have happened to their patients on a seven-point Likert-type scale (1=never, 2=some times per year, 3=once a month or less, 4=some times per month, 5=once a week, 6=some times per week, 7= every day). We recoded the subscale into the opposite direction so that the lowest frequency (Low frequency AE = preferably) made the highest scores.

Different types of adverse events were subjects of the question and in this study we calculated the mean of the seven adverse events scores per nurse:

- Pressure ulcers after admission
- Patients received wrong medication, time or dose
- Patient falls with injury
- Urinary tract infections
- Bloodstream infections
- Complaints from patients or their families
- Pneumonia

Organizational process measures

Nurses' work environment was measured by the instrument *Nursing Work Index* (NWI)<sup>36</sup> and a subscale including items from *The Hospital Survey on Patient Safety Culture* (HSOPSC)<sup>37</sup>.

These subscales were regarded as organizational processes and made the following variables:

- *Education and career*
- *Nurse participation*
- *Quality system*
- *Ward leadership*
- *Staff adequacy*
- *Nurse physician relation*

- *Patient safety management*

. The Norwegian version of NWI has been translated and tested according to acknowledged procedures for questionnaire modifications between cultures<sup>38</sup>. We performed an exploratory analysis to identify the factor structure of the Norwegian dataset. The subscales identified were used as explanatory variables in the study.

The items were four-point Likert-type scales, and high scores indicated agreement that the items were present in the job situation (1=strongly disagree, 2=somewhat disagree, 3=somewhat agree, and 4=strongly agree). The scale scores were calculated as the single items' average for all respondents who had valid scores on at least half of the items included in the scale in question.

Leadership is essential for development of organisational/patient safety culture, and we included three items from the HSOPSC-questionnaire<sup>37,39,40</sup>. The items represent leadership topics such as performance feedback and actions showing that patient safety have priority in hospital management. We regarded a subscale of these items as process measure for the work environment. High scores indicated agreement that the items were present in the job situation (five-point Likert-type scale: 1=strongly disagree, 2=disagree, 3=neither, 4=agree, 5=strongly agree).

#### Organizational structure measures

Information about the hospitals were collected from public registers, reported from hospital administrations on our request, or aggregated from the survey data<sup>41,42</sup>. The following measures were used as organizational structure variables:

- *Nurse-patient ratio* (Number of nurse man-years per 10,000 patient days, 2009)<sup>42</sup>

- 1
- 2
- 3 • *Physician–patient ratio* (Number of physician man-years per 10,000 patient days,
- 4 2009) <sup>42</sup>
- 5
- 6
- 7 • *Index for patient mix* (The ratio between the number of DRG-points and the number of
- 8 admissions, 2009)<sup>41</sup>
- 9
- 10
- 11 • *Hospital size* (Number of beds, 2009)<sup>41</sup>
- 12
- 13
- 14 • *Hospital type* (made as two dummy-variables):
- 15
  - 16 ○ *Regional university hospital* (reference value: local hospital)
  - 17
  - 18 ○ *Local university hospital* (reference value: local hospital)
  - 19
- 20
- 21 • *Bed occupancy* (mean bed occupancy in percent for 2009, hospital reported)
- 22
- 23 • *Medical department* (from the nurse survey: Nurses’ affiliation to medical department
- 24 with reference value: surgical department)
- 25
- 26
- 27 • *Nurse experience* (in years per hospital derived survey data)
- 28
- 29
- 30
- 31
- 32

33 “*Regional university hospitals*” were defined as university hospitals with national  
34 responsibilities, while “*local university hospitals*” were defined as university hospitals  
35 without national responsibilities. All other hospitals were defined as “local hospitals”. We  
36 collected organisational structure measures to ensure validity and comparability for all  
37 hospitals included in the survey. The measures selected for this study was chosen after  
38 considerations of literature discussing the context of patient safety research and practices. To  
39 describe and classify patient safety practices and research hospital type and size, patient  
40 clinical complexity, and professional staffing are suggested as essential structural  
41 features<sup>4,6,43,44 45</sup>.

### 52 **Statistical analysis**

53  
54  
55  
56 All analyses were made using SPSS version 15.0.



1  
2  
3 We used exploratory factor analysis to examine the structure of NWI in the Norwegian  
4 dataset, involving intensive care units, medical and surgical wards (n=5490). We performed  
5 reliability tests to obtain internal consistency for these subscales and for the subscale from  
6 HSOPSC.  
7  
8  
9

10  
11  
12 The questionnaire was distributed to 6147 nurses in medical and surgical wards, and 3618  
13 responded (mean response rate: 58.9%). Based on recommendations for cut points for  
14 response rates we included 31 hospitals with a survey response rate above 40% <sup>46</sup>Nurses from  
15 intensive care units were excluded in the because the number of these units, the size, and the  
16 type of patients admitted vary between hospitals..  
17  
18  
19

20  
21  
22 Scores of outcome and explanatory variables were transformed into a 0–100 scale, 0  
23 representing the lowest possible score and 100 the highest possible score. Organizational  
24 structure variables were transformed into variables relative to *hospital type* to control for the  
25 assumption of dependency with *hospital type* (in the following marked with “R” in variable  
26 names). The transformation was made by subtracting the mean values of *hospital type* for  
27 each case. The unit of observation was individuals. Descriptive statistics of organizational  
28 structure measures were made at hospital-aggregated level.  
29  
30  
31

32  
33  
34 Initially bivariate regression analysis for each organisational variable and each nurse-reported  
35 outcome was performed. In the stepwise multivariate regression that followed, all  
36 organisational variables and all potential interactions were included. Main effects and  
37 interactions that remained significant on a 0.05 level were included in the final multivariate  
38 multilevel regression introducing hospital ward and hospital as level 2 and 3 variables.  
39  
40  
41

42  
43  
44 Interactions between *hospital type* and other structural variables were removed in the final  
45 model because they were related to features of single hospitals.  
46  
47  
48

## 49 50 51 52 53 54 55 56 57 58 59 60

### Results

The exploratory factor analysis identified six subscales from NWI, and internal consistency (Cronbach's alpha) ranged from 0.68 to 0.88 in the reliability test (see table 1). Construction of the subscales and the subscales from PES-NWI<sup>36</sup> are presented in figure 2 (online-only). Internal consistency (Cronbach's alpha) of the three items from HSOPSC was 0.72.

Table 1 Internal consistency (Cronbach's alpha) of subscales from NWI

| Subscales                                   | Number of items | Internal consistency (Cronbach's alpha) |
|---------------------------------------------|-----------------|-----------------------------------------|
| <i>Staff adequacy</i>                       | 3               | 0.80                                    |
| <i>Nurse physician relation</i>             | 7               | 0.88                                    |
| <i>Ward leadership</i>                      | 4               | 0.78                                    |
| <i>Nurse participation</i>                  | 5               | 0.68                                    |
| <i>Education and career (possibilities)</i> | 4               | 0.73                                    |
| <i>Quality system</i>                       | 7               | 0.71                                    |

The structural characteristics of hospitals are described in table 2. Most of the hospitals were categorized as local (23), but three hospitals were *local university hospitals* and another five were *regional university hospitals*.

Table2: Characteristics of the included hospitals (N=31)

| Hospital characteristics                                          | Median | Min.–max.   |
|-------------------------------------------------------------------|--------|-------------|
| <i>Hospital size</i> <sup>1)</sup>                                | 414    | 85–958      |
| <i>Index for patient mix</i> <sup>2)</sup>                        | 8.0    | 6.9–11.3    |
| <i>Physician–patient ratio</i> <sup>3)</sup>                      | 20.5   | 9.6–38.8    |
| <i>Nurse–patient ratio</i> <sup>4)</sup>                          | 53.3   | 29.9–82.9   |
| <i>Nurse experience (no. of years per hospital)</i> <sup>5)</sup> | 8.6    | 4.1–13.3    |
| <i>Bed occupancy</i> <sup>6)</sup>                                | 87.3   | 75.2 –102.7 |

1) Number of beds 2) The ratio between the number of DRG-points and the number of admissions 3) Number of physician-years per 10,000 patient days 4) Number of nurse-years per 10,000 patient days 5) Mean years of experience among the respondents per hospital 6) Percent, bed occupancy for 2009

1  
2  
3  
4  
5  
6  
7  
8  
9 About 90 % of Norwegian nurses are members of NNO, and mean age among these nurses  
10 are 43, 90 % were female. The mean age of nurse respondents (N=3618) in this study was  
11 35.6 (median 33, range 21–71), and their mean experience as nurses was 8.4 (median 5, range  
12 0–45). Most nurses were female (93.8%). All registered nurses in Norway hold a Bachelor's  
13 degree, and 15.3% of the respondents had further education. The distribution of nurses  
14 between *hospital types* was 13.6% for *local university hospital* and 29.2% for *regional*  
15 *university hospital*. The distribution between departments was about even, with 56.4% of  
16 nurses working in medical departments.  
17  
18  
19  
20  
21  
22  
23  
24  
25

26  
27 Organizational process variables are presented in table 3. *Nurse participation* and *staff*  
28 *adequacy* had the lowest scores, while *nurse-physician relation* and *ward leadership* had high  
29 *scores*.  
30  
31  
32  
33  
34  
35

36 Table 3 Nurses' assessment of organizational process measures (N=3618)

| <b>Hospital characteristics</b>  | <b>N</b> | <b>Median</b> | <b>Min.–max.</b> | <b>SD</b> |
|----------------------------------|----------|---------------|------------------|-----------|
| <i>Patient safety management</i> | 3556     | 58.3          | 0-100            | 18.7      |
| <i>Staff adequacy</i>            | 3602     | 44.4          | 0-100            | 22.4      |
| <i>Nurse-physician relation</i>  | 3602     | 66.67         | 0-100            | 15.9      |
| <i>Education and career</i>      | 3603     | 50.0          | 0-100            | 20.5      |
| <i>Quality system</i>            | 3594     | 52.4          | 0-100            | 15.8      |
| <i>Nurse participation</i>       | 3641     | 40.0          | 0-100            | 17.6      |
| <i>Ward leadership</i>           | 3612     | 66.67         | 0-100            | 20.6      |

37  
38  
39  
40  
41  
42  
43  
44  
45  
46  
47  
48 Bivariate linear regression showed that, with a few exceptions, organizational structure and  
49 process measures were associated with nurses' reports of Quality of Nursing, Patient Safety,  
50 Self-Care Ability, and Low frequency AE (see table 4, online only). The final multivariate  
51 multilevel model introducing hospital ward and hospital as level 2 and 3 variables, showed  
52 that almost all variance was found on individual level, and demonstrated that correlation  
53 among observations within the hospitals was lower than for hospital wards (table 5). The  
54 correlation at hospital level accounted for 0.22 % – 0.74 % of the total variance, and  
55 correlation at hospital ward level accounted for 2.46 % – 8.64 % of the total variance (table  
56 5).  
57  
58  
59  
60

Table 5 Multivariate multilevel regression analysis of process/structure measures and nurses' self-reported work- and patient-related outcomes (N=3618)

|                    |                                                       | Work-related outcomes |                       | Patient-related outcomes |                       |
|--------------------|-------------------------------------------------------|-----------------------|-----------------------|--------------------------|-----------------------|
|                    |                                                       | Quality of Nursing    | Patient Safety        | Self-Care Ability        | Low frequency AE      |
|                    |                                                       | Coefficient (p-value) | Coefficient (p-value) | Coefficient (p-value)    | Coefficient (p-value) |
| Process measures   | <i>Patient safety management</i>                      | 0.09<br>(<0.001)      | 0.19<br>(<0.001)      | 0.13<br>(<0.001)         | 0.06<br>(<0.001)      |
|                    | <i>Staff adequacy</i>                                 | 0.12<br>(<0.001)      | 0.12<br>(<0.001)      | 0.10<br>(<0.001)         | 0.04<br>(<0.001)      |
|                    | <i>Nurse-physician relation</i>                       | 0.06<br>(0.003)       | 0.07<br>(<0.001)      | 0.08(0.006)              |                       |
|                    | <i>Education and career</i>                           |                       |                       |                          |                       |
|                    | <i>Quality system</i>                                 | 0.25<br>(<0.001)      | 0.18<br>(<0.001)      | 0.21<br>(<0.001)         | 0.09<br>(<0.001)      |
|                    | <i>Nurse participation</i>                            | -0.04<br>(0.028)      |                       |                          |                       |
|                    | <i>Ward leadership</i>                                | 0.05<br>(0.011)       |                       |                          | -0.03<br>(0.008)      |
| Structure measures | <i>Local university hospital</i>                      |                       |                       |                          | -3.08<br>(0.008)      |
|                    | <i>Regional university hospital</i>                   | 3.57<br>(0.003)       | 1.89<br>(0.024)       | 1.48<br>(<0.375)         |                       |
|                    | <i>Nurse-patient ratio-R</i>                          |                       |                       | 0.21 (0.127)             |                       |
|                    | <i>Physician-patient ratio-R</i>                      |                       |                       | -0.28<br>(0.290)         |                       |
|                    | <i>Bed occupancy-R</i>                                |                       | 0.00<br>(0.955)       | -0.25<br>(0.055)         | -0.09<br>(0.127)      |
|                    | <i>Index for patient mix-R</i>                        | 0.01<br>(0.861)       |                       | 0.10 (0.415)             |                       |
|                    | <i>Nurse experience-R</i>                             |                       |                       | -<br>0.77(0.071)         | 0.33<br>(0.051)       |
|                    | <i>Hospital size-R</i>                                |                       |                       | -0.02<br>(0.533)         |                       |
|                    | <i>Medical department</i>                             | 0.23<br>(0.769)       | -1.12<br>(0.039)      | -5.89<br>(<0.001)        |                       |
| Interactions       | <i>Index for patient mix-R * Medical department</i>   | 0.14<br>(0.114)       |                       | -0.28<br>(0.032)         |                       |
|                    | <i>Nurse-patient ratio-R * nurse experience-R</i>     |                       |                       | 0.16 (0.013)             |                       |
|                    | <i>Physician-patient ratio-R * nurse experience-R</i> |                       |                       | -0.28<br>(0.066)         |                       |
|                    | <i>Bed occupancy-R * Medical department</i>           |                       | -0.10<br>(0.227)      |                          |                       |

|                         |                                       |      |      |      |      |
|-------------------------|---------------------------------------|------|------|------|------|
| Intra class correlation | ICC hospital ward level (2) (percent) | 5.68 | 2.46 | 5.35 | 8.64 |
|                         | ICC hospital level (3) (percent)      | 0.56 | 0,72 | 0.22 | 0.74 |

The multivariate multilevel model showed that nurses' reports of work-related outcome measures; Quality of Nursing, and Patient Safety, were associated with four of the organizational process measures; *patient safety management*, *staff adequacy*, *nurse-physician relation*, and *quality system* (table 5). For Quality of Nursing we found small but significant coefficients of *nurse participation* (negatively) and *ward leadership* (positively). Working in a *regional university hospital* rather than a local hospital was associated with work-related outcome measures. Nurses affiliated to *medical departments* gave lower ratings of Patient Safety than nurses working in surgical departments.

The patient-related outcome measures; Self-Care Ability, and Low frequency AE, were associated with the organizational process measures *patient safety management*, *staff adequacy*, and *quality system*. Self-Care Ability was associated with *Nurse-physician relation* (positively), and Low frequency AE was associated with *ward leadership* (negatively). Nurses working in a *medical department* reported poorer Self-Care Ability. Nurses working a *local university hospital* rather than a local hospital reported higher frequency of adverse events (reduced Low frequency AE). The interactions included in the final model showed that *index for patient mix* reduced the negative effect of *medical department* on Self-Care Ability. High *nurse experience* per hospital increased the effect of *nurse-patient ratio* on Self-Care Ability. Except for *medical department* none of the main effects involved in the interactions were significant.

Low frequency AELow frequency AEDiscussion

Main findings

1  
2  
3 Organisational process variables; *quality system, patient safety management, staff adequacy*  
4 *and nurse-physician relation* were associated with nurse-reported work- and patient- related  
5 outcomes. Not all process variables were associated with the outcomes. The organisational  
6  
7 structure variables *medical department* and *hospital type* were associated with some of the  
8  
9 nurse-reported outcomes.  
10  
11  
12

### 13 14 15 16 17 18 Strengths and limitations 19

20  
21 This study is based on data from one of the largest nurse surveys performed in Norway, and  
22  
23 includes almost all Norwegian hospitals with more than 85 beds. Norwegian nurses give their  
24  
25 workplaces better ratings of work environment and patient safety, and nurse-patient ratios are  
26  
27 higher compared to other countries<sup>11</sup>. The good performance of Norwegian hospitals as  
28  
29 assessed by nurses make it of particular interest to study the organisational design.  
30  
31

32  
33 Questions related to cross-sectional survey design are often addressed towards the inadequacy  
34  
35 to prove causality. However, the intention of our study was not to add evidence of this kind,  
36  
37 but to describe associations between nurses' perceptions of work environment and their  
38  
39 assessments of patient safety and quality of nursing. We have not made statistical controls to  
40  
41 mitigate the risk of common method bias as the value of this is questioned<sup>47-51</sup>. The method  
42  
43 for identifying the five-factor structure of nursing work index has been criticised, but is one of  
44  
45 several ways to identify factor structure<sup>52</sup>. Internal consistency has been tested for both scales,  
46  
47 and was higher for the six-factor structure identified in the present study and provided a  
48  
49 nuanced description of work environment adapted to a Norwegian context<sup>36 38</sup>. The  
50  
51 questionnaires were distributed through the nurses' union representatives, and we have not  
52  
53 been able to control whether perspectives of NNO have influenced the results. The sample of  
54  
55 this study is a relevant population with a response rate of 58.9%, and the age distribution is  
56  
57  
58  
59  
60

1  
2  
3 corresponding with studies of similar populations from Norway<sup>53</sup>. The difference in age from  
4  
5 nurses in the NNO database may be explained by exclusion of nurses in leader positions and  
6  
7 part-time positions. Nurses' practice environments are complex and cannot be fully covered  
8  
9 by a questionnaire, but overall the nursing work index is characterised as a "promising  
10  
11 instrument"<sup>52,54</sup>. However, NWI is developed to evaluate nurse-reported job outcomes, and  
12  
13 the applicability of the instrument to patient safety outcome might be uncertain<sup>55</sup>. Statistics  
14  
15 Norway and The Norwegian Directorate of Health are well-established registers with  
16  
17 complete coverage. The high quality of their data collection has minimized the risk of  
18  
19 inaccuracy of organisational structure variables and ensured the comparability between  
20  
21 hospitals.  
22  
23

#### 24 25 26 Organisational process measures

27  
28  
29 Educational level has been associated with risk-adjusted patient mortality and failure to rescue  
30  
31 within 30 days of admission<sup>56,57</sup>. Even though all Norwegian nurses hold a bachelor degree,  
32  
33 we expected that *education and career* was associated with some of the outcome measures,  
34  
35 but this was not the case. However, the association between *quality system*, involving issues  
36  
37 as training for newly hired and continuity of nursing, and work- and patient- related outcomes  
38  
39 indicate that integrated training programmes are more important for patient safety and quality  
40  
41 of nursing<sup>57</sup>. The subscale *quality system* also represents continuous processes such as  
42  
43 presence of quality control programmes, systems for documentation, and nursing versus  
44  
45 medical orientation. These findings are supported in studies showing that quality programmes  
46  
47 influence health care workers attitudes and increase improvement events<sup>58-61</sup>. The existence of  
48  
49 standards, infrastructure and quality systems contribute to expectations and predictability for  
50  
51 the health professionals and maximize their efforts to avoid patient harm<sup>1,9,62</sup>.  
52  
53  
54

55  
56 The impact of nurse leadership and a management that prioritizes patient safety has been  
57  
58 emphasised in several studies<sup>10,40 63,64</sup>. *Ward leadership* was inconsistently associated with  
59  
60



1  
2  
3 the outcomes in this study, but the leadership aspect was supported by the subscale *patient*  
4 *safety management*. In a recent study the authors found that engaged leadership strengthened  
5 both communication and teamwork and that these qualities of the organisation enhanced  
6 patient safety<sup>65</sup>. Communication and collegial discussions are important aspects to streamline  
7 workflow and procedures to ensure patient safety, and serve as sources for professional  
8 development<sup>66,67</sup>. The association between good nurse-physician relation and high quality of  
9 care from other studies was supported in our findings<sup>68-71</sup>. The channels for communicating  
10 results from performance measurements and other patient safety messages require  
11 engagement from leaders on all levels, and should probably be formed by the preferences of  
12 the targeted health care profession.  
13  
14  
15  
16  
17  
18  
19  
20  
21  
22  
23  
24  
25  
26  
27  
28

29 *Staff adequacy* represent nurses' assessments of the possibility to get the work done, provide  
30 quality of care, and discuss problems related to care with colleagues Processes that ensure  
31 adequate and targeted resource allocation may contribute to reduced length of stay, increase in  
32 ambulatory activity, as well as ensuring right competence at the right place and time<sup>72 73</sup>.  
33 Associations between staff ratios and patient outcomes such as failure to rescue, unplanned  
34 extubation, cardiac arrest, nosocomial infections, and risk-adjusted mortality have been found  
35 in several studies, indicating that staff levels are related to quality and patient safety<sup>15,19,21,74-</sup>  
36 <sup>77</sup>. Corresponding results have been shown in studies with nurse-reported outcome measures,  
37 but was not confirmed by our study<sup>75-77</sup>. A possible reason for this is that nurse-patient ratios  
38 are high in Norway and that Norwegian nurses perceive work environment better than nurses  
39 in other countries<sup>11</sup>. This may indicate that passing a threshold for staff levels, challenges  
40 related to quality, and patient safety could be met on an organizational level<sup>11,23,78</sup>. .  
41  
42  
43  
44  
45  
46  
47  
48  
49  
50  
51  
52  
53  
54  
55  
56  
57  
58  
59  
60



1  
2  
3 Organisational structure measures  
4

5  
6 Most of the organizational structures were not significantly associated with outcome variables  
7  
8 when hospital and hospital ward was introduced as levels in the analysis. Hence, when  
9  
10 affiliation to regional university hospitals remained significant, it may as well be explained by  
11  
12 a strong common perception of the hospital performance as of *hospital type*. *Regional*  
13  
14 *university hospital* was not associated with nurse-reported patient-related outcomes implying  
15  
16 that nurses' perception of quality and safety may be good despite the risk for complications  
17  
18 among patients in these hospitals. Associations between hospital type and patient safety  
19  
20 indicators are inconsistently reported by other authors that suggest that features other than  
21  
22 hospital type are more important for patient outcomes<sup>6,79,80</sup>  
23  
24

25  
26 The negative association between Low frequency AE and *local university hospital* might  
27  
28 confirm the assumption that common perception is a more decisive factor than hospital type.  
29  
30 However, because of the small number of hospitals in this group, conditions in a single  
31  
32 hospital might have influenced the results. Correlation on hospital and hospital ward levels  
33  
34 were highest for Low frequency AE, indicating a stronger correlation for this outcome on  
35  
36 these levels, and we cannot rule out that our findings are related to resources, patients'  
37  
38 severity and nurses' perceptions of risk of complications<sup>6</sup>. We found that nurses working in  
39  
40 *medical departments* gave poorer ratings of patients' self care ability and that *medical*  
41  
42 *department* interacted with *index for patient mix*. We lack information about patients' severity  
43  
44 and DRG-weights on departmental level, but the complexity in diseases and comorbidity  
45  
46 among elderly patients' may explain this result if the majority of them are admitted to medical  
47  
48 departments. These consideration do not explain why being affiliated to a *medical department*  
49  
50 was associated with nurse-reported Patient safety, but may indicate that patient safety  
51  
52 interventions are easier to apply and make visible in surgical departments as the procedures  
53  
54 are more standardized<sup>81</sup>.  
55  
56  
57  
58  
59  
60

1  
2  
3 Final remarks  
4  
5

6 The agreement of respondents within organisational levels (ICCs) was in accordance with  
7  
8 similar studies reviewed by Park and Lake<sup>82</sup>. The culture of a group is formed by shared  
9  
10 perceptions, thoughts and emotions, and a natural consequence is that the strongest correlation  
11  
12 of nurses' assessments of organisational process variables was found at individual and  
13  
14 hospital ward level<sup>39</sup>. We conclude that organizational structure variables included in our  
15  
16 study have minor impact on how nurses perceive work- and patient-related outcomes.  
17

18  
19 However, the organizational process variables consistently related to all outcomes measures  
20  
21 indicated that there is a considerable potential to address organizational design in  
22  
23 improvement of patient safety and quality of care. This study makes a contribution to  
24  
25 knowledge about how interventions should be targeted towards nurses as one major micro  
26  
27 system of the organization. Further research should also address organisational processes  
28  
29 relevant for other professions.  
30  
31

32  
33 **Ethical approvals:** The method of data collection and handling was approved by the Data  
34  
35 Protection Official for Research  
36

37  
38  
39 **Acknowledgements:** The authors would like to thank all Norwegian nurses that responded  
40  
41 on the nurse survey.  
42

43  
44 **Competing interests:** None  
45

46  
47 **Funding:** Data were collected by Norwegian Nurses' Organisation and Norwegian  
48  
49 Knowledge Centre for the Health Services in collaboration. Christine Tvedt was supported by  
50  
51 a grant from Norwegian Nurses' organisation.  
52

53  
54  
55 **Data sharing statement:** The data set is available at The Norwegian Knowledge Centre for  
56  
57 the Health Services, and requests should be addressed by emailing [cht@nokc.no](mailto:cht@nokc.no)  
58  
59

## Reference List

- 1 Committee on Quality of Health Care in America. Crossing the quality chasm : a new health system for the 21st century. Washington, D.C.: National Academy Press; 2001.
- 2 Wong Jiahui, Beglaryan Hasmik. Strategies for Hospitals to Improve Patient Safety: A Review of the Research. 2004. The Change Foundation.  
Ref Type: Report
- 3 Leape L, Berwick D, Clancy C et al. Transforming healthcare: a safety imperative. *Qual Saf Health Care* 2009; 18(6):424-428.
- 4 Hearld LR, Alexander JA, Fraser I et al. Review: how do hospital organizational structure and processes affect quality of care?: a critical review of research methods. *Med Care Res Rev* 2008; 65(3):259-299.
- 5 Zohar D. Thirty years of safety climate research: reflections and future directions. *Accid Anal Prev* 2010; 42(5):1517-1522.
- 6 Rivard PE, Elixhauser A, Christiansen CL et al. Testing the association between patient safety indicators and hospital structural characteristics in VA and nonfederal hospitals. *Med Care Res Rev* 2010; 67(3):321-341.
- 7 Battles JB, Lilford RJ. Organizing patient safety research to identify risks and hazards. *Qual Saf Health Care* 2003; 12 Suppl 2:ii2-ii7.
- 8 Donabedian A. An introduction to quality assurance in health care. New York: Oxford University Press; 2003.
- 9 Battles JB. Quality and safety by design. *Qual Saf Health Care* 2006; 15 Suppl 1:i1-i3.
- 10 Cummings G. The call for leadership to influence patient outcomes. *Nurs Leadersh (Tor Ont )* 2011; 24(2):22-25.
- 11 Aiken LH, Sermeus W, Van den Heede K et al. Patient safety, satisfaction, and quality of hospital care: cross sectional surveys of nurses and patients in 12 countries in Europe and the United States. *BMJ* 2012; 344:e1717.
- 12 Wallace JE, Lemaire JB, Ghali WA. Physician wellness: a missing quality indicator. *Lancet* 2009; 374(9702):1714-1721.
- 13 Hickam DH, Severance S, Feldstein A et al. The effect of health care working conditions on patient safety. *Evid Rep Technol Assess (Summ )* 2003;(74):1-3.
- 14 Grol R. Changing physicians' competence and performance: finding the balance between the individual and the organization. *J Contin Educ Health Prof* 2002; 22(4):244-251.

- 15 Stone PW, Mooney-Kane C, Larson EL et al. Nurse Working Conditions and Patient Safety Outcomes. *Med Care* 2007; 45(6):571-578.
- 16 Cummings GG, Midodzi WK, Wong CA et al. The contribution of hospital nursing leadership styles to 30-day patient mortality. *Nurs Res* 2010; 59(5):331-339.
- 17 Aiken LH, Clarke SP, Sloane DM et al. Effects of hospital care environment on patient mortality and nurse outcomes. *J Nurs Adm* 2008; 39(7-8 Suppl):S45-S51.
- 18 Estabrooks CA, Midodzi WK, Cummings GG et al. The impact of hospital nursing characteristics on 30-day mortality. *Nurs Res* 2005; 54(2):74-84.
- 19 Needleman J, Buerhaus P, Pankratz VS et al. Nurse staffing and inpatient hospital mortality. *N Engl J Med* 2011; 364(11):1037-1045.
- 20 Blegen MA, Goode CJ, Reed L. Nurse staffing and patient outcomes. *Nurs Res* 1998; 47(1):43-50.
- 21 Kane RL, Shamliyan TA, Mueller C et al. The Association of Registered Nurse Staffing Levels and Patient Outcomes: Systematic Review and Meta-Analysis. *Med Care* 2007; 45(12):1195-1204.
- 22 Singer SJ, Gaba DM, Falwell A et al. Patient safety climate in 92 US hospitals: differences by work area and discipline. *Med Care* 2009; 47(1):23-31.
- 23 Carayon P, Schoofs HA, Karsh BT et al. Work system design for patient safety: the SEIPS model. *Qual Saf Health Care* 2006; 15 Suppl 1:i50-i58.
- 24 Westbrook MT, Braithwaite J, Travaglia JF et al. Promoting safety: longer-term responses of three health professional groups to a safety improvement programme. *Int J Health Care Qual Assur* 2007; 20(7):555-571.
- 25 Listyowardojo TA, Nap RE, Johnson A. Variations in hospital worker perceptions of safety culture. *Int J Qual Health Care* 2012; 24(1):9-15.
- 26 Gallego B, Westbrook MT, Dunn AG et al. Investigating patient safety culture across a health system: multilevel modelling of differences associated with service types and staff demographics. *Int J Qual Health Care* 2012.
- 27 Travaglia JF, Westbrook MT, Braithwaite J. Implementation of a patient safety incident management system as viewed by doctors, nurses and allied health professionals. *Health (London)* 2009; 13(3):277-296.
- 28 McHugh MD, Stimpfel AW. Nurse reported quality of care: A measure of hospital quality. *Res Nurs Health* 2012.
- 29 Shang J, Friese CR, Wu E et al. Nursing Practice Environment and Outcomes for Oncology Nursing. *Cancer Nurs* 2012.
- 30 Van BP, Clarke S, Roelant E et al. Impacts of unit-level nurse practice environment and burnout on nurse-reported outcomes: a multilevel modelling approach. *J Clin Nurs* 2010; 19(11-12):1664-1674.

- 1  
2  
3 31 Ausserhofer D, Schubert M, Engberg S et al. Nurse-reported patient safety climate in Swiss  
4 hospitals: a descriptive-explorative substudy of the Swiss RN4CAST study. *Swiss Med Wkly*  
5 2012; 142:0.  
6  
7 32 Aiken LH, Clarke SP, Sloane DM et al. Nurses' reports on hospital care in five countries. *Health*  
8 *Aff (Millwood )* 2001; 20(3):43-53.  
9  
10 33 Aiken LH, Clarke SP, Sloane DM. Hospital staffing, organization, and quality of care: cross-  
11 national findings. *Int J Qual Health Care* 2002; 14(1):5-13.  
12  
13 34 Braithwaite J, Westbrook MT, Robinson M et al. Improving patient safety: the comparative  
14 views of patient-safety specialists, workforce staff and managers. *BMJ Qual Saf* 2011;  
15 20(5):424-431.  
16  
17 35 Warren CR, Landis RS. One is the loneliest number: A meta-analytic investigation on single-item  
18 measure fidelity . *Ergometrika* 2007; 4(1):32-35.  
19  
20 36 Lake ET. Development of the practice environment scale of the Nursing Work Index. *Res Nurs*  
21 *Health* 2002; 25(3):176-188.  
22  
23 37 Blegen MA, Gearhart S, O'Brien R et al. AHRQ's hospital survey on patient safety culture:  
24 psychometric analyses. *J Patient Saf* 2009; 5(3):139-144.  
25  
26 38 Sjetne IS, Tvedt C, Squires A. Måleinstrumentet "The Nursing Work Index-Revised" -  
27 oversettelse og utprøving av en norsk versjon. ["The Nursing Work Index-Revised" -Instrument  
28 translation and assessment of a Norwegian version]. *Sykepleien Forskning* 2011; 6(4):358-365.  
29  
30 39 Schein EH. Organizational culture and leadership. San Francisco: Jossey-Bass; 2004.  
31  
32 40 Wong CA, Cummings GG. The relationship between nursing leadership and patient outcomes: a  
33 systematic review. *J Nurs Manag* 2007; 15(5):508-521.  
34  
35 41 Huseby, B (red). Specialist health care services 2009 (SAMDATA). 2010. Oslo, The Norwegian  
36 Directorate of Health. 978.  
37 Ref Type: Report  
38  
39 42 Statistics Norway. Statbank. 2012 Available from:  
40 URL:<http://statbank.ssb.no/statistikbanken/>  
41  
42 43 West E. Management matters: the link between hospital organisation and quality of patient  
43 care. *Qual Health Care* 2001; 10(1):40-48.  
44  
45 44 Taylor SL, Dy S, Foy R et al. What context features might be important determinants of the  
46 effectiveness of patient safety practice interventions? *BMJ Qual Saf* 2011; 20(7):611-617.  
47  
48 45 Dy SM, Taylor SL, Carr LH et al. A framework for classifying patient safety practices: results  
49 from an expert consensus process. *BMJ Qual Saf* 2011; 20(7):618-624.  
50  
51 46 Kramer M, Schmalenberg C, Brewer BB et al. Accurate assessment of clinical nurses' work  
52 environments: response rate needed. *Res Nurs Health* 2009; 32(2):229-240.  
53  
54 47 Spector PE, Brannick MT. Common Method Issues: An Introduction to the Feature Topic in  
55 Organizational Research Methods. *Organizational Research Methods* 2010; 13(3):403-406.  
56  
57  
58  
59  
60

- 1  
2  
3 48 Conway JM, Lance CE. What Reviewers Should Expect from Authors Regarding Common  
4 Method Bias in Organizational Research. *Journal of Business and Psychology (J Bus Psychol)*  
5 2010; 25:325-334.  
6  
7 49 Brannick MT, Chan D, Conway JM et al. What is Method Variance and How Can We Cope With  
8 It? A Panel Discussion. *Organizational Research Methods* 2010; 13(3):407-420.  
9  
10 50 Lance CE, Dawson P, Birkelbach D et al. Method Effects, Measurement Error, and Substantive  
11 Conclusions. *Organizational Research Methods* 2011; 13(3):435-455.  
12  
13 51 Siemsen E, Roth A, Oliveira P. Common Method Bias in Regression Models With Linear,  
14 Quadratic, and Interaction Effects. *Organizational Research Methods* 2010; 13(3):456-476.  
15  
16 52 Cummings GG, Hayduk L, Estabrooks CA. Is the Nursing Work Index Measuring Up?: Moving  
17 Beyond Estimating Reliability to Testing Validity. *Nurs Res* 2006; 55(2):82-93.  
18  
19 53 Sjetne IS, Veenstra M, Ellefsen B et al. Service quality in hospital wards with different nursing  
20 organization: nurses' ratings. *J Adv Nurs* 2009; 65(2):325-336.  
21  
22 54 Bonnetterre V, Liaudy S, Chatellier G et al. Reliability, validity, and health issues arising from  
23 questionnaires used to measure Psychosocial and Organizational Work Factors (POWFs) among  
24 hospital nurses: a critical review. *J Nurs Meas* 2008; 16(3):207-230.  
25  
26 55 Zohar D. Safety climate in industrial organizations: theoretical and applied implications. *J Appl*  
27 *Psychol* 1980; 65(1):96-102.  
28  
29 56 Aiken LH, Clarke SP, Cheung RB et al. Educational levels of hospital nurses and surgical patient  
30 mortality. *JAMA* 2003; 290(12):1617-1623.  
31  
32 57 McAlearney AS, Garman AN, Song PH et al. High-performance work systems in health care  
33 management, part 2: qualitative evidence from five case studies. *Health Care Manage Rev*  
34 2011; 36(3):214-226.  
35  
36 58 Haley RW, Quade D, Freeman HE et al. The SENIC Project. Study on the efficacy of nosocomial  
37 infection control (SENIC Project). Summary of study design. *Am J Epidemiol* 1980; 111(5):472-  
38 485.  
39  
40 59 Naveh E, Stem Z. How quality improvement programs can affect general hospital performance.  
41 *Int J Health Care Qual Assur Inc Leadersh Health Serv* 2005; 18(4-5):249-270.  
42  
43 60 Maguerez G, Erbault M, Terra JL et al. Evaluation of 60 continuous quality improvement  
44 projects in French hospitals. *Int J Qual Health Care* 2001; 13(2):89-97.  
45  
46 61 Tvedt C, Bukholm G. Healthcare workers' self-reported effect of an interventional programme  
47 on knowledge and behaviour related to infection control. *Qual Saf Health Care* 2010; 19(6):e7.  
48  
49 62 Kohn,L.T, Corrigan JM, Donaldson MSe. To err is human : building a safer health system.  
50 Washington, D.C.: National Academy Press; 2000.  
51  
52 63 Goeschel CA, Wachter RM, Pronovost PJ. Responsibility for quality improvement and patient  
53 safety: hospital board and medical staff leadership challenges. *Chest* 2010; 138(1):171-178.  
54  
55  
56  
57  
58  
59  
60



- 1  
2  
3 64 Conway J. Getting boards on board: engaging governing boards in quality and safety. *Jt Comm J*  
4 *Qual Patient Saf* 2008; 34(4):214-220.  
5  
6 65 Castner J, Foltz-Ramos K, Schwartz DG et al. A Leadership Challenge: Staff Nurse Perceptions  
7 After an Organizational TeamSTEPPS Initiative. *J Nurs Adm* 2012; 42(10):467-472.  
8  
9 66 Quick J. Modern perioperative teamwork: an opportunity for interprofessional learning. *J*  
10 *Perioper Pract* 2011; 21(11):387-390.  
11  
12 67 West P, Sculli G, Fore A et al. Improving Patient Safety and Optimizing Nursing Teamwork Using  
13 Crew Resource Management Techniques. *J Nurs Adm* 2012; 42(1):15-20.  
14  
15 68 Manser T. Teamwork and patient safety in dynamic domains of healthcare: a review of the  
16 literature. *Acta Anaesthesiol Scand* 2009; 53(2):143-151.  
17  
18 69 Auerbach AD, Sehgal NL, Blegen MA et al. Effects of a multicentre teamwork and  
19 communication programme on patient outcomes: results from the Triad for Optimal Patient  
20 Safety (TOPS) project. *BMJ Qual Saf* 2011.  
21  
22 70 Baker DP, Day R, Salas E. Teamwork as an essential component of high-reliability organizations.  
23 *Health Serv Res* 2006; 41(4 Pt 2):1576-1598.  
24  
25 71 Schmalenberg C, Kramer M. Nurse-physician relationships in hospitals: 20,000 nurses tell their  
26 story. *Crit Care Nurse* 2009; 29(1):74-83.  
27  
28 72 Christianson MK, Sutcliffe KM, Miller MA et al. Becoming a high reliability organization. *Crit*  
29 *Care* 2011; 15(6):314.  
30  
31 73 Allen D, Rixson L. How has the impact of 'care pathway technologies' on service integration in  
32 stroke care been measured and what is the strength of the evidence to support their  
33 effectiveness in this respect? *Int J Evid Based Healthc* 2008; 6(1):78-110.  
34  
35 74 Pronovost P, Needham D, Berenholtz S et al. An intervention to decrease catheter-related  
36 bloodstream infections in the ICU. *N Engl J Med* 2006; 355(26):2725-2732.  
37  
38 75 Tervo-Heikkinen T, Kiviniemi V, Partanen P et al. Nurse staffing levels and nursing outcomes: a  
39 Bayesian analysis of Finnish-registered nurse survey data. *J Nurs Manag* 2009; 17(8):986-993.  
40  
41 76 Djukic M, Kovner CT, Brewer CS et al. Work environment factors other than staffing associated  
42 with nurses' ratings of patient care quality. *Health Care Manage Rev* 2011.  
43  
44 77 Gunnarsdottir S, Clarke SP, Rafferty AM et al. Front-line management, staffing and nurse-  
45 doctor relationships as predictors of nurse and patient outcomes. A survey of Icelandic hospital  
46 nurses. *Int J Nurs Stud* 2007.  
47  
48 78 Shekelle PG, Pronovost PJ, Wachter RM et al. Advancing the science of patient safety. *Ann*  
49 *Intern Med* 2011; 154(10):693-696.  
50  
51 79 Thornlow DK, Stukenborg GJ. The association between hospital characteristics and rates of  
52 preventable complications and adverse events. *Med Care* 2006; 44(3):265-269.  
53  
54 80 Sjetne IS, Veenstra M, Stavem K. The effect of hospital size and teaching status on patient  
55 experiences with hospital care: a multilevel analysis. *Med Care* 2007; 45(3):252-258.  
56  
57  
58  
59  
60

- 1  
2  
3 81 El-Jardali F, Dimassi H, Jamal D et al. Predictors and outcomes of patient safety culture in  
4 hospitals. *BMC Health Serv Res* 2011; 11:45.  
5  
6 82 Park S, Lake ET. Multilevel modeling of a clustered continuous outcome: nurses' work hours  
7 and burnout. *Nurs Res* 2005; 54(6):406-413.  
8  
9  
10  
11  
12  
13  
14  
15  
16  
17  
18  
19  
20  
21  
22  
23  
24  
25  
26  
27  
28  
29  
30  
31  
32  
33  
34  
35  
36  
37  
38  
39  
40  
41  
42  
43  
44  
45  
46  
47  
48  
49  
50  
51  
52  
53  
54  
55  
56  
57  
58  
59  
60

For peer review only



**Title:**

**AN OBSERVATIONAL STUDY TO IDENTIFY ORGANIZATIONAL PROCESSES  
ASSOCIATED WITH NURSE-REPORTED QUALITY AND PATIENT SAFETY**

**Corresponding author:**

Name: Christine Tvedt

Postal address: Department of Quality Measurement and Patient Safety, The Norwegian

Knowledge Centre for the Health Services, Oslo, Norway

Institute of Health and Society, University of Oslo, Oslo, Norway

PO Box 7004 St. Olavs plass

N-0130 Oslo, Norway

E-mail: cht@nokc.no

Telephone: +47 97 71 55 45

Fax: +47 23 25 50 10

**Co-authors:**

Ingeborg Strømseng Sjetne, Department of Quality Measurement and Patient Safety, The  
Norwegian Knowledge Centre for the Health Services, Oslo, Norway.

Jon Helgeland, Department of Quality Measurement and Patient Safety, The Norwegian  
Knowledge Centre for the Health Services, Oslo, Norway.

Geir Bukholm, Centre for Laboratory Medicine, Østfold Hospital Trust, Fredrikstad, Norway  
Institute of Health and Society, University of Oslo, Oslo, Norway

**Key-words:**

Patient safety, performance measures, nurses, survey, quality measurement.

**Word count:** 3788

## ABSTRACT

**Objectives:** The purpose of this study was to identify organisational processes and structures that are associated with nurse-reported patient safety and quality of nursing. Health care workers' ~~attitudes and~~ perceptions related to patient safety vary by disciplines within the health care organisations, and organizational design promoting patient safety among nurses as a micro system of hospitals is studied, and nurses constitute a large proportion of health care workers. ~~To target patient safety interventions it is vital to understand how nurses as a microsystem assess organisational structures and processes and relate them to patient safety.~~

**-Design:** ~~This is e-present study is~~ an observational cross-sectional study using survey methods

**Setting:** Respondents from 31 ~~The multicenter study is conducted in 35~~ Norwegian hospitals with more than 85 beds were included in the survey.

**Participants:** All registered nurses working in direct patient care in a position of 20 % or more were invited to answer the survey. In this study 3618 nurses from surgical and medical wards responded (response rate 58.9). Nurses practice environment was defined as organisational processes and measured by the *Nursing Work Index Revised* and items from *Hospital Survey on Patient Safety Culture*.

**Outcome measures:** Nurses' assessments of patient safety, quality of nursing, confidence in how their patients manage after discharge and frequency of adverse events were used as outcome measures.

**Results** Quality system, nurse-physician relation, patient safety management and staff adequacy were process measures associated with nurse-reported work- and patient- related outcomes, but we found no associations with nurse participation, education and career and ward leadership. Most organisational structures were non-significant in the multilevel model

1  
2  
3 except for nurses' affiliations to medical department and hospital type. Active programs to  
4 ensure quality, hospital management that encourage patient safety and having sufficient staff  
5 to provide quality of care were consistently related to how nurses perceive both work and  
6 patient related outcome measures. Nurse physician relationship and working in a regional  
7 hospital gave higher ratings for work related outcomes. Bed occupancy and nurse patient  
8 ratio was positively associated with how nurses assessed patient related outcomes.

9  
10  
11  
12  
13  
14  
15  
16 **Conclusion** Organisational structures may have minor impact on how nurses perceive work-  
17 and patient related outcomes, but the findings in this study indicate that there is a considerable  
18 potential to address organizational design in improvement of patient safety and quality of  
19 care.

### 20 21 22 23 Article focus

- 24  
25  
26  
27 • Identifying organizational processes and structures associated to nurse-reported quality  
28 and patient safety in hospitals
- 29  
30  
31 • Increase knowledge about organizational design promoting patient safety among  
32 nurses as a micro system of hospitals

### 33 34 35 36 Key messages

- 37  
38  
39 • Organizational processes may have a considerable potential to address organizational  
40 design in improvement of patient safety and quality of care.

### 41 42 43 44 Strengths and limitations

- 45  
46  
47 • A considerable number of nurses have given their responses on a multicenter nurse  
48 survey providing a valuable data material.
- 49  
50  
51 • Several aspects of the survey method may have influenced the results of this study  
52  
53  
54  
55  
56  
57  
58  
59  
60

## AN OBSERVATIONAL STUDY TO IDENTIFY ORGANIZATIONAL PROCESSES ASSOCIATED WITH NURSE-REPORTED QUALITY AND PATIENT SAFETY

### Introduction

The report “Crossing the quality chasm” from the Institute of medicine in 2001 called for a system change to improve safety in the health care services<sup>1</sup>. The report led to establishment of patient safety programmes and health care reforms in many Western countries. The introduction of evidence-based practice, guidelines, performance measurements, and feedback has characterized patient safety initiatives in hospitals during the last decade. ~~However,~~ ~~Results~~ from evaluations of the ~~interventional~~ efforts are inconsistent, and several authors have described a need to better understand how organizational features contribute to quality and patient safety in hospitals<sup>2-4</sup>. The organizational climate is defined by the employees’ perceptions of these features, and might be understood as structural properties of the organisation and employees’ perceptions of their organisational environment<sup>5</sup>. Both organizational structures (e.g. hospital size, hospital volume) and organisational processes (e.g. patient safety climate, perception of work environment) have been associated with safety outcomes<sup>4-6</sup>.

The system perspective is based on how input to the health care system is managed and how this input benefits the patients and society<sup>1</sup>. The underlying hypothesis of Donabedian’s model for quality serve as a framework to understand how is that hospital structures and processes contribute to health care outcomes and the model is modified by Battle et al to illustrate how processes exist within the structure of the healthcare system<sup>7-9</sup>. Battles describe how adjustments of organisational structures and processes may contribute to a reduction of failures that cause adverse events. An organisational climate where processes and structures allow patient safety improvements is required to minimize the failures of care<sup>3,9</sup>. Inertia of

1  
2  
3 organizational change observed in health care institutions is suggested as one explanation for  
4 why the “progress of patient safety improvements has been slow”<sup>3</sup>. A leadership with clear  
5 visions and strategies is a key to transformational change towards a patient safe organization,  
6 and<sup>10</sup> knowledge about how health care workers assess their work environment and patient  
7 safety in their work place should therefore be essential to these leaders<sup>10</sup>.

8  
9  
10  
11  
12  
13  
14  
15  
16 ~~There is~~The a growing body of evidence on how work environment is associated with  
17 associations between organizational features and healthcare performance support this view.  
18  
19  
20 In studies of Pphysicians’ work environment ~~has been associated~~ associations with the quality  
21 of health service delivery have been presented and improvement of nurses’ work environment  
22 is suggested ~~as could be~~ a cost effective strategy to improve patient outcomes<sup>11-15</sup>. Several  
23 studies have presented associations between nurses’ work environment and Work  
24 environment for nurses has been associated with patient outcomes such as patient outcomes  
25 like adverse events, risk-adjusted mortality and patient satisfaction<sup>15-21</sup>. These are important  
26 studies identifying associations between patient outcome and features of the health care  
27 organisation. However, information about how health care workers take advantage of  
28 processes and structures in the organization is essential for design of patient safe health care  
29 organisations<sup>9,22,23</sup>.

30  
31  
32  
33  
34  
35  
36  
37  
38  
39  
40  
41  
42  
43  
44  
45 Attitudes and perceptions related to patient safety vary by disciplines and micro systems. ~~and~~  
46 ~~€~~The planning and implementation of strategies and interventions to improve patient safety  
47 should take such variations into account<sup>22,24-27</sup>. ~~Donabedian’s recognized approach to explore~~  
48 what is important in modern health care planning serves as framework for this study. Despite  
49 the fact that nurse-reported quality of care have been associated with failure to rescue, patient  
50 satisfaction and processes of care, a small number of studies has explored how nurse-reported  
51  
52  
53  
54  
55  
56  
57  
58  
59  
60

patient safety is associated with work environment<sup>28 29 30-33 33</sup> Information about how individuals within the microsystems perceive and take advantage of processes and structures in the organization is vital for the design of patient safe health care institutions. may be explained by an inherence of values and traditions among health care workers that restrain the eapacity for transformation<sup>3</sup>.

## **Objectives**

Nurses constitute a large proportion of health care workers, and how they perceive an organizational design promoting patient safety may provide<sup>is</sup> essential information about nurses as a microsystem<sup>4,8,34</sup>. The purpose of this study was to identify organisational process measures in nurses' work environment and hospital characteristics (organisational structure measures) that were associated with nurse-reported patient safety and quality of nursing. In particular, we were interested in which process measures remained after adjusting for organisational structure measures. n the present investigation we study how nurses assess organisational features and relate them to patient safety and quality of nursing.

## **Methods**

### Design

The theoretical approach of this observational cross sectional study was based on Donabedian's dimensions of a quality model: structure, process and outcome. We modified Battles' version of this model to illustrate how hospital characteristics, nurses' work environment and nurse-reported quality of nursing and patient safety were nested (figure 1). The readers should bear in mind that these variables only represent part of a complex reality.

Figure 1 Modification of the Battles model to illustrate the nested relationship of structure, process and outcome<sup>7</sup>

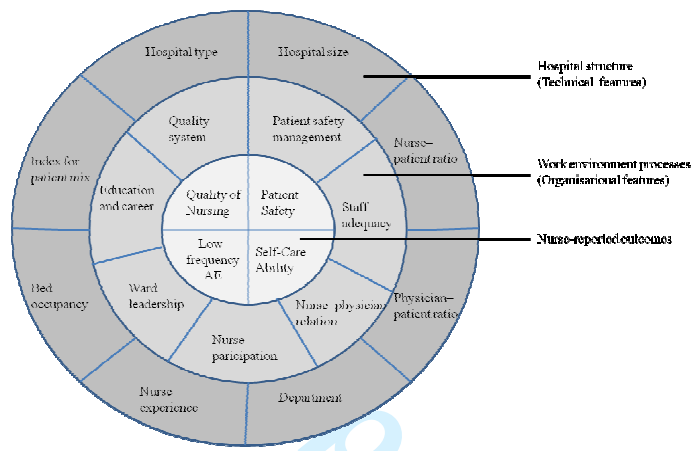

and data collection

~~This is observational cross-sectional study involves a study involved a~~ survey among nurses in surgical and medical wards in 35 Norwegian hospitals with more than 85 beds. The data collection was part of the European RN4Cast study<sup>11</sup>. A paper questionnaire, information letter, and return envelope were distributed through the nurses' union representatives to 6600 nurses during the autumn of 2009. Registered nurses working in direct patient care in a position of 20% or more were included, and nurses on long-term leaves were excluded.

Nurses received the questionnaire at their workplaces, and the distribution procedures included collection of information about nurses' affiliations to hospital, department and ward.

Personal reminders- were not distributed as- the respondents' names and addresses were not available to the researchers, and nowere distributed. In some hospital wards the union representatives and/or nurse leaders gave collective reminders. The method of data collection and handling was approved by the Data Protection Official for Research.

Nurse-reported outcome measures

The use of self-reported outcomes in this study was necessary to describe how nurses perceived quality of nursing and patient safety at their work places. The dependent variables were based on nurses' responses to single-item overall assessment of global questions about quality of nursing and patient safety were used as outcome variables as practiced in from the questionnaire—other studies investigating nurse-reported quality and patient safety<sup>30-33,35</sup>. We defined the four questions as variables that describe ~~The outcomes were divided into two groups of which~~ “work-related” referring to how nurses assess report work performance related to patient safety and “patient-related” referring to nurses' assessment reports of patient outcomes:

Work-related outcome measures

- Quality of Nursing: In general, how would you describe the quality of nursing care delivered to patients on your unit/ward? (four-point Likert-type scale where 1=poor, 2=fair, 3=good, and 5=excellent, meaning that high scores indicate better quality)
- Patient Safety: Please give your department an overall grade on patient safety. (5-point Likert-type scale where 1=failing, 2=poor, 3=acceptable, 4=very good, and 5=excellent, meaning that high scores indicate better Patient Safety)

Patient-related outcome measures

- ~~Self-care ability~~ Self-Care Ability: How confident are you that your patients are able to manage their care when discharged? (four-point Likert-type scale where 1=not at all confident, 2=somewhat confident, 3=confident, and 4=very confident, meaning that high scores indicate more confidence in how patients manage)



- 1  
2  
3  
4  
5  
6  
7  
8  
9  
10  
11  
12  
13  
14  
15  
16  
17  
18  
19  
20  
21  
22  
23  
24  
25  
26  
27  
28  
29  
30  
31  
32  
33  
34  
35  
36  
37  
38  
39  
40  
41  
42  
43  
44  
45  
46  
47  
48  
49  
50  
51  
52  
53  
54  
55  
56  
57  
58  
59  
60
- Low Frequent AE: Nurses were also asked to estimate how frequently adverse events have happened to their patients on a seven-point Likert-type scale (1=~~every day~~never, 2=some times per ~~week~~year, 3=once a ~~week~~month or less, 4=some times per month, 5=once a ~~month or less~~week, 6=some times per ~~year~~week, 7= every day~~never~~). We recoded the subscale into the opposite direction so that the lowest frequency (Low frequency AE = preferably) made the highest scores.

Different types of adverse events where subjects of the question and in this study we calculated the mean of the seven adverse events scores per nurse:

- Pressure ulcers after admission
- Patients received wrong medication, time or dose
- Patient falls with injury
- Urinary tract infections
- Bloodstream infections
- Complaints from patients or their families
- Pneumonia

~~In the present study the different types of adverse events in question are summarized in a composite score for absence of nurse reported adverse events (figure 1).~~

Organizational process measures

Nurses' work environment was measured by the instrument *Nursing Work Index (NWI)*<sup>36</sup> and a subscale including items from *The Hospital Survey on Patient Safety Culture (HSOPSC)*<sup>37</sup>. ~~These subscales were regarded as organizational processes and made the following variables:~~

- *Education and career*
- *Nurse participation*
- *Quality system*
- *Ward leadership*
- *Staff adequacy*
- *Nurse physician relation*

- Patient safety management

~~The nurses' work environment was measured by the practice environment scale of the nursing work index revised (PES-NWI). The instrument has been tested in different cultural contexts, and t~~The Norwegian version of ~~the PES-NWI~~ has been translated and tested according to acknowledged procedures for questionnaire modifications between cultures<sup>38</sup>. We performed an exploratory analysis to identify the factor structure of the Norwegian dataset. The subscales identified were used as explanatory variables in the study.

The items were four-point Likert-type scales, and high scores indicated agreement that the items were present in the job situation ~~where~~ (1=strongly disagree, 2=somewhat disagree, 3=somewhat agree, and 4=strongly agree). The scale scores were calculated as the single items' average for all respondents who had valid scores on at least half of the items included in the scale in question, ~~and the scores were also linearly transformed from a 1-4 to a 0-100 scale.~~

Leadership is essential for development of organisational/patient safety culture, and we included three items from the HSOPSC-questionnaire<sup>37,39,40</sup>. The items represent leadership topics such as performance feedback and actions showing that patient safety has yes priority in hospital management. ~~We regarded a subscale of these items~~ as process measure for the work environment. High scores indicated agreement that the items were present in the job situation ~~The items were aggregated as a composite score~~ (five-point Likert-type scale: 1=strongly disagree, 2=disagree, 3=neither, 4=agree, 5=strongly agree).~~.~~

Organizational structure measures

Information about the hospitals were collected from public registers, reported from hospital administrations on our request, or aggregated from the survey data<sup>41,42</sup>. The following variables-measures were defined-used as organizational structure measures-variables:

- Nurse-patient ratio (Number of nurse man-years per 10,000 patient days, 2009)<sup>42</sup>
- Physician-patient ratio (Number of physician man-years per 10,000 patient days, 2009)<sup>42</sup>
- Index for patient mix (The ratio between the number of DRG-points and the number of admissions, 2009)<sup>41</sup>
- Hospital size (Number of beds, 2009)<sup>41</sup>
- Hospital type (made as two dummy-variables):
  - Regional university hospital (versus-reference value: local hospital)
  - Central-Local university hospital (versus-reference value: local hospital)
- Bed occupancy (mean bed occupancy in percent for 2009, hospital reported)
- Medical department (from the nurse survey: Nurses' affiliation to medical department with reference value: surgical department-versus surgical)
- Nurse experience (in years per hospital derived (survey data-nurse survey))

“Regional university hospitals” were defined as university hospitals with national responsibilities, while “local university hospitals” were defined as university hospitals without national responsibilities. All other hospitals were defined as “local hospitals”. We collected organisational structure measures to ensure validity and comparability for all hospitals included in the survey. The measures selected for this study was chosen after considerations of literature discussing the context of patient safety research and practices. To describe and classify patient safety practices and research hospital type and size, patient clinical complexity, and professional staffing are suggested as essential structural

1  
2  
3 features<sup>4,6,43,44 45</sup>. Theoretical considerations and the availability of data guided the selection  
4 of structure measures of the organizations. Based upon the results from an expert panel  
5 consensus on what features are important in order to evaluate patient safety interventions, we  
6 included variables that describe. All of these are

### 14 **Statistical analysis**

15  
16 All analyses were made using SPSS version 15.0.

17  
18 ~~Principal axis factoring with promax rotation was used~~ We used exploratory factor analysis  
19 to examine the structure of NWI in the Norwegian dataset, involving identify the factor  
20 structure of PES-NWI. Internal consistency was evaluated based on the complete Norwegian  
21 data set with nurses in intensive care units, medical wards, and surgical wards (n=5490). We  
22 performed reliability tests to obtain internal consistency for these subscales and Items scoring  
23 less than 0.3 were excluded. Correlations were made to compare the results with factor  
24 structures identified in other studies<sup>36</sup>. A reliability test was performed to test the consistency  
25 of the for the subscale from HSOPSC composite measure.

26  
27  
28  
29  
30  
31  
32  
33  
34  
35  
36  
37  
38 The questionnaire was distributed to 6147 nurses in medical and surgical wards, and 3618  
39 responded (mean response rate: 58.9%). Based on recommendations for cut points for  
40 response rates we included 31 hospitals with a survey response rate above 40%<sup>46</sup> Nurses from  
41 intensive care units were excluded in the because the number of these units, the size, and the  
42 type of patients admitted vary between hospitals.. ~~In these hospitals~~

43  
44  
45  
46  
47  
48  
49 Scores of outcome and explanatory variables were transformed into a 0–100 scale, 0  
50 representing the lowest possible score and 100 the highest possible score. Organizational  
51 structure variables were transformed into variables relative to *hospital type* to control for the  
52 assumption of dependency with *hospital type* (in the following marked with “R” in variable

names). The transformation was made by subtracting the mean values of *hospital type* for each case. The unit of observation was individuals, ~~and nurse characteristics are presented at an individual level.~~ Descriptive statistics of organizational structure ~~and process~~ measures were made ~~on the~~ hospital-aggregated level.

~~Initially bivariate regression analysis for each organisational variable and each nurse-reported outcome was performed. In the~~ stepwise multivariate regression ~~that followed, all organisational variables with all and possible all potential~~ interactions ~~were~~ included ~~in the model. Those~~ ~~Main effects and~~ interactions that remained significant on a 0.05 level were included in the ~~following analyses. in the~~ final multivariate ~~multilevel~~ regression ~~introducing hospital ward and hospital as level 2 and 3 variables model we~~ ~~Interactions. Interactions~~ between *hospital type* and other structural variables were removed ~~in the final model~~ because they were related to features of single hospitals.

## Results

The exploratory factor analysis identified six subscales ~~from NWI~~, and internal consistency (Cronbach's alpha) ranged from 0.68 to 0.88 in the reliability test. ~~ing gave, with nurse participation as the lowest and collegial nurse-physician relation as the highest~~ (see table 1).

~~Construction of the subscales and the subscales from PES-NWI<sup>36</sup> are presented. The items included in each subscale are shown~~ in figure 2 (online-only). ~~Internal consistency (Cronbach's alpha) of the three items from HSOPSC was 0.72.~~

Table 1 Internal consistency (Cronbach's alpha) ~~of subscales from NWI~~

| Subscales                                   | Number of items | Internal consistency (Cronbach's alpha) |
|---------------------------------------------|-----------------|-----------------------------------------|
| <i>Staff adequacy</i>                       | 3               | 0.80                                    |
| <i>Nurse physician relation</i>             | 7               | 0.88                                    |
| <i>Ward leadership</i>                      | 4               | 0.78                                    |
| <i>Nurse participation</i>                  | 5               | 0.68                                    |
| <i>Education and career</i> (possibilities) | 4               | 0.73                                    |
| <i>Quality system</i>                       | 7               | 0.71                                    |

Pearson's correlations between the principal axis factoring of the Norwegian data and the original factor structure presented by Lake are shown in table 3 (online only)<sup>36</sup>.

Reliability testing of the composite score made by three items from HSOPSC gave a Cronbach's alpha of 0.72.

The structural characteristics of hospitals included in the survey are described in table 2. Most of the hospitals were categorized as local (23), but three hospitals were *central-local university hospitals* and another five were *regional university hospitals*.

Table2: Characteristics of the included hospitals (N=Organizational structure measures31)

| Hospital characteristics                                    | Median | Min.–max.   |
|-------------------------------------------------------------|--------|-------------|
| Hospital size <sup>1)</sup>                                 | 414    | 85–958      |
| Index for patient mix <sup>2)</sup>                         | 8.0    | 6.9–11.3    |
| Physician–patient ratio <sup>3)</sup>                       | 20.5   | 9.6–38.8    |
| Nurse–patient ratio <sup>4)</sup>                           | 53.3   | 29.9–82.9   |
| Nurse experience (no. of years per hospital <sup>5)</sup> ) | 8.6    | 4.1–13.3    |
| Bed occupancy <sup>6)</sup>                                 | 87.3   | 75.2 –102.7 |

1) Number of beds 2) The ratio between the number of DRG-points and the number of admissions 3) Number of physician-years per 10,000 patient days 4) Number of nurse-years per 10,000 patient days 5) Mean years of experience among the respondents per hospital 6) Percent, bed occupancy for 2009

About 90 % of Norwegian nurses are members of NNO, and mean age among these nurses are 43, 90 % were female. The mean age of nurse respondents (N=3618) in this study the

survey was 35.6 (median 33, range 21–71), and their mean experience as nurses was 8.4 (median 5, range 0–45). Most nurses were female (93.8%). All registered nurses in Norway hold a Bachelor's degree, and 15.3% of the respondents had further education. The distribution of nurses between *hospital types* was 13.6% for ~~central~~local university hospital and 29.2% for ~~regional~~regional university hospital. The distribution between departments was about even, with 56.4% of nurses working in medical departments.

Organizational process variables ~~aggregated at hospital level~~ are presented in table 3. ~~The lowest scores were obtained for n~~Nurse participation and staff adequacy had the lowest scores, while ~~agreement with~~nurse-physician relation and ward leadership had high scores was high.

Table 3 Nurses' assessment of organizational process measures (N=3618)

| <b>Hospital characteristics</b>  | <b>N</b>    | <b>Median</b>    | <b>Min.–max.</b>      | <b>SD</b>   |
|----------------------------------|-------------|------------------|-----------------------|-------------|
| <i>Patient safety management</i> | <u>3556</u> | <u>54.658.3</u>  | <u>43.5–64.80-100</u> | <u>18.7</u> |
| <i>Staff adequacy</i>            | <u>3602</u> | <u>44.344.4</u>  | <u>25.4–61.30-100</u> | <u>22.4</u> |
| <i>Nurse-physician relation</i>  | <u>3602</u> | <u>67.666.67</u> | <u>60.3–76.70-100</u> | <u>15.9</u> |
| <i>Education and career</i>      | <u>3603</u> | <u>48.850.0</u>  | <u>33.2–71.20-100</u> | <u>20.5</u> |
| <i>Quality system</i>            | <u>3594</u> | <u>52.552.4</u>  | <u>42.5–65.00-100</u> | <u>15.8</u> |
| <i>Nurse participation</i>       | <u>3641</u> | <u>38.940.0</u>  | <u>29.0–53.10-100</u> | <u>17.6</u> |
| <i>Ward leadership</i>           | <u>3612</u> | <u>61.766.67</u> | <u>50.0–77.80-100</u> | <u>20.6</u> |

Bivariate linear regression showed that, with a few exceptions, organizational structure and process measures were associated with nurses' assessment reports of Quality of Nursing, Patient Safety, Self-care abilitySelf-Care Ability, and Low-Frequent AELow frequency AE (see table 4, online only). The ~~explanatory variables and interactions found significant in the stepwise model were analysed in a multivariate~~final - multivariate multilevel model introducing hospital ward and hospital as with level 2 and 3 variables, showed that almost all variance was found on individual level, and demonstrated that correlation among observations within the hospitals was lower than for hospital wards-main effects of the interactions included (table 5). The correlation at hospital level accounted for 0.22 % – 0.74 % of the total

variance, and correlation at hospital ward level accounted for 2.46 % – 8.64 % of the total variance (table 5).

Table 5 Multivariate multilevel regression analysis of process/structure measures and nurses' self-reported work- and patient-related outcomes (N=3618)

|                    |                                                     | Work-related outcomes |                       | Patient-related outcomes |                       |
|--------------------|-----------------------------------------------------|-----------------------|-----------------------|--------------------------|-----------------------|
|                    |                                                     | Quality of Nursing    | Patient Safety        | Self-Care Ability        | Low frequency AE      |
|                    |                                                     | Coefficient (p-value) | Coefficient (p-value) | Coefficient (p-value)    | Coefficient (p-value) |
| Process measures   | <i>Patient safety management</i>                    | 0.0910<br>(<0.001)    | 0.1920<br>(<0.001)    | 0.134<br>(<0.001)        | 0.06<br>(<0.001)      |
|                    | <i>Staff adequacy</i>                               | 0.1512<br>(<0.001)    | 0.123<br>(<0.001)     | 0.1012<br>(<0.001)       | 0.046<br>(<0.001)     |
|                    | <i>Nurse-physician relation</i>                     | 0.06<br>(0.0013)      | 0.076<br>(<0.001)     | 0.087<br>(0.00620)       |                       |
|                    | <i>Education and career</i>                         |                       |                       |                          |                       |
|                    | <i>Quality system</i>                               | 0.25<br>(<0.001)      | 0.18<br>(<0.001)      | 0.201<br>(<0.001)        | 0.0910<br>(<0.001)    |
|                    | <i>Nurse participation</i>                          | -0.054<br>(0.02811)   |                       |                          |                       |
|                    | <i>Ward leadership</i>                              | 0.054<br>(0.01134)    |                       |                          | -0.035<br>(<0.0081)   |
| Structure measures | <i>Central/Local university hospital</i>            |                       |                       |                          | -3.08244<br>(<0.0018) |
|                    | <i>Regional/Regional university hospital</i>        | 3.5745<br>(<0.0013)   | 1.89212<br>(0.02402)  | 1.4871<br>(<0.375122)    |                       |
|                    | <i>Nurse-patient ratio-R</i>                        |                       |                       | 0.201<br>(0.127025)      |                       |
|                    | <i>Physician-patient ratio-R</i>                    |                       |                       | -0.286<br>(0.290145)     |                       |
|                    | <i>Bed occupancy-R</i>                              |                       | 0.001<br>(0.95505)    | -0.250<br>(0.05516)      | -0.098<br>(0.127007)  |
|                    | <i>Index for patient mix-R</i>                      | 0.010<br>(0.861994)   |                       | 0.101<br>(0.415212)      |                       |
|                    | <i>Nurse experience-R</i>                           |                       |                       | -0.772<br>(0.07114)      | 0.337<br>(<0.05101)   |
|                    | <i>Hospital size-R</i>                              |                       |                       | -0.02<br>(0.533446)      |                       |
|                    | <i>Medical department</i>                           | 0.2332<br>(0.769572)  | -1.12096<br>(0.03933) | -5.8948<br>(<0.001)      |                       |
| Interactions       | <i>Index for patient mix-R * Medical department</i> | 0.142<br>(0.068114)   |                       | -0.28<br>(0.032)         | -                     |
|                    | <i>Nurse-patient ratio-R * nurse experience-R</i>   |                       |                       | 0.176<br>(<0.01301)      |                       |



|                         |                                                       |             |             |                      |             |
|-------------------------|-------------------------------------------------------|-------------|-------------|----------------------|-------------|
|                         | <i>Physician–patient ratio-R * nurse experience-R</i> |             |             | -0.287<br>(0.06606)  |             |
|                         | <i>Bed occupancy-R * Medical department</i>           |             |             | -0.104<br>(0.227104) |             |
| Intra class correlation | <u>ICC hospital ward level (2) (percent)</u>          | <u>5.68</u> | <u>2.46</u> | <u>5.35</u>          | <u>8.64</u> |
|                         | <u>ICC hospital level (3) (percent)</u>               | <u>0.56</u> | <u>0.72</u> | <u>0.22</u>          | <u>0.74</u> |

The multivariate multilevel model showed that Nurses' assessment reports of work-related outcome measures; Quality of Nursing, and Patient Safety, were associated with four of the organizational process measures; *patient safety management, staff adequacy, nurse–physician relation, and quality system* (table 5). For Quality of Nursing we found small but significant coefficients of nurse participation (negatively) and ward leadership (positively). We found positive associations between Working in a regional *regional university hospital* rather than a local hospital was associated with work-related outcome measures ~~and~~. Nurses affiliated ~~with~~ to surgical-medical departments gave lower ~~higher~~ ratings of Patient Safety than nurses working in ~~medical-surgical~~ departments.

The patient-related outcome measures; ~~Self-care ability~~ Self-Care Ability, and ~~Low-Frequent AE~~ Low frequency AE, were associated with the organizational process measures *patient safety management, staff adequacy*, and *quality system*. Self-Care Ability was associated with Nurse-physician relation (positively), and Low-Frequent AE Low frequency AE was associated with ward leadership (negatively). ~~variables~~ Self-care ~~Nurses working in a medical department reported poorer Self-Care Ability~~ medical department. Nurses working a local university hospital rather than a local hospital reported higher frequency of adverse events (reduced Low-Frequent AE Low frequency AE). The interactions included in the final model showed that index for patient mix reduced the negative effect of medical department on Self-

1  
2  
3 Care Ability. High nurse experience per hospital increased the effect of nurse-patient ratio on  
4  
5 Self-Care Ability. Except for medical department none of the main effects involved in the  
6  
7 interactions were significant.

8  
9  
10 Bed occupancy was negatively associated with patient outcomes, meaning that lower bed  
11  
12 occupancy gave higher (better) ratings for patient outcomes. Working in a local versus central  
13  
14 hospital gave higher ratings for Low frequent AE. Low frequency AE. Nurse experience was  
15  
16 positively associated with Low frequent AE. Low frequency AE. We found a negative but  
17  
18 marginal effect of ward leadership. Nurse-physician relationship and nurse-patient ratio were  
19  
20 positively associated with self-care ability, and working in a surgical department gave higher  
21  
22 ratings of self-care ability. Nurse experience R was negatively associated with self-care  
23  
24 ability. The positive effect of nurse-patient ratio was increased by lower nurse experience.  
25  
26 The interaction between physician-patient ratio and nurse experience gave opposite results.  
27  
28 Index for patient mix increased the effect of working in a surgical department.  
29  
30  
31

## 32 33 Discussion

### 34 35 36 <sup>43</sup>Main findings

37  
38  
39 Our findings suggest that organizational processes are associated with both work- and patient-  
40  
41 related outcome measures. Active programmes to ensure quality having sufficient staff to  
42  
43 provide quality of care ( Organisational process variables: quality system, patient safety  
44  
45 management, staff adequacy and nurse-physician relation were associated with nurse-  
46  
47 reported work- and patient- related outcomes. Not all process variables were associated with  
48  
49 the outcomes. The organisational structure variables medical department and hospital type  
50  
51 were associated with some of the nurse-reported outcomes.  
52  
53  
54  
55  
56  
57  
58  
59  
60

### Strengths and limitations

This study is based on data from one of the largest nurse surveys performed in Norway, and includes almost all Norwegian hospitals with more than 85 beds. Norwegian nurses give their workplaces better ratings of work environment and patient safety, and nurse-patient ratios are higher compared to other countries<sup>11</sup>. The good performance of Norwegian hospitals as assessed by nurses make it of particular interest to study the organisational design.

~~Methodological~~ Questions related to cross-sectional survey design are often addressed towards the inadequacy to prove causality. However, the intention of our study was not to add ~~proof evidence~~ of this kind, but to describe associations between how nurses' perceptions of work environment and their assessments of patient safety and quality of nursing. We have not made statistical controls to mitigate the risk of common method bias as the value of this is questioned<sup>47-51</sup>. The method for identifying the five-factor structure of nursing work index has been criticised, but is one of several ways to identify factor structure<sup>52</sup>. Internal consistency has been tested for both scales, and was higher for the six-factor structure identified in the present study and provided a nuanced description of work environment adapted to a Norwegian context<sup>36 38</sup>. ~~for exploratory provides a more nuanced description of processes in the work system~~ The questionnaires were distributed through the nurses' union representatives, and we have not been able to control whether perspectives of NNO have influenced the results. the survey results may have been affected by the distribution method. The sample of this study is a relevant population with a response rate of 58.9%, and the age distribution is corresponding with studies of similar populations from Norway<sup>53</sup>. The difference in age from nurses in the NNO database may be explained by exclusion of nurses in leader positions and part-time positions. Nurses' practice environments are complex and cannot be fully covered by a questionnaire, but overall the nursing work index is characterised as a "promising instrument"<sup>52,54</sup>. However, NWI is developed to evaluate nurse-reported job

1  
2  
3 outcomes, and the applicability of the instrument to patient safety outcome might be  
4 uncertain<sup>55</sup>. Statistics Norway and The Norwegian Directorate of Health are well-established  
5 registers with complete coverage. The high quality of their data collection has minimized the  
6 risk of inaccuracy of organisational structure variables and ensured the comparability between  
7 hospitals.

8  
9  
10  
11  
12  
13  
14 ~~participation~~ This may have influenced the results. The exploratory factor analysis of PES-  
15 NWI on the Norwegian data specified six subscales that differed slightly from the five-  
16 subscale set identified in previous studies<sup>35</sup>. were In the present study obtained from the same  
17 questionnaire—the survey design involves a risk of common method bias as all variables were.

18  
19  
20  
21  
22  
23  
24 Organisational process measures

25  
26  
27 Educational level has been associated with risk-adjusted patient mortality and failure to rescue  
28 within 30 days of admission<sup>56,57</sup>. Even though all Norwegian nurses hold a bachelor degree,  
29 we expected that education and career was associated with some of the outcome measures,  
30 but this was not the case. However, the association between quality system, involving issues  
31 as training for newly hired and continuity of nursing, and work- and patient- related outcomes  
32 This indicate that integrated training programmes are more important than nurses<sup>2</sup>  
33 opportunities for individual professional development and career advancement when it comes  
34 to how they perceive for patient safety and quality of nursing<sup>57</sup>. The subscale *quality system*  
35 also represents ~~ing~~ continuous processes such as presence of quality control programmes,  
36 systems for documentation, and nursing versus medical orientation. These findings are  
37 supported in a study from 1985 Haleystudies showing that quality programmes influence  
38 health care workers attitudes and increase improvement events<sup>58-61</sup>. The existence of  
39 standards, infrastructure and quality systems ~~might~~ contribute to expectations and  
40 predictability for the health professionals and maximize their efforts to avoid patient harm

1  
2  
3  
4  
5  
6  
7  
8  
9  
10  
11  
12  
13  
14  
15  
16  
17  
18  
19  
20  
21  
22  
23  
24  
25  
26  
27  
28  
29  
30  
31  
32  
33  
34  
35  
36  
37  
38  
39  
40  
41  
42  
43  
44  
45  
46  
47  
48  
49  
50  
51  
52  
53  
54  
55  
56  
57  
58  
59  
60

~~1,9,62 found that the presence of an infection control programme was a cost-effective measure to prevent nosocomial and increase improvement events<sup>32,33</sup>. The presence of routines and infrastructure related to information technology is critical for adequate documentation and coordination of care<sup>1,7</sup>. supported the important patient outcomes studies, but does not take into account the skill-mix of Norwegian hospitals<sup>44,45</sup>. Our study showed an association between all outcome measures and t~~

The impact of nurse leadership and a management that prioritizes patient safety has been emphasised in several studies<sup>10,40 63,64</sup>. Ward leadership was inconsistently associated with the outcomes in this study, but the leadership aspect was supported by the subscale *patient safety management*. In a recent study the authors found that engaged leadership strengthened both communication and teamwork and that these qualities of the organisation enhanced patient safety<sup>65</sup>. Communication and collegial discussions are important aspects to streamline workflow and procedures to ensure patient safety, and serve as sources for professional development<sup>66,67</sup>. The association between good nurse-physician relation and high -quality of care from other studies was supported in our findings<sup>68-71</sup>. The channels for communicating results from performance measurements and other patient safety messages require engagement from leaders on all levels, and should probably be formed by the preferences of the targeted health care profession.

~~involving discussion and feedback on adverse events and actions showing that patient safety has top priority<sup>50,51</sup>. The effects of audits and performance feedback on process have been confirmed in numerous studies, even though the results are et al. found that physicians rated institutional commitment to safety more positively than nurses did<sup>23</sup>. A possible explanation is that communication between hospital management and physicians functions more fluently. In our study patient safety management was associated with all outcome measures, which underlines the importance of well-functioning channels to communicate hospital~~

~~managements' engagement in patient safety to all health care professions. It is suggested that teamwork is fundamental to the administration of workflow deployment of resources is essential to patient safety<sup>66</sup>. This is supported by our findings showing a significant association between work and patient related outcomes and the subscale *staff adequacy*.~~

~~The subscale~~

~~*Staff adequacy* represent nurses' assessments of the possibility to get the work done, provide quality of care, and discuss problems related to care with colleagues. Processes that ensure adequate and targeted resource allocation may contribute to reduced length of stay, increase in ambulatory activity, as well as ensuring right competence at the right place and time<sup>72, 73</sup>.~~

~~Associations between staff ratios and patient outcomes such as failure to rescue, unplanned extubation, cardiac arrest, nosocomial infections, and risk-adjusted mortality have been found in several studies, indicating that staff levels are related to quality and patient safety<sup>15,19,21,74-77</sup>. Corresponding results have been shown in studies with nurse-reported outcome measures,~~

~~but was not confirmed by our study<sup>75-77</sup>. A possible reason for this is that nurse-patient ratios are high in Norway and that Norwegian nurses perceive work environment better than nurses in other countries<sup>11</sup>. This may indicate that passing a threshold for staff levels, challenges related to quality, and patient safety could be met on an organizational level<sup>11,23,78</sup>.<sup>57-59</sup>. ~~The~~~~

~~results are supported by international research suggesting that The Nurses' perceptions of staff adequacy were significant for all four outcome measures in the present study. Adequate and targeted resource allocation can contribute to reduced length of stay, increase in ambulatory activity, as well as ensuring right competence at the right place and time<sup>63</sup>. In the present study nurse-patient ratio was only associated with self-care ability. Bed occupancy was associated with patient related outcomes, indicating that workload has an impact on how nurses evaluate patient outcomes. In a qualitative study where hospital employees were invited to suggest patient safety interventions, increased staffing was ranked as the most~~

1  
2  
3 important measure<sup>32</sup>. ~~The absence of relationships between nurse staffing and nurse reported~~  
4 ~~outcomes in our study may be explained by the high nurse-patient ratios in Norway compared~~  
5 ~~to other countries.~~

6  
7  
8  
9  
10 In this study we found that nurses assess quality of nursing and patient safety a higher in  
11 ~~regional hospitals than in local hospitals, but this was not the case for nurse-assessed patient~~  
12 ~~outcomes~~

### 13 Organisational structure measures

14  
15  
16  
17  
18 Most of the organizational structures were not significantly associated with outcome variables  
19 when hospital and hospital ward was introduced as levels in the analysis. Hence, when  
20 affiliation to regional university hospitals remained significant, it may as well be explained by  
21 a strong common perception of the hospital performance as of hospital type. Regional  
22 university hospital was not associated with ~~The gap in results between work- and nurse-~~  
23 ~~reported~~ -patient-related outcomes implying that ~~may be explained by~~ nurses' perception of  
24 quality and safety may be good despite the type of care delivered and the risk for  
25 complications among patients in these hospitals. Associations between hospital type and  
26 patient safety indicators are inconsistently reported by other authors, ~~and it is that~~ suggested  
27 that features other than hospital type are more important for patient outcomes<sup>6,79,80</sup> regional  
28 hospitals. Even though complications happen more often. However,

29  
30  
31  
32  
33  
34  
35  
36  
37  
38  
39  
40  
41  
42  
43  
44  
45  
46 The negative association between Low-Frequency AE and local university  
47 hospital might confirm the assumption that common perception is a more decisive factor than  
48 hospital type. However, because of the small number of hospitals in this group, conditions in  
49 a single hospital might have influenced the results. Correlation on hospital and hospital ward  
50 levels were highest for Low-Frequency AE, indicating a stronger correlation

1  
2  
3 for this outcome on these levels, and we cannot rule out that our findings are related to  
4 resources, patients' severity and nurses' perceptions of risk of complications<sup>6</sup>.

5  
6  
7  
8 We found that nurses working in *medical departments* gave poorer ratings of patients' self  
9 care ability and that *medical department* interacted with *index for patient mix*. We lack  
10 information about patients' severity and DRG-weights on departmental level, but the  
11 complexity in diseases and comorbidity among elderly patients' may explain this result if the  
12 majority of them are admitted to medical departments. These consideration do not explain  
13 why being affiliated to a *medical department* was associated with nurse-reported Patient  
14 safety, but may indicate that patient safety interventions are easier to apply and make visible  
15 in surgical departments as the procedures are more standardized<sup>81</sup>.

#### 26 Final remarks

27  
28  
29  
30 The agreement of respondents within organisational levels (ICCs) was in accordance with  
31 similar studies reviewed by Park and Lake<sup>82</sup>. The culture of a group is formed by shared  
32 perceptions, thoughts and emotions, and a natural consequence is that the strongest correlation  
33 of nurses' assessments of organisational process variables was found at individual and  
34 hospital ward level<sup>39</sup>.

35  
36  
37  
38 Conclusion We conclude that organizational structure variables included in our study have  
39 minor impact on how nurses perceive work- and patient-related outcomes. However, ~~the~~ the  
40 organizational process variables consistently related to all outcomes measures indicated  
41 that there is a considerable potential to address organizational design in improvement of  
42 patient safety and quality of care. This study makes a contribution to knowledge about how  
43 interventions should be targeted towards nurses as one major ~~microsystem~~ micro system of the  
44 organization. Further research should also address organisational processes relevant for other  
45 professions. Our findings contribute to an understanding of how-



1  
2  
3 **Ethical approvals:** The method of data collection and handling was approved by the Data  
4 Protection Official for Research  
5  
6

7  
8 **Acknowledgements:** The authors would like to thank all Norwegian nurses that responded  
9 on the nurse survey.  
10  
11

12  
13 **Competing interests:** None  
14  
15

16 **Funding:** Data were collected by Norwegian Nurses' Organisation and Norwegian  
17 Knowledge Centre for the Health Services in collaboration. Christine Tvedt was supported by  
18 a grant from Norwegian Nurses' organisation.  
19  
20  
21  
22

23 **Data sharing statement:** The data set is available at The Norwegian Knowledge Centre for  
24 the Health Services, and requests should be addressed by emailing [cht@nokc.no](mailto:cht@nokc.no)  
25  
26  
27  
28  
29

30  
31  
32 Reference List  
33  
34  
35

- 36  
37 1 Committee on Quality of Health Care in America. Crossing the quality chasm : a new health  
38 system for the 21st century. Washington, D.C.: National Academy Press; 2001.  
39  
40 2 Wong Jiahui, Beglaryan Hasmik. Strategies for Hospitals to Improve Patient Safety: A Review of  
41 the Research. 2004. The Change Foundation.  
42 Ref Type: Report  
43  
44 3 Leape L, Berwick D, Clancy C et al. Transforming healthcare: a safety imperative. *Qual Saf*  
45 *Health Care* 2009; 18(6):424-428.  
46  
47 4 Hearld LR, Alexander JA, Fraser I et al. Review: how do hospital organizational structure and  
48 processes affect quality of care?: a critical review of research methods. *Med Care Res Rev*  
49 2008; 65(3):259-299.  
50  
51 5 Zohar D. Thirty years of safety climate research: reflections and future directions. *Accid Anal*  
52 *Prev* 2010; 42(5):1517-1522.  
53  
54 6 Rivard PE, Elixhauser A, Christiansen CL et al. Testing the association between patient safety  
55 indicators and hospital structural characteristics in VA and nonfederal hospitals. *Med Care Res*  
56 *Rev* 2010; 67(3):321-341.  
57  
58  
59  
60

- 1
- 2
- 3 7 Battles JB, Lilford RJ. Organizing patient safety research to identify risks and hazards. *Qual Saf Health Care* 2003; 12 Suppl 2:ii2-ii7.
- 4
- 5
- 6 8 Donabedian A. An introduction to quality assurance in health care. New York: Oxford University Press; 2003.
- 7
- 8
- 9 9 Battles JB. Quality and safety by design. *Qual Saf Health Care* 2006; 15 Suppl 1:i1-i3.
- 10
- 11 10 Cummings G. The call for leadership to influence patient outcomes. *Nurs Leadersh (Tor Ont )*
- 12 2011; 24(2):22-25.
- 13
- 14 11 Aiken LH, Sermeus W, Van den Heede K et al. Patient safety, satisfaction, and quality of
- 15 hospital care: cross sectional surveys of nurses and patients in 12 countries in Europe and the
- 16 United States. *BMJ* 2012; 344:e1717.
- 17
- 18 12 Wallace JE, Lemaire JB, Ghali WA. Physician wellness: a missing quality indicator. *Lancet* 2009;
- 19 374(9702):1714-1721.
- 20
- 21 13 Hickam DH, Severance S, Feldstein A et al. The effect of health care working conditions on
- 22 patient safety. *Evid Rep Technol Assess (Summ )* 2003;(74):1-3.
- 23
- 24 14 Grol R. Changing physicians' competence and performance: finding the balance between the
- 25 individual and the organization. *J Contin Educ Health Prof* 2002; 22(4):244-251.
- 26
- 27 15 Stone PW, Mooney-Kane C, Larson EL et al. Nurse Working Conditions and Patient Safety
- 28 Outcomes. *Med Care* 2007; 45(6):571-578.
- 29
- 30 16 Cummings GG, Midodzi WK, Wong CA et al. The contribution of hospital nursing leadership
- 31 styles to 30-day patient mortality. *Nurs Res* 2010; 59(5):331-339.
- 32
- 33 17 Aiken LH, Clarke SP, Sloane DM et al. Effects of hospital care environment on patient mortality
- 34 and nurse outcomes. *J Nurs Adm* 2008; 39(7-8 Suppl):S45-S51.
- 35
- 36 18 Estabrooks CA, Midodzi WK, Cummings GG et al. The impact of hospital nursing characteristics
- 37 on 30-day mortality. *Nurs Res* 2005; 54(2):74-84.
- 38
- 39 19 Needleman J, Buerhaus P, Pankratz VS et al. Nurse staffing and inpatient hospital mortality. *N*
- 40 *Engl J Med* 2011; 364(11):1037-1045.
- 41
- 42 20 Blegen MA, Goode CJ, Reed L. Nurse staffing and patient outcomes. *Nurs Res* 1998; 47(1):43-
- 43 50.
- 44
- 45 21 Kane RL, Shamliyan TA, Mueller C et al. The Association of Registered Nurse Staffing Levels and
- 46 Patient Outcomes: Systematic Review and Meta-Analysis. *Med Care* 2007; 45(12):1195-1204.
- 47
- 48 22 Singer SJ, Gaba DM, Falwell A et al. Patient safety climate in 92 US hospitals: differences by
- 49 work area and discipline. *Med Care* 2009; 47(1):23-31.
- 50
- 51 23 Carayon P, Schoofs HA, Karsh BT et al. Work system design for patient safety: the SEIPS model.
- 52 *Qual Saf Health Care* 2006; 15 Suppl 1:i50-i58.
- 53
- 54
- 55
- 56
- 57
- 58
- 59
- 60

- 1  
2  
3 24 Westbrook MT, Braithwaite J, Travaglia JF et al. Promoting safety: longer-term responses of  
4 three health professional groups to a safety improvement programme. *Int J Health Care Qual*  
5 *Assur* 2007; 20(7):555-571.  
6  
7 25 Listyowardojo TA, Nap RE, Johnson A. Variations in hospital worker perceptions of safety  
8 culture. *Int J Qual Health Care* 2012; 24(1):9-15.  
9  
10 26 Gallego B, Westbrook MT, Dunn AG et al. Investigating patient safety culture across a health  
11 system: multilevel modelling of differences associated with service types and staff  
12 demographics. *Int J Qual Health Care* 2012.  
13  
14 27 Travaglia JF, Westbrook MT, Braithwaite J. Implementation of a patient safety incident  
15 management system as viewed by doctors, nurses and allied health professionals. *Health*  
16 *(London)* 2009; 13(3):277-296.  
17  
18 28 McHugh MD, Stimpfel AW. Nurse reported quality of care: A measure of hospital quality. *Res*  
19 *Nurs Health* 2012.  
20  
21 29 Shang J, Friese CR, Wu E et al. Nursing Practice Environment and Outcomes for Oncology  
22 Nursing. *Cancer Nurs* 2012.  
23  
24 30 Van BP, Clarke S, Roelant E et al. Impacts of unit-level nurse practice environment and burnout  
25 on nurse-reported outcomes: a multilevel modelling approach. *J Clin Nurs* 2010; 19(11-  
26 12):1664-1674.  
27  
28 31 Ausserhofer D, Schubert M, Engberg S et al. Nurse-reported patient safety climate in Swiss  
29 hospitals: a descriptive-explorative substudy of the Swiss RN4CAST study. *Swiss Med Wkly*  
30 2012; 142:0.  
31  
32 32 Aiken LH, Clarke SP, Sloane DM et al. Nurses' reports on hospital care in five countries. *Health*  
33 *Aff (Millwood )* 2001; 20(3):43-53.  
34  
35 33 Aiken LH, Clarke SP, Sloane DM. Hospital staffing, organization, and quality of care: cross-  
36 national findings. *Int J Qual Health Care* 2002; 14(1):5-13.  
37  
38 34 Braithwaite J, Westbrook MT, Robinson M et al. Improving patient safety: the comparative  
39 views of patient-safety specialists, workforce staff and managers. *BMJ Qual Saf* 2011;  
40 20(5):424-431.  
41  
42 35 Warren CR, Landis RS. One is the loneliest number: A meta-analytic investigation on single-item  
43 measure fidelity . *Ergometrika* 2007; 4(1):32-35.  
44  
45 36 Lake ET. Development of the practice environment scale of the Nursing Work Index. *Res Nurs*  
46 *Health* 2002; 25(3):176-188.  
47  
48 37 Blegen MA, Gearhart S, O'Brien R et al. AHRQ's hospital survey on patient safety culture:  
49 psychometric analyses. *J Patient Saf* 2009; 5(3):139-144.  
50  
51 38 Sjetne IS, Tvedt C, Squires A. Måleinstrumentet "The Nursing Work Index-Revised" -  
52 oversettelse og utprøving av en norsk versjon. ["The Nursing Work Index-Revised" -Instrument  
53 translation and assessment of a Norwegian version]. *Sykepleien Forskning* 2011; 6(4):358-365.  
54  
55 39 Schein EH. Organizational culture and leadership. San Francisco: Jossey-Bass; 2004.  
56  
57  
58  
59  
60

- 1  
2  
3 40 Wong CA, Cummings GG. The relationship between nursing leadership and patient outcomes: a  
4 systematic review. *J Nurs Manag* 2007; 15(5):508-521.  
5  
6 41 Huseby, B (red). Specialist health care services 2009 (SAMDATA). 2010. Oslo, The Norwegian  
7 Directorate of Health. 978.  
8 Ref Type: Report  
9  
10 42 Statistics Norway. Statbank. 2012 Available from:  
11 URL:<http://statbank.ssb.no/statistikkbanken/>  
12  
13 43 West E. Management matters: the link between hospital organisation and quality of patient  
14 care. *Qual Health Care* 2001; 10(1):40-48.  
15  
16 44 Taylor SL, Dy S, Foy R et al. What context features might be important determinants of the  
17 effectiveness of patient safety practice interventions? *BMJ Qual Saf* 2011; 20(7):611-617.  
18  
19 45 Dy SM, Taylor SL, Carr LH et al. A framework for classifying patient safety practices: results  
20 from an expert consensus process. *BMJ Qual Saf* 2011; 20(7):618-624.  
21  
22 46 Kramer M, Schmalenberg C, Brewer BB et al. Accurate assessment of clinical nurses' work  
23 environments: response rate needed. *Res Nurs Health* 2009; 32(2):229-240.  
24  
25 47 Spector PE, Brannick MT. Common Method Issues: An Introduction to the Feature Topic in  
26 Organizational Research Methods. *Organizational Research Methods* 2010; 13(3):403-406.  
27  
28 48 Conway JM, Lance CE. What Reviewers Should Expect from Authors Regarding Common  
29 Method Bias in Organizational Research. *Journal of Business and Psychology (J Bus Psychol)*  
30 2010; 25:325-334.  
31  
32 49 Brannick MT, Chan D, Conway JM et al. What is Method Variance and How Can We Cope With  
33 It? A Panel Discussion. *Organizational Research Methods* 2010; 13(3):407-420.  
34  
35 50 Lance CE, Dawson P, Birkelbach D et al. Method Effects, Measurement Error, and Substantive  
36 Conclusions. *Organizational Research Methods* 2011; 13(3):435-455.  
37  
38 51 Siemsen E, Roth A, Oliveira P. Common Method Bias in Regression Models With Linear,  
39 Quadratic, and Interaction Effects. *Organizational Research Methods* 2010; 13(3):456-476.  
40  
41 52 Cummings GG, Hayduk L, Estabrooks CA. Is the Nursing Work Index Measuring Up?: Moving  
42 Beyond Estimating Reliability to Testing Validity. *Nurs Res* 2006; 55(2):82-93.  
43  
44 53 Sjetne IS, Veenstra M, Ellefsen B et al. Service quality in hospital wards with different nursing  
45 organization: nurses' ratings. *J Adv Nurs* 2009; 65(2):325-336.  
46  
47 54 Bonnetterre V, Liaudy S, Chatellier G et al. Reliability, validity, and health issues arising from  
48 questionnaires used to measure Psychosocial and Organizational Work Factors (POWFs) among  
49 hospital nurses: a critical review. *J Nurs Meas* 2008; 16(3):207-230.  
50  
51 55 Zohar D. Safety climate in industrial organizations: theoretical and applied implications. *J Appl*  
52 *Psychol* 1980; 65(1):96-102.  
53  
54 56 Aiken LH, Clarke SP, Cheung RB et al. Educational levels of hospital nurses and surgical patient  
55 mortality. *JAMA* 2003; 290(12):1617-1623.  
56  
57  
58  
59  
60

- 1  
2  
3 57 McAlearney AS, Garman AN, Song PH et al. High-performance work systems in health care  
4 management, part 2: qualitative evidence from five case studies. *Health Care Manage Rev*  
5 2011; 36(3):214-226.  
6  
7 58 Haley RW, Quade D, Freeman HE et al. The SENIC Project. Study on the efficacy of nosocomial  
8 infection control (SENIC Project). Summary of study design. *Am J Epidemiol* 1980; 111(5):472-  
9 485.  
10  
11 59 Naveh E, Stem Z. How quality improvement programs can affect general hospital performance.  
12 *Int J Health Care Qual Assur Inc Leadersh Health Serv* 2005; 18(4-5):249-270.  
13  
14 60 Maguerez G, Erbault M, Terra JL et al. Evaluation of 60 continuous quality improvement  
15 projects in French hospitals. *Int J Qual Health Care* 2001; 13(2):89-97.  
16  
17 61 Tvedt C, Bukholm G. Healthcare workers' self-reported effect of an interventional programme  
18 on knowledge and behaviour related to infection control. *Qual Saf Health Care* 2010; 19(6):e7.  
19  
20 62 Kohn, L.T, Corrigan JM, Donaldson MSe. To err is human : building a safer health system.  
21 Washington, D.C.: National Academy Press; 2000.  
22  
23 63 Goeschel CA, Wachter RM, Pronovost PJ. Responsibility for quality improvement and patient  
24 safety: hospital board and medical staff leadership challenges. *Chest* 2010; 138(1):171-178.  
25  
26 64 Conway J. Getting boards on board: engaging governing boards in quality and safety. *Jt Comm J*  
27 *Qual Patient Saf* 2008; 34(4):214-220.  
28  
29 65 Castner J, Foltz-Ramos K, Schwartz DG et al. A Leadership Challenge: Staff Nurse Perceptions  
30 After an Organizational TeamSTEPS Initiative. *J Nurs Adm* 2012; 42(10):467-472.  
31  
32 66 Quick J. Modern perioperative teamwork: an opportunity for interprofessional learning. *J*  
33 *Perioper Pract* 2011; 21(11):387-390.  
34  
35 67 West P, Sculli G, Fore A et al. Improving Patient Safety and Optimizing Nursing Teamwork Using  
36 Crew Resource Management Techniques. *J Nurs Adm* 2012; 42(1):15-20.  
37  
38 68 Manser T. Teamwork and patient safety in dynamic domains of healthcare: a review of the  
39 literature. *Acta Anaesthesiol Scand* 2009; 53(2):143-151.  
40  
41 69 Auerbach AD, Sehgal NL, Blegen MA et al. Effects of a multicentre teamwork and  
42 communication programme on patient outcomes: results from the Triad for Optimal Patient  
43 Safety (TOPS) project. *BMJ Qual Saf* 2011.  
44  
45 70 Baker DP, Day R, Salas E. Teamwork as an essential component of high-reliability organizations.  
46 *Health Serv Res* 2006; 41(4 Pt 2):1576-1598.  
47  
48 71 Schmalenberg C, Kramer M. Nurse-physician relationships in hospitals: 20,000 nurses tell their  
49 story. *Crit Care Nurse* 2009; 29(1):74-83.  
50  
51 72 Christianson MK, Sutcliffe KM, Miller MA et al. Becoming a high reliability organization. *Crit*  
52 *Care* 2011; 15(6):314.  
53  
54  
55  
56  
57  
58  
59  
60

- 1  
2  
3 73 Allen D, Rixson L. How has the impact of 'care pathway technologies' on service integration in  
4 stroke care been measured and what is the strength of the evidence to support their  
5 effectiveness in this respect? *Int J Evid Based Healthc* 2008; 6(1):78-110.  
6  
7 74 Pronovost P, Needham D, Berenholtz S et al. An intervention to decrease catheter-related  
8 bloodstream infections in the ICU. *N Engl J Med* 2006; 355(26):2725-2732.  
9  
10 75 Tervo-Heikkinen T, Kiviniemi V, Partanen P et al. Nurse staffing levels and nursing outcomes: a  
11 Bayesian analysis of Finnish-registered nurse survey data. *J Nurs Manag* 2009; 17(8):986-993.  
12  
13 76 Djukic M, Kovner CT, Brewer CS et al. Work environment factors other than staffing associated  
14 with nurses' ratings of patient care quality. *Health Care Manage Rev* 2011.  
15  
16 77 Gunnarsdottir S, Clarke SP, Rafferty AM et al. Front-line management, staffing and nurse-  
17 doctor relationships as predictors of nurse and patient outcomes. A survey of Icelandic hospital  
18 nurses. *Int J Nurs Stud* 2007.  
19  
20 78 Shekelle PG, Pronovost PJ, Wachter RM et al. Advancing the science of patient safety. *Ann*  
21 *Intern Med* 2011; 154(10):693-696.  
22  
23 79 Thornlow DK, Stukenborg GJ. The association between hospital characteristics and rates of  
24 preventable complications and adverse events. *Med Care* 2006; 44(3):265-269.  
25  
26 80 Sjetne IS, Veenstra M, Stavem K. The effect of hospital size and teaching status on patient  
27 experiences with hospital care: a multilevel analysis. *Med Care* 2007; 45(3):252-258.  
28  
29 81 El-Jardali F, Dimassi H, Jamal D et al. Predictors and outcomes of patient safety culture in  
30 hospitals. *BMC Health Serv Res* 2011; 11:45.  
31  
32 82 Park S, Lake ET. Multilevel modeling of a clustered continuous outcome: nurses' work hours  
33 and burnout. *Nurs Res* 2005; 54(6):406-413.  
34  
35  
36  
37  
38  
39  
40  
41  
42  
43  
44  
45  
46  
47  
48  
49  
50  
51  
52  
53  
54  
55  
56  
57  
58  
59  
60

1  
2  
3  
4  
5  
6  
7  
8  
9  
10  
11  
12  
13  
14  
15  
16  
17  
18  
19  
20  
21  
22  
23  
24  
25  
26  
27  
28  
29  
30  
31  
32  
33  
34  
35  
36  
37  
38  
39  
40  
41  
42  
43  
44  
45  
46  
47  
48  
49  
50  
51  
52  
53  
54  
55  
56  
57  
58  
59  
60

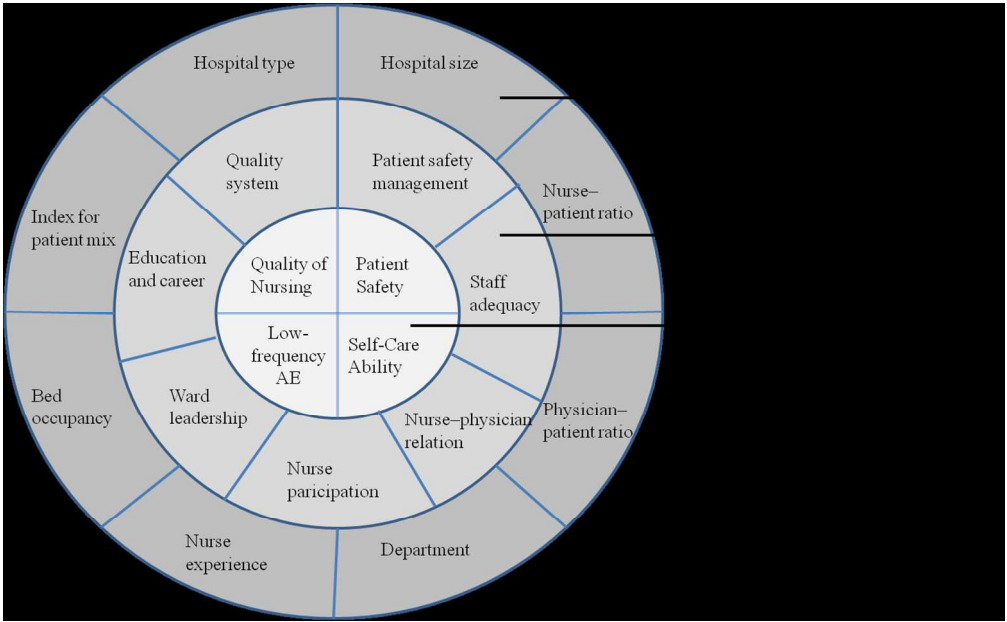

Modification of Battles' model to illustrate the understanding of structure, process and outcome in this context.  
 246x151mm (150 x 150 DPI)

Review only



| Items of nursing work index                                                              | Six-factor structure of Norwegian dataset |                                         |                |                 |                | Five-factor structure of Lake et al. |                                         |                                         |                                                          |                                |                                     |
|------------------------------------------------------------------------------------------|-------------------------------------------|-----------------------------------------|----------------|-----------------|----------------|--------------------------------------|-----------------------------------------|-----------------------------------------|----------------------------------------------------------|--------------------------------|-------------------------------------|
|                                                                                          | Education and career possibilities        | Nurse participation in hospital affairs | Quality system | Ward leadership | Staff adequacy | Nurse physician relation             | Nurse Participation in Hospital Affairs | Nursing Foundations for Quality of Care | Nurse Manager Ability, Leadership, and Support of Nurses | Staffing and Resource Adequacy | Collegial Nurse-Physician Relations |
| 1. Årsak til å bli ansatt på avdelingen                                                  | None                                      |                                         |                |                 |                |                                      | Yes                                     |                                         |                                                          |                                |                                     |
| 2. Årsak til å bli ansatt på avdelingen                                                  | None                                      |                                         |                |                 |                |                                      | Yes                                     |                                         |                                                          |                                |                                     |
| 3. Årsak til å bli ansatt på avdelingen                                                  | None                                      |                                         |                |                 |                |                                      | Yes                                     |                                         |                                                          |                                |                                     |
| 4. Årsak til å bli ansatt på avdelingen                                                  | None                                      |                                         |                |                 |                |                                      | Yes                                     |                                         |                                                          |                                |                                     |
| 5. Årsak til å bli ansatt på avdelingen                                                  | None                                      |                                         |                |                 |                |                                      | Yes                                     |                                         |                                                          |                                |                                     |
| 6. Årsak til å bli ansatt på avdelingen                                                  | None                                      |                                         |                |                 |                |                                      | Yes                                     |                                         |                                                          |                                |                                     |
| 7. Årsak til å bli ansatt på avdelingen                                                  | None                                      |                                         |                |                 |                |                                      | Yes                                     |                                         |                                                          |                                |                                     |
| 8. Årsak til å bli ansatt på avdelingen                                                  | None                                      |                                         |                |                 |                |                                      | Yes                                     |                                         |                                                          |                                |                                     |
| 9. Årsak til å bli ansatt på avdelingen                                                  | None                                      |                                         |                |                 |                |                                      | Yes                                     |                                         |                                                          |                                |                                     |
| 10. Årsak til å bli ansatt på avdelingen                                                 | None                                      |                                         |                |                 |                |                                      | Yes                                     |                                         |                                                          |                                |                                     |
| 11. Årsak til å bli ansatt på avdelingen                                                 | None                                      |                                         |                |                 |                |                                      | Yes                                     |                                         |                                                          |                                |                                     |
| 12. Årsak til å bli ansatt på avdelingen                                                 | None                                      |                                         |                |                 |                |                                      | Yes                                     |                                         |                                                          |                                |                                     |
| 13. Årsak til å bli ansatt på avdelingen                                                 | None                                      |                                         |                |                 |                |                                      | Yes                                     |                                         |                                                          |                                |                                     |
| 14. Årsak til å bli ansatt på avdelingen                                                 | None                                      |                                         |                |                 |                |                                      | Yes                                     |                                         |                                                          |                                |                                     |
| 15. Årsak til å bli ansatt på avdelingen                                                 | None                                      |                                         |                |                 |                |                                      | Yes                                     |                                         |                                                          |                                |                                     |
| 16. Årsak til å bli ansatt på avdelingen                                                 | None                                      |                                         |                |                 |                |                                      | Yes                                     |                                         |                                                          |                                |                                     |
| 17. Årsak til å bli ansatt på avdelingen                                                 | None                                      |                                         |                |                 |                |                                      | Yes                                     |                                         |                                                          |                                |                                     |
| 18. Årsak til å bli ansatt på avdelingen                                                 | None                                      |                                         |                |                 |                |                                      | Yes                                     |                                         |                                                          |                                |                                     |
| 19. Årsak til å bli ansatt på avdelingen                                                 | None                                      |                                         |                |                 |                |                                      | Yes                                     |                                         |                                                          |                                |                                     |
| 20. Årsak til å bli ansatt på avdelingen                                                 | None                                      |                                         |                |                 |                |                                      | Yes                                     |                                         |                                                          |                                |                                     |
| 21. Årsak til å bli ansatt på avdelingen                                                 | None                                      |                                         |                |                 |                |                                      | Yes                                     |                                         |                                                          |                                |                                     |
| 22. Årsak til å bli ansatt på avdelingen                                                 | None                                      |                                         |                |                 |                |                                      | Yes                                     |                                         |                                                          |                                |                                     |
| 23. Årsak til å bli ansatt på avdelingen                                                 | None                                      |                                         |                |                 |                |                                      | Yes                                     |                                         |                                                          |                                |                                     |
| 24. Årsak til å bli ansatt på avdelingen                                                 | None                                      |                                         |                |                 |                |                                      | Yes                                     |                                         |                                                          |                                |                                     |
| 25. Årsak til å bli ansatt på avdelingen                                                 | None                                      |                                         |                |                 |                |                                      | Yes                                     |                                         |                                                          |                                |                                     |
| 26. Årsak til å bli ansatt på avdelingen                                                 | None                                      |                                         |                |                 |                |                                      | Yes                                     |                                         |                                                          |                                |                                     |
| 27. Årsak til å bli ansatt på avdelingen                                                 | None                                      |                                         |                |                 |                |                                      | Yes                                     |                                         |                                                          |                                |                                     |
| 28. Årsak til å bli ansatt på avdelingen                                                 | None                                      |                                         |                |                 |                |                                      | Yes                                     |                                         |                                                          |                                |                                     |
| 29. Årsak til å bli ansatt på avdelingen                                                 | None                                      |                                         |                |                 |                |                                      | Yes                                     |                                         |                                                          |                                |                                     |
| 30. Årsak til å bli ansatt på avdelingen                                                 | None                                      |                                         |                |                 |                |                                      | Yes                                     |                                         |                                                          |                                |                                     |
| 31. Årsak til å bli ansatt på avdelingen                                                 | None                                      |                                         |                |                 |                |                                      | Yes                                     |                                         |                                                          |                                |                                     |
| 32. Årsak til å bli ansatt på avdelingen                                                 | None                                      |                                         |                |                 |                |                                      | Yes                                     |                                         |                                                          |                                |                                     |
| 33. Årsak til å bli ansatt på avdelingen                                                 | None                                      |                                         |                |                 |                |                                      | Yes                                     |                                         |                                                          |                                |                                     |
| 34. Årsak til å bli ansatt på avdelingen                                                 | None                                      |                                         |                |                 |                |                                      | Yes                                     |                                         |                                                          |                                |                                     |
| 35. Årsak til å bli ansatt på avdelingen                                                 | None                                      |                                         |                |                 |                |                                      | Yes                                     |                                         |                                                          |                                |                                     |
| 36. Årsak til å bli ansatt på avdelingen                                                 | None                                      |                                         |                |                 |                |                                      | Yes                                     |                                         |                                                          |                                |                                     |
| 37. Årsak til å bli ansatt på avdelingen                                                 | None                                      |                                         |                |                 |                |                                      | Yes                                     |                                         |                                                          |                                |                                     |
| 38. Årsak til å bli ansatt på avdelingen                                                 | None                                      |                                         |                |                 |                |                                      | Yes                                     |                                         |                                                          |                                |                                     |
| 39. Items of nursing work index that are not included in the Norwegians questionnaire or |                                           |                                         |                |                 |                |                                      |                                         |                                         |                                                          |                                |                                     |
| 40. Årsak til å bli ansatt på avdelingen                                                 |                                           |                                         |                |                 |                |                                      | Yes                                     |                                         |                                                          |                                |                                     |
| 41. Årsak til å bli ansatt på avdelingen                                                 |                                           |                                         |                |                 |                |                                      | Yes                                     |                                         |                                                          |                                |                                     |
| 42. Årsak til å bli ansatt på avdelingen                                                 |                                           |                                         |                |                 |                |                                      | Yes                                     |                                         |                                                          |                                |                                     |
| 43. Årsak til å bli ansatt på avdelingen                                                 |                                           |                                         |                |                 |                |                                      | Yes                                     |                                         |                                                          |                                |                                     |
| 44. Årsak til å bli ansatt på avdelingen                                                 |                                           |                                         |                |                 |                |                                      | Yes                                     |                                         |                                                          |                                |                                     |

Comparison of PES-NWI and subscales identified from Norwegian data  
232x276mm (96 x 96 DPI)



Figure 2 Subscales from the Norwegian (Norw) dataset and from the study of Lake  
(Lake)

| Items of nursing work index                                                                                                     | Six-factor structure of Norwegian dataset |                                         |                |                 |                | Five-factor structure of Lake et al. |                                         |                                         |                                                          |                                |                                     |
|---------------------------------------------------------------------------------------------------------------------------------|-------------------------------------------|-----------------------------------------|----------------|-----------------|----------------|--------------------------------------|-----------------------------------------|-----------------------------------------|----------------------------------------------------------|--------------------------------|-------------------------------------|
|                                                                                                                                 | Education and career possibilities        | Nurse participation in hospital affairs | Quality system | Ward leadership | Staff adequacy | Nurse physician relation             | Nurse Participation in Hospital Affairs | Nursing Foundations for Quality of Care | Nurse Manager Ability, Leadership, and Support of Nurses | Staffing and Resource Adequacy | Collegial Nurse-Physician Relations |
| <b>Included in the Norwegian version</b>                                                                                        |                                           |                                         |                |                 |                |                                      |                                         |                                         |                                                          |                                |                                     |
| Career development/clinical ladder opportunity                                                                                  | Norw                                      |                                         |                |                 |                |                                      | Lake                                    |                                         |                                                          |                                |                                     |
| A supervisory staff that is supportive of the nurses                                                                            | Norw                                      |                                         |                |                 |                |                                      |                                         |                                         | Lake                                                     |                                |                                     |
| Active staff development or continuing education programs for nurses                                                            | Norw                                      |                                         |                |                 |                |                                      |                                         | Lake                                    |                                                          |                                |                                     |
| Opportunities for advancement                                                                                                   | Norw                                      |                                         |                |                 |                |                                      | Lake                                    |                                         |                                                          |                                |                                     |
| Opportunity for staff nurses to participate in policy decisions                                                                 |                                           | Norw                                    |                |                 |                |                                      | Lake                                    |                                         |                                                          |                                |                                     |
| A chief nursing officer who is highly visible and accessible to staff                                                           |                                           | Norw                                    |                |                 |                |                                      | Lake                                    |                                         |                                                          |                                |                                     |
| A chief nursing officer equal in power and authority to other top-level hospital executives                                     |                                           | Norw                                    |                |                 |                |                                      | Lake                                    |                                         |                                                          |                                |                                     |
| Staff nurses are involved in the internal governance of the hospital (e.g., practice and policy committees)                     |                                           | Norw                                    |                |                 |                |                                      | Lake                                    |                                         |                                                          |                                |                                     |
| Staff nurses have the opportunity to serve on hospital and nursing committees                                                   |                                           | Norw                                    |                |                 |                |                                      | Lake                                    |                                         |                                                          |                                |                                     |
| A clear philosophy of nursing that pervades the patient care environment                                                        |                                           |                                         | Norw           |                 |                |                                      |                                         | Lake                                    |                                                          |                                |                                     |
| Working with nurses who are clinically competent                                                                                |                                           |                                         | Norw           |                 |                |                                      |                                         | Lake                                    |                                                          |                                |                                     |
| An active quality assurance program                                                                                             |                                           |                                         | Norw           |                 |                |                                      |                                         | Lake                                    |                                                          |                                |                                     |
| A preceptor program for newly-hired RNs                                                                                         |                                           |                                         | Norw           |                 |                |                                      |                                         | Lake                                    |                                                          |                                |                                     |
| Nursing care is based on a nursing, rather than a medical, model                                                                |                                           |                                         | Norw           |                 |                |                                      |                                         | Lake                                    |                                                          |                                |                                     |
| Written, up-to-date nursing care plans for all patients                                                                         |                                           |                                         | Norw           |                 |                |                                      |                                         | Lake                                    |                                                          |                                |                                     |
| Patient care assignments that foster continuity of care, i.e., the same nurse cares for the patient from admission to discharge |                                           |                                         | Norw           |                 |                |                                      |                                         | Lake                                    |                                                          |                                |                                     |
| A nurse manager who is a good manager and leader                                                                                |                                           |                                         |                | Norw            |                |                                      |                                         |                                         | Lake                                                     |                                |                                     |
| Praise and recognition for a job well done                                                                                      |                                           |                                         |                | Norw            |                |                                      |                                         |                                         |                                                          | Lake                           |                                     |
| A nurse manager who backs up the nursing staff in decision making, even if the conflict is with a physician                     |                                           |                                         |                | Norw            |                |                                      |                                         |                                         |                                                          | Lake                           |                                     |
| Administration that listens and responds to employee concerns                                                                   |                                           |                                         |                | Norw            |                |                                      | Lake                                    |                                         |                                                          |                                |                                     |
| Enough time and opportunity to discuss patient care problems with other nurses                                                  |                                           |                                         |                |                 | Norw           |                                      |                                         |                                         |                                                          | Lake                           |                                     |
| Enough registered nurses to provide quality patient care                                                                        |                                           |                                         |                |                 | Norw           |                                      |                                         |                                         |                                                          | Lake                           |                                     |
| Enough staff to get the work done                                                                                               |                                           |                                         |                |                 | Norw           |                                      |                                         |                                         |                                                          | Lake                           |                                     |
| Physicians and nurses have good working relationships                                                                           |                                           |                                         |                |                 |                | Norw                                 |                                         |                                         |                                                          |                                | Lake                                |
| A lot of team work between nurses and physicians                                                                                |                                           |                                         |                |                 |                | Norw                                 |                                         |                                         |                                                          |                                | Lake                                |
| Collaboration (joint practice) between nurses and physicians                                                                    |                                           |                                         |                |                 |                | Norw                                 |                                         |                                         |                                                          |                                | Lake                                |
| Physicians value nurses' observations and judgments                                                                             |                                           |                                         |                |                 |                | Norw                                 |                                         |                                         |                                                          |                                | Not incl.                           |
| Physicians recognize nurses' contributions to patient care                                                                      |                                           |                                         |                |                 |                | Norw                                 |                                         |                                         |                                                          |                                | Not incl.                           |
| Physicians respect nurses as professionals                                                                                      |                                           |                                         |                |                 |                | Norw                                 |                                         |                                         |                                                          |                                | Not incl.                           |
| Physicians hold nurses in high esteem                                                                                           |                                           |                                         |                |                 |                | Norw                                 |                                         |                                         |                                                          |                                | Not incl.                           |
| <b>Items of nursing work index that are not included in the Norwegian questionnaire or</b>                                      |                                           |                                         |                |                 |                |                                      |                                         |                                         |                                                          |                                |                                     |
| Use of nursing diagnosis                                                                                                        |                                           |                                         |                |                 |                |                                      |                                         | Lake                                    |                                                          |                                |                                     |
| High standards of nursing care are expected by the administration                                                               |                                           |                                         |                |                 |                |                                      |                                         | Lake                                    |                                                          |                                |                                     |
| Supervisors use mistakes as learning opportunities, not criticism                                                               |                                           |                                         |                |                 |                |                                      |                                         |                                         | Lake                                                     |                                |                                     |
| Adequate support services allow me to spend time with my patients                                                               |                                           |                                         |                |                 |                |                                      |                                         |                                         |                                                          | Lake                           |                                     |
| Nursing administrators consult with staff on daily problems and procedures                                                      |                                           |                                         |                |                 |                |                                      | Lake                                    |                                         |                                                          |                                |                                     |

Table 4 Univariate linear regression (online-only)

|                                          | <b>Quality of nursing</b> | <b>Patient safety</b> | <b>Self-care ability</b> | <b>Absence of adverse events</b> |
|------------------------------------------|---------------------------|-----------------------|--------------------------|----------------------------------|
|                                          | Coefficient (p-value)     | Coefficient (p-value) | Coefficient (p-value)    | Coefficient (p-value)            |
| Patient safety management                | 0.29 (<0.001)             | 0.35 (<0.001)         | 0.30 (<0.001)            | 0.10 (<0.001)                    |
| Adequate staffing                        | 0.29 (<0.001)             | 0.28 (<0.001)         | 0.26 (<0.001)            | 0.10 (<0.001)                    |
| Nurse physician relation                 | 0.22 (<0.001)             | 0.22 (<0.001)         | 0.18 (<0.001)            | 0.06 (<0.001)                    |
| Education and career possibilities       | 0.24 (<0.001)             | 0.23 (<0.001)         | 0.20 (<0.001)            | 0.05 (<0.001)                    |
| Quality system                           | 0.43 (<0.001)             | 0.41 (<0.001)         | 0.40 (<0.001)            | 0.14 (<0.001)                    |
| Nurse representation in hospital affairs | 0.25 (<0.001)             | 0.25 (<0.001)         | 0.23 (<0.001)            | 0.06 (<0.001)                    |
| Ward leadership                          | 0.25 (<0.001)             | 0.25 (<0.001)         | 0.23 (<0.001)            | 0.04 (<0.001)                    |
| Nurse-patient ratio                      | 0.17 (<0.001)             | 0.17 (<0.001)         | 0.29 (<0.001)            | 0.05 (0.013)                     |
| Physician-patient ratio                  | 0.24 (<0.001)             | 0.15 (0.006)          | 0.29 (0.002)             | -0.21 (0.607)                    |
| Central hospital                         | -1.74 (0.045)             | -2.92 (<0.001)        | -0.69 (0.582)            | -2.98 (<0.001)                   |
| Regional hospital                        | 3.92 (<0.001)             | 2.33 (<0.001)         | 4.43 (<0.001)            | -0.28 (0.498)                    |
| Mean occupancy                           | -0.18 (<0.001)            | -0.17 (<0.001)        | -0.16 (<0.001)           | -0.16 (<0.001)                   |
| Index for patient mix                    | 0.17 (<0.001)             | 0.13 (<0.001)         | 0.13 (0.005)             | 0.02 (0.393)                     |
| Mean nurse experience                    | 0.39 (0.005)              | -0.44 (<0.001)        | -0.67 (0.001)            | 0.34 (<0.001)                    |
| Hospital size                            | -0.09 (0.419)             | -0.09 (<0.001)        | -0.11 (<0.001)           | -0.04 (<0.001)                   |
| Medical specialty (vs surgical)          | 1.26 (0.037)              | 0.24 (0.642)          | -4.46 (<0.001)           | -0.14 (0.719)                    |

Figure 2. Items included in factors identified by principal axis factoring

|                                         |                                                                                                                                                                                                                                                                                                                                                                                                                                                                                                              |
|-----------------------------------------|--------------------------------------------------------------------------------------------------------------------------------------------------------------------------------------------------------------------------------------------------------------------------------------------------------------------------------------------------------------------------------------------------------------------------------------------------------------------------------------------------------------|
| Education and career possibilities      | <p>Career development/clinical ladder opportunity</p> <p>A supervisory staff that is supportive of the nurses</p> <p>Active staff development or continuing education programs for nurses</p> <p>Opportunities for advancement</p>                                                                                                                                                                                                                                                                           |
| Nurse participation in hospital affairs | <p>Opportunity for staff nurses to participate in policy decisions</p> <p>A chief nursing officer who is highly visible and accessible to staff</p> <p>A chief nursing officer equal in power and authority to other top-level hospital executives</p> <p>Staff nurses are involved in the internal governance of the hospital (e.g., practice and policy committees)</p> <p>Staff nurses have the opportunity to serve on hospital and nursing committees</p>                                               |
| Quality system                          | <p>A clear philosophy of nursing that pervades the patient care environment</p> <p>Working with nurses who are clinically competent</p> <p>An active quality assurance program</p> <p>A preceptor program for newly hired RNs</p> <p>Nursing care is based on a nursing, rather than a medical, model</p> <p>Written, up-to-date nursing care plans for all patients</p> <p>Patient care assignments that foster continuity of care, i.e., the same nurse cares for the patient from one day to the next</p> |
| Ward leadership                         | <p>A nurse manager who is a good manager and leader</p> <p>Praise and recognition for a job well done</p> <p>A nurse manager who backs up the nursing staff in decision making, even if the conflict is with a physician</p> <p>Administration that listens and responds to employee concerns</p>                                                                                                                                                                                                            |
| Staff adequacy                          | <p>Enough time and opportunity to discuss patient care problems with other nurses</p> <p>Enough registered nurses to provide quality patient care</p> <p>Enough staff to get the work done</p>                                                                                                                                                                                                                                                                                                               |
| Nurse physician relation                | <p>Physicians and nurses have good working relationships</p> <p>A lot of team work between nurses and physicians</p> <p>Collaboration (joint practice) between nurses and physicians</p> <p>Physicians value nurses' observations and judgments</p> <p>Physicians recognize nurses' contributions to patient care</p> <p>Physicians respect nurses as professionals</p> <p>Physicians hold nurses in high esteem</p>                                                                                         |

Dear editor

Dear reviewers

Oslo 20/10/12

We are most grateful for the profound and useful comments from the reviewers of the manuscript “AN OBSERVATIONAL STUDY TO IDENTIFY ORGANIZATIONAL PROCESSES ASSOCIATED WITH NURSE-REPORTED QUALITY AND PATIENT SAFETY”.

We believe the reviewer comments have contributed to a considerable improvement of the manuscript. The revised version has undergone major changes and we have responded to the comments through rewriting large parts of the manuscript.

We have systematized the reviewer comments in a table and hope to upload this file to facilitate the reading during the resubmission process. In case this is not possible, our responses is also found below as plain text.

We hope you find the changes interesting and relevant, and look forward to hear from you.

Best regards Christine Tvedt

On behalf of all authors.

Reviewer Diane Doran

| Rev No | Recommendations                                                                                                                                                                                                                                                                                                                                                                                                                                                  | My specifications                                                     | Status                            |
|--------|------------------------------------------------------------------------------------------------------------------------------------------------------------------------------------------------------------------------------------------------------------------------------------------------------------------------------------------------------------------------------------------------------------------------------------------------------------------|-----------------------------------------------------------------------|-----------------------------------|
| D1     | More information needs to be provided about the accuracy of data obtained from public registers. How reliable are the data about structural characteristics of hospitals and was any attempt made to validate the data? Some of the variables are not adequately explained such as nurse patient ratio and physician-patient ratio. Was this an average across all types of programs, both inpatient and outpatient? What specifically is index for patient mix? | a) Comment on reliability and validity of data from public registers. | Commented in discussion (page 20) |
|        |                                                                                                                                                                                                                                                                                                                                                                                                                                                                  | b) Explain nurse and physician to patient ratios i metode             | Specified in methods page 11      |
|        |                                                                                                                                                                                                                                                                                                                                                                                                                                                                  | c) Explain index for patient mix i metode                             | Specified in methods page 12      |

|    |                                                                                                                                                                                                                                                           |                                                                            |                                                                                                                               |
|----|-----------------------------------------------------------------------------------------------------------------------------------------------------------------------------------------------------------------------------------------------------------|----------------------------------------------------------------------------|-------------------------------------------------------------------------------------------------------------------------------|
| D2 | It would also be helpful to have data on the representativeness of the nurse sample to the general population of nurses in Norway in order to inform the external validity of the study. The average age seems young compared to what I am familiar with. | a) Comment on nurse sample to general population of nurses, especially age | Commented in methods page 14 and discussion page 19                                                                           |
| D4 | The investigators aggregated data on organizational process measures to the hospital level. They should report the intra-class correlation coefficient. None of the tables have sample size reported.                                                     |                                                                            | Sample size is included in tables, and organisational process measures are analysed at individual level. See page 15, table 3 |
| D5 | Are we to infer there were no missing cases for any variables or were missing values imputed? It would be helpful to clearly identify which variables in table 3 represent the Lake set of variables and which are from the current study.                | a) Missing                                                                 | Methods page 10                                                                                                               |
|    |                                                                                                                                                                                                                                                           | b) Lakes subscales                                                         | See online-figure number 2                                                                                                    |

Reviewer: Greta G. Cummings

| Revision number | Recommendations                                                                                                                                                                                                                                                                                                                                                                                                                                                                                                          | My specifications                                            | Status                |
|-----------------|--------------------------------------------------------------------------------------------------------------------------------------------------------------------------------------------------------------------------------------------------------------------------------------------------------------------------------------------------------------------------------------------------------------------------------------------------------------------------------------------------------------------------|--------------------------------------------------------------|-----------------------|
| C1              | Abstract – the objectives section is not written as objectives. It should be revised to more clearly identify the purpose of the study and the specific objectives.                                                                                                                                                                                                                                                                                                                                                      | Rewrite abstract                                             | See abstract page 2   |
| C2              | Additional detail about sample size etc should be added to the methods.                                                                                                                                                                                                                                                                                                                                                                                                                                                  | Rewrite abstract                                             | See abstract page 2   |
| C3              | The conclusions are not clear and grammatical issues throughout may it difficult to understand exactly what the authors are intending. For example, "... there is a considerable potential to address organizational design to improve of nurses' assessments of patient safety" does not tell the reader if the authors are recommending that organisational designs could or should be changed (and how this would be done), and whether nurses' "ability to assess patient safety" or their actual assessment scores? | Rewrite abstract                                             | See abstract page 2   |
| C4              | Manuscript - the confusion about the actual purpose and objectives is evident here as well. The purpose type statement indicates that the authors study "how nurses assess organizational features and relate them to patient safety and quality of nursing". This is somewhat different than the abstract, and does not delineate what aspects of nursing (care, outcomes?, performance?).                                                                                                                              | a) Introduction: specify objectives and purpose of the study | See objectives page 6 |

|    |                                                                                                                                                                                                                                                                                                                                                                                                                                                                                                                                                                                                                            |                                                                                                                                                                                                                |                                                              |
|----|----------------------------------------------------------------------------------------------------------------------------------------------------------------------------------------------------------------------------------------------------------------------------------------------------------------------------------------------------------------------------------------------------------------------------------------------------------------------------------------------------------------------------------------------------------------------------------------------------------------------------|----------------------------------------------------------------------------------------------------------------------------------------------------------------------------------------------------------------|--------------------------------------------------------------|
| C5 | Literature – the literature review is very cursory and should be expanded to address more of the current safety literature including that which discusses the relationships between organizational characteristics, nurse reported outcomes and patient safety. The literature on patient safety cultures is also considerable and should be summarized as it relates to the researcher’s operationalization of patient safety.                                                                                                                                                                                            | a) Introduction: expanded to address more of the current safety literature including that which discusses the relationships between organizational characteristics, nurse reported outcomes and patient safety | We have rewritten the introduction page 4 to respond to this |
|    |                                                                                                                                                                                                                                                                                                                                                                                                                                                                                                                                                                                                                            | b) The literature on patient safety cultures is also considerable and should be summarized as it relates to the researcher’s operationalization of patient safety                                              | We have rewritten the introduction page 4 to respond to this |
| C6 | Donabedian’s SPO framework is discussed in the literature review; however, the Structure, Process and Outcomes dimensions should be described in more detail and related to the concepts and measures of interest in this study. It is not clear if and how this model was used to guide the study design. Given the cross-sectional survey design, this analysis is limited by potential common method bias. It is important to identify potential relationships to be examined through the development of a priori hypotheses or research questions, and the efforts to mitigate common methods bias should be reported. | a) the Structure, Process and Outcomes dimensions should be described in more detail and related to the concepts and measures of interest in this study                                                        | We have rewritten the introduction page 4 to respond to this |
|    |                                                                                                                                                                                                                                                                                                                                                                                                                                                                                                                                                                                                                            | b) It is not clear if and how this model was used to guide the study design.                                                                                                                                   | We have rewritten the introduction page 4 to respond to this |
|    |                                                                                                                                                                                                                                                                                                                                                                                                                                                                                                                                                                                                                            | c) efforts to mitigate common methods bias should be reported. I diskusjon?                                                                                                                                    | Commented in discussion page 19                              |
| C7 | Methods – The data collection procedures could be expanded somewhat. For example, it is not clear why Dillman-type methods were not used to send reminders.                                                                                                                                                                                                                                                                                                                                                                                                                                                                | a) hvorfor ikke påminnelser                                                                                                                                                                                    | Commented in methods page 7                                  |

|     |                                                                                                                                                                                                                                                                                                                                                                                                                                                                                                                                                                        |                 |                                                                                                                              |
|-----|------------------------------------------------------------------------------------------------------------------------------------------------------------------------------------------------------------------------------------------------------------------------------------------------------------------------------------------------------------------------------------------------------------------------------------------------------------------------------------------------------------------------------------------------------------------------|-----------------|------------------------------------------------------------------------------------------------------------------------------|
| C8  | Measures – the rationale for using single items should be justified. Additionally the source of all measures must be reported along with reliability and validity information. The PES-NWI is not referenced (Lake et al). Despite reports of use, there is controversy about its use as measure of the nursing work environment (See Cummings et al, 2006 Nursing Research). If items were recoded, it should be noted (the NWI data are usually collected using a 4 point Likert scale of Strongly Agree=1 to strongly disagree =4, therefore requiring recoding.    | a) Single items | Commented in methods page 8. Reference to PES-NWI is corrected. We beleive comments are responded to by rewriting methods    |
| C9  | Page 7 - What is the meaning of a composite score for the adverse events listed in Figure 1? Scale means? Added as a count variable?                                                                                                                                                                                                                                                                                                                                                                                                                                   |                 | See methods page 9                                                                                                           |
| C10 | Page 8 – how were the PES-NWI subscales and HSOPSC defined as organizational process measures – this needs to be justified. Similarly, the “theoretical considerations” related to the organizational structures measures need to be explained.                                                                                                                                                                                                                                                                                                                        |                 | We beleive comments are responded to by rewriting introduction, objectives and methods                                       |
| C11 | The statistical analyses should also be justified. It is not clear why factor analysis was chosen. Given the number of hospitals and nurses in this study, the analyses could potentially be strengthened by testing hypotheses using a multilevel model. This would require aggregation of data to the care unit level. It would require ICC assessment however the literature has shown that culture and other organizational characteristics are unit or facility level characteristics and therefore should not be analyzed unadjusted across multiple facilities. |                 | We have included hospital ward amd hospital in the model. See Statistical analysis and results                               |
| C12 | Results –The relationships may be influenced by many other factors and without an analysis that controls for these, the relationships reported in the results are not as meaningful as if they based on a priori hypotheses as indicated earlier.                                                                                                                                                                                                                                                                                                                      |                 | We have specified statistical methods and results to respond to these issues. The general rewriting should make this clearer |
| C13 | Discussion – a considerable portion of the discussion repeats the results. The discussion would have to be reformulated once the rest of the manuscript has been revised.                                                                                                                                                                                                                                                                                                                                                                                              |                 | Major changes in the discussion have been made as a consequence of the revisions of other parts of the manuscript            |



**AN OBSERVATIONAL STUDY TO IDENTIFY  
ORGANIZATIONAL PROCESSES ASSOCIATED WITH NURSE-  
REPORTED QUALITY AND PATIENT SAFETY**

|                                 |                                                                                                                                                                                                                                                                                                                                                                                                                                                               |
|---------------------------------|---------------------------------------------------------------------------------------------------------------------------------------------------------------------------------------------------------------------------------------------------------------------------------------------------------------------------------------------------------------------------------------------------------------------------------------------------------------|
| Journal:                        | <i>BMJ Open</i>                                                                                                                                                                                                                                                                                                                                                                                                                                               |
| Manuscript ID:                  | bmjopen-2012-001967.R2                                                                                                                                                                                                                                                                                                                                                                                                                                        |
| Article Type:                   | Research                                                                                                                                                                                                                                                                                                                                                                                                                                                      |
| Date Submitted by the Author:   | 16-Nov-2012                                                                                                                                                                                                                                                                                                                                                                                                                                                   |
| Complete List of Authors:       | Tvedt, Christine; Norwegian Knowledge Centre for the Health Services, Department of Quality Measurement and Patient Safety; University of Oslo, Institute of Health and Society<br>Sjetne, Ingeborg; Norwegian Knowledge Centre for the Health Services Helgeland, Jon; The Norwegian Knowledge Centre for the Health Services, Department of Quality Measurement and Patient Safety<br>Bukholm, Geir; Østfold Hospital Trust, Centre for Laboratory Medicine |
| <b>Primary Subject Heading</b>: | Health services research                                                                                                                                                                                                                                                                                                                                                                                                                                      |
| Secondary Subject Heading:      | Nursing                                                                                                                                                                                                                                                                                                                                                                                                                                                       |
| Keywords:                       | Organisation of health services < HEALTH SERVICES ADMINISTRATION & MANAGEMENT, Quality in health care < HEALTH SERVICES ADMINISTRATION & MANAGEMENT, Health & safety < HEALTH SERVICES ADMINISTRATION & MANAGEMENT                                                                                                                                                                                                                                            |
|                                 |                                                                                                                                                                                                                                                                                                                                                                                                                                                               |

SCHOLARONE™  
Manuscripts

only



**Title:**

**AN OBSERVATIONAL STUDY TO IDENTIFY ORGANIZATIONAL PROCESSES  
ASSOCIATED WITH NURSE-REPORTED QUALITY AND PATIENT SAFETY**

**Corresponding author:**

Name: Christine Tvedt

Postal address: Department of Quality Measurement and Patient Safety, The Norwegian

Knowledge Centre for the Health Services, Oslo, Norway

Institute of Health and Society, University of Oslo, Oslo, Norway

PO Box 7004 St. Olavs plass

N-0130 Oslo, Norway

E-mail: cht@nokc.no

Telephone: +47 97 71 55 45

Fax: +47 23 25 50 10

**Co-authors:**

Ingeborg Strømseng Sjetne, Department of Quality Measurement and Patient Safety, The  
Norwegian Knowledge Centre for the Health Services, Oslo, Norway.

Jon Helgeland, Department of Quality Measurement and Patient Safety, The Norwegian  
Knowledge Centre for the Health Services, Oslo, Norway.

Geir Bukholm, Centre for Laboratory Medicine, Østfold Hospital Trust, Fredrikstad, Norway  
Institute of Health and Society, University of Oslo, Oslo, Norway

**Key-words:**

Patient safety, performance measures, nurses, survey, quality measurement.

**Word count:** 3797

1  
2  
3 ABSTRACT  
4  
5  
6

7 **Objectives:** The purpose of this study was to identify organisational processes and structures  
8 that are associated with nurse-reported patient safety and quality of nursing. **Design:** This is  
9 an observational cross-sectional study using survey methods.  
10  
11

12  
13  
14 **Setting:** Respondents from 31 Norwegian hospitals with more than 85 beds were included in  
15 the survey.  
16

17  
18 **Participants:** All registered nurses working in direct patient care in a position of 20 % or  
19 more were invited to answer the survey. In this study 3618 nurses from surgical and medical  
20 wards responded (response rate 58.9). Nurses practice environment was defined as  
21 organisational processes and measured by the *Nursing Work Index Revised* and items from  
22 *Hospital Survey on Patient Safety Culture*.  
23  
24  
25  
26  
27  
28

29  
30 **Outcome measures:** Nurses' assessments of patient safety, quality of nursing, confidence in  
31 how their patients manage after discharge and frequency of adverse events were used as  
32 outcome measures.  
33  
34  
35

36 **Results** *Quality system, nurse-physician relation, patient safety management and staff*  
37 *adequacy* were process measures associated with nurse-reported work- and patient- related  
38 outcomes, but we found no associations with *nurse participation, education and career* and  
39 *ward leadership*. Most organisational structures were non-significant in the multilevel model  
40 except for nurses' affiliations to *medical department* and *hospital type*.  
41  
42  
43  
44  
45  
46

47 **Conclusion** Organisational structures may have minor impact on how nurses perceive work-  
48 and patient related outcomes, but the findings in this study indicate that there is a considerable  
49 potential to address organizational design in improvement of patient safety and quality of  
50 care.  
51  
52  
53  
54  
55  
56  
57  
58  
59  
60

### Article focus

- Identifying organizational processes and structures associated to nurse-reported quality and patient safety in hospitals.
- Increase knowledge about organizational design promoting patient safety among nurses as a micro system of hospitals.

### Key messages

- Addressing organisational design may have a considerable potential to improve patient safety and quality of care.

### Strengths and limitations

- A considerable number of nurses have given their responses on a multicenter nurse survey providing a valuable data material.
- Several aspects of the survey method may have influenced the results of this study.

## AN OBSERVATIONAL STUDY TO IDENTIFY ORGANIZATIONAL PROCESSES ASSOCIATED WITH NURSE-REPORTED QUALITY AND PATIENT SAFETY

### Introduction

1  
2  
3 The report “Crossing the quality chasm” from the Institute of medicine in 2001 called for a  
4 system change to improve safety in the health care services<sup>1</sup>. The report led to establishment  
5 of patient safety programmes and health care reforms in many Western countries. The  
6  
7 introduction of evidence-based practice, guidelines, performance measurements, and feedback  
8  
9 has characterized patient safety initiatives in hospitals during the last decade. Results from  
10  
11 evaluations of the interventional efforts are inconsistent, and several authors have described a  
12  
13 need to better understand how organizational features contribute to quality and patient safety  
14  
15 in hospitals<sup>2-4</sup>. The organizational climate is defined by the employees’ perceptions of these  
16  
17 features, and might be understood as structural properties of the organisation and employees’  
18  
19 perceptions of their organisational environment<sup>5</sup>. Both organizational structures (e.g. hospital  
20  
21 size, hospital volume) and organisational processes (e.g. patient safety climate, perception of  
22  
23 work environment) have been associated with safety outcomes<sup>4-6</sup>.

24  
25  
26  
27  
28  
29  
30 The system perspective is based on how input to the health care system is managed and how  
31  
32 this input benefits the patients and society<sup>1</sup>. Donabedian’s model for quality serve as a  
33  
34 framework to understand how hospital structures and processes contribute to health care  
35  
36 outcomes and the model is modified by Battle et al to illustrate how processes exist within the  
37  
38 structure of the healthcare system<sup>7-9</sup>. Battles describes how adjustments of organisational  
39  
40 structures and processes may contribute to a reduction of failures that cause adverse events.  
41  
42 An organisational climate where processes and structures allow patient safety improvements  
43  
44 is required to minimize the failures of care<sup>3,9</sup>. Inertia of organizational change observed in  
45  
46 health care institutions is suggested as one explanation for why the “progress of patient safety  
47  
48 improvements has been slow”<sup>3</sup>. A leadership with clear visions and strategies is a key to  
49  
50 transformational change towards a patient safe organization, and knowledge about how health  
51  
52 care workers assess their work environment and patient safety in their work place should  
53  
54 therefore be essential to these leaders<sup>10</sup>.

1  
2  
3  
4  
5 The growing body of evidence on how work environment is associated with healthcare  
6  
7 performance support this view. In studies of physicians' work environment associations with  
8  
9 the quality of health service delivery have been presented and improvement of nurses' work  
10  
11 environment is suggested as a cost effective strategy to improve patient outcomes<sup>11-15</sup>.  
12  
13  
14 Several studies have presented associations between nurses' work environment and patient  
15  
16 outcomes like adverse events, risk-adjusted mortality and patient satisfaction<sup>15-21</sup>. These are  
17  
18 important studies identifying associations between patient outcome and features of the health  
19  
20 care organisation. However, the way health care workers perceive and report patient safety  
21  
22 serve as essential information to investigate how processes and structures support patient safe  
23  
24 health care organisations<sup>9,22,23</sup>.  
25  
26  
27  
28

29  
30 A few studies emphasize the differences in how professions perceive patient safety, and it may  
31  
32 be useful to understand the attitudes and perceptions towards patient safety within  
33  
34 professions<sup>22,24-27</sup>. The planning and implementation of strategies and interventions to  
35  
36 improve patient safety may also take such variations into account. Despite the fact that nurse-  
37  
38 reported quality of care have been associated with failure to rescue, patient satisfaction and  
39  
40 processes of care, a small number of studies has explored how nurse-reported patient safety is  
41  
42 associated with work environment<sup>28 29 30-33</sup>.  
43  
44  
45  
46

## 47 **Objectives**

48  
49 Nurses constitute a large proportion of health care workers, and how they perceive an  
50  
51 organizational design promoting patient safety is essential information about nurses as a  
52  
53 microsystem<sup>4,8,34</sup>. The purpose of this study was to identify organisational process measures in  
54  
55 nurses' work environment and hospital characteristics (organisational structure measures) that  
56  
57  
58  
59  
60

1  
2  
3 were associated with nurse-reported patient safety and quality of nursing. In particular, we  
4  
5 were interested in which process measures remained after adjusting for organisational  
6  
7 structure measures.  
8  
9

## 10 11 **Methods**

### 12 13 **Design**

14  
15  
16  
17 The theoretical approach of this observational cross sectional study was based on  
18  
19 Donabedian's dimensions of a quality model: structure, process and outcome. We modified  
20  
21 Battles' version of this model to illustrate how we defined the placement of hospital  
22  
23 characteristics, nurses' work environment and nurse-reported quality of nursing and patient  
24  
25 safety (figure 1). The readers should bear in mind that these variables only represent part of a  
26  
27 complex reality.  
28  
29

30  
31  
32 Figure 1 Modification of Battles' model to illustrate the understanding of structure, process  
33  
34 and outcome in this context<sup>7</sup>.  
35  
36

### 37 38 **Data collection**

39  
40 This study involved a survey among nurses in surgical and medical wards in 35 Norwegian  
41  
42 hospitals with more than 85 beds. The data collection was part of the European RN4Cast  
43  
44 study<sup>11</sup>. A paper questionnaire, information letter, and return envelope were distributed  
45  
46 through the nurses' union representatives to 6600 nurses during the autumn of 2009.  
47

48  
49 Registered nurses working in direct patient care in a position of 20% or more were included,  
50  
51 and nurses on long-term leaves were excluded. Nurses received the questionnaire at their  
52  
53 workplaces, and the distribution procedures included collection of information about nurses'  
54  
55 affiliations to hospital, department and ward. Personal reminders were not distributed as the  
56  
57  
58  
59  
60

1  
2  
3 respondents' names and addresses were not available to the researchers. In some hospital  
4  
5 wards the union representatives and/or nurse leaders gave collective reminders. The method  
6  
7 of data collection and handling was approved by the Data Protection Official for Research.  
8  
9

#### 10 11 Nurse-reported outcome measures

12  
13 The use of self-reported outcomes in this study was necessary to describe how nurses  
14  
15 perceived quality of nursing and patient safety at their work places. Single-item overall  
16  
17 assessment of quality of nursing and patient safety were used as outcome variables as  
18  
19 practiced in other studies investigating nurse-reported quality and patient safety<sup>30-33,35</sup>. We  
20  
21 defined four items as variables that describe how nurses report work performance; “work-  
22  
23 related measures”, and how nurses describe patient outcomes, “patient-related measures”:  
24  
25  
26  
27

#### 28 Work-related outcome measures

- 29  
30  
31 • Quality of Nursing: In general, how would you describe the quality of nursing care  
32  
33 delivered to patients on your unit/ward? (four-point Likert-type scale where 1=poor,  
34  
35 2=fair, 3=good, and 5=excellent, meaning that high scores indicate better quality)  
36  
37
- 38 • Patient Safety: Please give your department an overall grade on patient safety. (5-point  
39  
40 Likert-type scale where 1=failing, 2=poor, 3=acceptable, 4=very good, and  
41  
42 5=excellent, meaning that high scores indicate better Patient Safety).  
43  
44  
45

#### 46 Patient-related outcome measures

- 47  
48  
49 • Self-Care Ability: How confident are you that your patients are able to manage their  
50  
51 care when discharged? (four-point Likert-type scale where 1=not at all confident,  
52  
53 2=somewhat confident, 3=confident, and 4=very confident, meaning that high scores  
54  
55 indicate more confidence in how patients manage).  
56  
57  
58  
59  
60

- 1  
2  
3  
4  
5  
6  
7  
8  
9  
10  
11  
12  
13  
14  
15  
16  
17  
18  
19  
20  
21  
22  
23  
24  
25  
26  
27  
28  
29  
30  
31  
32  
33  
34  
35  
36  
37  
38  
39  
40  
41  
42  
43  
44  
45  
46  
47  
48  
49  
50  
51  
52  
53  
54  
55  
56  
57  
58  
59  
60
- Low Frequent AE (Adverse Events): Nurses were also asked to estimate how frequently adverse events have happened to their patients on a seven-point Likert-type scale (1=never, 2=some times per year, 3=once a month or less, 4=some times per month, 5=once a week, 6=some times per week, 7= every day). We recoded the subscale into the opposite direction so that the lowest frequency (Low frequency AE = preferably) made the highest scores.

Different types of adverse events were subjects of the question and in this study we calculated the mean of the seven adverse events scores per nurse:

- Pressure ulcers after admission
- Patients received wrong medication, time or dose
- Patient falls with injury
- Urinary tract infections
- Bloodstream infections
- Complaints from patients or their families
- Pneumonia

#### Organizational process measures

Nurses' work environment was measured by the instrument *Nursing Work Index* (NWI)<sup>36</sup> and a subscale including items from *The Hospital Survey on Patient Safety Culture* (HSOPSC)<sup>37</sup>.

These variables were regarded as organizational processes and made the following variables:

- *Education and career*
- *Nurse participation*
- *Quality system*
- *Ward leadership*
- *Staff adequacy*
- *Nurse physician relation*
- *Patient safety management*



1  
2  
3 The Norwegian version of NWI was translated and tested according to acknowledged  
4 procedures for questionnaire modifications between cultures<sup>38</sup>. We performed an exploratory  
5 factor analysis to identify the factor structure of the Norwegian dataset. The subscales  
6 identified were used as explanatory variables in the study.  
7  
8  
9  
10

11  
12  
13  
14 The items were four-point Likert-type scales, and high scores indicated agreement that the  
15 features were present in the job situation (1=strongly disagree, 2=somewhat disagree,  
16 3=somewhat agree, and 4=strongly agree). The scale scores were calculated as the single  
17 items' average for all respondents who had valid scores on at least half of the items included  
18 in the scale in question.  
19  
20  
21  
22  
23  
24

25  
26  
27 Leadership is essential for development of organisational/patient safety culture<sup>37,39,40</sup>. Three  
28 items from the HSOPSC-questionnaire represented leadership topics such as performance  
29 feedback and actions showing that patient safety have priority in hospital management. We  
30 regarded a subscale of these items as process measure for the work environment. High scores  
31 indicated agreement that the items were present in the job situation (five-point Likert-type  
32 scale: 1=strongly disagree, 2=disagree, 3=neither, 4=agree, 5=strongly agree).  
33  
34  
35  
36  
37  
38  
39

40 Organizational structure measures  
41  
42

43 Information about the hospitals were collected from public registers, reported from hospital  
44 administrators on our request, or aggregated from the survey data<sup>41,42</sup>. The following  
45 measures were used as organizational structure variables:  
46  
47  
48

- 49 • *Nurse–patient ratio* (Number of nurse man-years per 10,000 patient days, 2009)<sup>42</sup>
- 50 • *Physician–patient ratio* (Number of physician man-years per 10,000 patient days,  
51 2009)<sup>42</sup>  
52  
53  
54  
55  
56  
57  
58  
59  
60

- 1
- 2
- 3 • *Index for patient mix* (The ratio between the number of DRG-points and the number of
- 4 admissions, 2009)<sup>41</sup>
- 5
- 6
- 7 • *Hospital size* (Number of beds, 2009)<sup>41</sup>
- 8
- 9
- 10 • *Hospital type* (made as two dummy-variables):
- 11
  - 12 ○ *Regional university hospital* (reference value: local hospital)
  - 13
  - 14 ○ *Local university hospital* (reference value: local hospital)
  - 15
- 16 • *Bed occupancy* (mean bed occupancy in percent for 2009, hospital reported)
- 17
- 18 • *Medical department* (from the nurse survey: Nurses' affiliation to medical department
- 19 with reference value: surgical department)
- 20
- 21
- 22
- 23 • *Nurse experience* (in years per hospital derived from survey data)
- 24
- 25
- 26
- 27

28 “*Regional university hospitals*” were defined as university hospitals with national  
29 responsibilities, while “*local university hospitals*” were defined as university hospitals  
30 without national responsibilities. All other hospitals were defined as “local hospitals”. We  
31 collected organisational structure measures to ensure validity and comparability for all  
32 hospitals included in the survey. The measures selected for this study was chosen after  
33 considerations of literature discussing the context of patient safety research and practices. To  
34 describe and classify patient safety practices and research hospital type and size, patient  
35 clinical complexity, and professional staffing are suggested as essential structural  
36 features<sup>4,6,43,44 45</sup>.

## 51 **Statistical analysis**

52  
53 All analyses were made using SPSS version 15.0.  
54  
55  
56  
57  
58  
59  
60

1  
2  
3 We used exploratory factor analysis to examine the structure of NWI in the Norwegian  
4 dataset, including nurses working in intensive care units, medical and surgical wards  
5 (n=5490). We performed reliability tests to assess internal consistency for the NWI and for  
6 the subscale from HSOPSC.  
7  
8  
9

10  
11  
12 The questionnaire was distributed to 6147 nurses in medical and surgical wards, and 3618  
13 responded (mean response rate: 58.9%). Based on recommendations for cut points for  
14 response rates we included 31 hospitals with a survey response rate above 40%<sup>46</sup>. Nurses from  
15 intensive care units were excluded because the number of these units, the size, and the type of  
16 patients admitted vary between hospitals.  
17  
18  
19

20  
21 The values of all variables' were transformed into a 0–100 scale, 0 representing the lowest  
22 possible score and 100 the highest possible score. Organizational structure variables were  
23 transformed into variables relative to *hospital type* to control for the assumption of  
24 dependency with *hospital type* (in the following marked with “R” in variable names). The  
25 transformation was made by subtracting the mean values of *hospital type* for each case. The  
26 unit of observation was individuals. Descriptive statistics of organizational structure measures  
27 were made at hospital-aggregated level.  
28  
29  
30  
31  
32  
33  
34  
35  
36  
37  
38  
39

40  
41  
42 Initially bivariate regression analysis for each organisational variable and each nurse-reported  
43 outcome was performed. In the stepwise multivariate regression that followed, all  
44 organisational variables and all potential interactions were included. Main effects and  
45 interactions that remained significant on a 0.05 level were included in the final multivariate  
46 multilevel regression introducing hospital ward and hospital as level 2 and 3 variables.  
47  
48 Interactions between *hospital type* and other structural variables were removed in the final  
49 model because they were related to features of single hospitals.  
50  
51  
52  
53  
54  
55  
56  
57  
58  
59  
60

## Results

The exploratory factor analysis identified six subscales from NWI, and internal consistency (Cronbach's alpha) ranged from 0.68 to 0.88 in the reliability test (see table 1). A comparison of the subscales we identified and the subscales from PES-NWI<sup>36</sup> is presented in figure 2. Internal consistency (Cronbach's alpha) of the three items from HSOPSC was 0.72.

Table 1 Internal consistency (Cronbach's alpha) of subscales

| Subscales                                   | Number of items | Internal consistency (Cronbach's alpha) |
|---------------------------------------------|-----------------|-----------------------------------------|
| <i>Staff adequacy</i>                       | 3               | 0.80                                    |
| <i>Nurse physician relation</i>             | 7               | 0.88                                    |
| <i>Ward leadership</i>                      | 4               | 0.78                                    |
| <i>Nurse participation</i>                  | 5               | 0.68                                    |
| <i>Education and career (possibilities)</i> | 4               | 0.73                                    |
| <i>Quality system</i>                       | 7               | 0.71                                    |
| <i>Patient safety management</i>            | 3               | 0.72                                    |

The structural characteristics of hospitals are described in table 2. Most of the hospitals were categorized as local (23), but three hospitals were *local university hospitals* and another five were *regional university hospitals*.

Table2: Characteristics of the included hospitals (N=31)

| Hospital characteristics                                          | Median | Min.–max.   |
|-------------------------------------------------------------------|--------|-------------|
| <i>Hospital size</i> <sup>1)</sup>                                | 414    | 85–958      |
| <i>Index for patient mix</i> <sup>2)</sup>                        | 8.0    | 6.9–11.3    |
| <i>Physician–patient ratio</i> <sup>3)</sup>                      | 20.5   | 9.6–38.8    |
| <i>Nurse–patient ratio</i> <sup>4)</sup>                          | 53.3   | 29.9–82.9   |
| <i>Nurse experience (no. of years per hospital)</i> <sup>5)</sup> | 8.6    | 4.1–13.3    |
| <i>Bed occupancy</i> <sup>6)</sup>                                | 87.3   | 75.2 –102.7 |

1) Number of beds 2) The ratio between the number of DRG-points and the number of admissions 3) Number of physician-years per 10,000 patient days 4) Number of nurse-years per 10,000 patient days 5) Mean years of experience among the respondents per hospital 6) Percent, bed occupancy for 2009

About 90 % of Norwegian nurses are members of The Norwegian Nurses Organisation

(NNO). Mean age among the members of NNO are 43.0., and 90 % are female. The mean age of nurse respondents (N=3618) in this study was 35.6 (median 33.0, range 21–71), and their mean experience as nurses was 8.4 (median 5.0, range 0–45). Most nurses were female (93.8%). All registered nurses in Norway hold a Bachelor's degree, and 15.3% of the respondents had further education. The distribution of nurses between *hospital types* was 13.6% for *local university hospital* and 29.2% for *regional university hospital*. The distribution between departments was about even, with 56.4% of nurses working in medical departments.

Organizational process variables are presented in table 3. *Nurse participation* and *staff adequacy* had the lowest scores, while *nurse-physician relation* and *ward leadership* had high scores.

Table 3 Nurses' assessment of organizational process measures (N=3618)

| Hospital characteristics         | N    | Median | Min.–max. | SD   |
|----------------------------------|------|--------|-----------|------|
| <i>Patient safety management</i> | 3556 | 58.3   | 0-100     | 18.7 |
| <i>Staff adequacy</i>            | 3602 | 44.4   | 0-100     | 22.4 |
| <i>Nurse-physician relation</i>  | 3602 | 66.67  | 0-100     | 15.9 |
| <i>Education and career</i>      | 3603 | 50.0   | 0-100     | 20.5 |
| <i>Quality system</i>            | 3594 | 52.4   | 0-100     | 15.8 |
| <i>Nurse participation</i>       | 3641 | 40.0   | 0-100     | 17.6 |
| <i>Ward leadership</i>           | 3612 | 66.67  | 0-100     | 20.6 |

Bivariate linear regression showed that, with a few exceptions, organizational structure and process measures were associated with nurses' reports of Quality of Nursing, Patient Safety, Self-Care Ability, and Low frequency AE (see table 4, online only). The final multivariate multilevel model introducing hospital ward and hospital as level 2 and 3 variables, showed that almost all variance was found on individual level, and demonstrated that correlation among observations within the hospitals was lower than for hospital wards (table 5). The correlation at hospital level accounted for 0.22 % – 0.74 % of the total variance, and

1  
2  
3 correlation at hospital ward level accounted for 2.46 % – 8.64 % of the total variance (table  
4  
5).  
6  
7  
8  
9  
10  
11  
12  
13  
14  
15  
16  
17  
18  
19  
20  
21  
22  
23  
24  
25  
26  
27  
28  
29  
30  
31  
32  
33  
34  
35  
36  
37  
38  
39

40 Table 5 Multivariate multilevel regression analysis of process/structure measures and nurses'  
41 self-reported work- and patient-related outcomes (N=3618)  
42  
43

|                         |                                  | Work-related outcomes |                       | Patient-related outcomes |                       |
|-------------------------|----------------------------------|-----------------------|-----------------------|--------------------------|-----------------------|
|                         |                                  | Quality of Nursing    | Patient Safety        | Self-Care Ability        | Low frequencyAE       |
|                         |                                  | Coefficient (p-value) | Coefficient (p-value) | Coefficient (p-value)    | Coefficient (p-value) |
| <b>Process measures</b> | <i>Patient safety management</i> | 0.09 (<0.001)         | 0.19 (<0.001)         | 0.13 (<0.001)            | 0.06 (<0.001)         |
|                         | <i>Staff adequacy</i>            | 0.12 (<0.001)         | 0.12 (<0.001)         | 0.10 (<0.001)            | 0.04 (<0.001)         |
|                         | <i>Nurse-physician relation</i>  | 0.06 (0.003)          | 0.07 (<0.001)         | 0.08(0.006)              |                       |
|                         | <i>Education and career</i>      |                       |                       |                          |                       |
|                         | <i>Quality system</i>            | 0.25 (<0.001)         | 0.18 (<0.001)         | 0.21 (<0.001)            | 0.09 (<0.001)         |

|                         |                                                           |                                                         |               |                |               |
|-------------------------|-----------------------------------------------------------|---------------------------------------------------------|---------------|----------------|---------------|
|                         | <i>Nurse participation</i>                                | -0.04 (0.028)                                           |               |                |               |
|                         | <i>Ward leadership</i>                                    | 0.05 (0.011)                                            |               |                | -0.03 (0.008) |
| Structure measures      | <i>Local university hospital</i>                          |                                                         |               |                | -3.08 (0.008) |
|                         | <i>Regional university hospital</i>                       | 3.57 (0.003)                                            | 1.89 (0.024)  | 1.48 (<0.375)  |               |
|                         | <i>Nurse-patient ratio-R</i>                              |                                                         |               | 0.21 (0.127)   |               |
|                         | <i>Physician-patient ratio-R</i>                          |                                                         |               | -0.28 (0.290)  |               |
|                         | <i>Bed occupancy-R</i>                                    |                                                         | 0.00 (0.955)  | -0.25 (0.055)  | -0.09 (0.127) |
|                         | <i>Index for patient mix-R</i>                            | 0.01 (0.861)                                            |               | 0.10 (0.415)   |               |
|                         | <i>Nurse experience-R</i>                                 |                                                         |               | -0.77(0.071)   | 0.33 (0.051)  |
|                         | <i>Hospital size-R</i>                                    |                                                         |               | -0.02 (0.533)  |               |
|                         | <i>Medical department</i>                                 | 0.23 (0.769)                                            | -1.12 (0.039) | -5.89 (<0.001) |               |
|                         |                                                           | <i>Index for patient mix-R *<br/>Medical department</i> | 0.14 (0.114)  |                | -0.28 (0.032) |
| Interactions            | <i>Nurse-patient ratio-R *<br/>nurse experience-R</i>     |                                                         |               | 0.16 (0.013)   |               |
|                         | <i>Physician-patient ratio-R *<br/>nurse experience-R</i> |                                                         |               | -0.28 (0.066)  |               |
|                         | <i>Bed occupancy-R * Medical<br/>department</i>           |                                                         | -0.10 (0.227) |                |               |
| Intra class correlation | ICC(percent)/design effect (hospital ward level)          | 5.68/1.69                                               | 2.46/1.30     | 5.35/1.65      | 8.64/2.05     |
|                         | ICC(percent)/design effect (hospital level)               | 0.56/1.47                                               | 0.72/1.61     | 0.22/1.19      | 0.74/1.62     |

Intraclass correlation coefficients and design effects for each outcome are presented in table 5.

The multivariate multilevel model showed that nurses' reports of work-related outcome measures; Quality of Nursing, and Patient Safety, were associated with four of the organizational process measures; *patient safety management*, *staff adequacy*, *nurse-physician relation*, and *quality system* (table 5). Small but significant coefficients were found for associations between Quality of Nursing and *nurse participation* (negatively) and *ward leadership* (positively). Working at a *regional university hospital* rather than at a local hospital was associated with both work-related outcome measures. Nurses affiliated to *medical departments* gave lower ratings of Patient Safety than nurses working in surgical departments.

1  
2  
3 The patient-related outcome measures; Self-Care Ability, and Low frequency AE, were  
4 associated with the organizational process measures *patient safety management, staff*  
5 *adequacy, and quality system*. Self-Care Ability was associated with *Nurse-physician relation*  
6 (positively), and Low frequency AE was associated with *ward leadership* (negatively). Nurses  
7 working in a *medical department* reported poorer Self-Care Ability. Nurses working a *local*  
8 *university hospital* rather than a local hospital reported higher frequency of adverse events  
9 (reduced Low frequency AE). The interactions included in the final model showed that *index*  
10 *for patient mix* reduced the negative effect of *medical department* on Self-Care Ability. High  
11 *nurse experience* per hospital increased the effect of *nurse-patient ratio* on Self-Care Ability.  
12 Except for *medical department* none of the main effects involved in the interactions were  
13 significant.  
14  
15  
16  
17  
18  
19  
20  
21  
22  
23  
24  
25  
26

## 27 28 **Discussion**

### 29 30 31 Main findings

32  
33  
34 Organisational process variables; *quality system, patient safety management, staff adequacy*  
35 *and nurse-physician relation* were associated with nurse-reported work- and patient- related  
36 outcomes. Not all process variables were associated with the outcomes. The organisational  
37 structure variables *medical department* and *hospital type* were associated with some of the  
38 nurse-reported outcomes.  
39  
40  
41  
42  
43  
44  
45  
46

### 47 48 Strengths and limitations

49  
50 This study is based on data from one of the largest nurse surveys performed in Norway, and  
51 includes almost all Norwegian hospitals with more than 85 beds. Norwegian nurses give their  
52 workplaces better ratings of work environment and patient safety, and nurse-patient ratios are  
53  
54  
55  
56  
57  
58  
59  
60



1  
2  
3 high compared to other countries<sup>11</sup>. The good performance of Norwegian hospitals as  
4  
5 assessed by nurses makes it of particular interest to study the organisational design.  
6  
7

8 Questions related to cross-sectional survey design are often addressed towards the inadequacy  
9  
10 to prove causality. However, the intention of our study was not to add evidence of this kind,  
11  
12 but to describe associations between nurses' perceptions of work environment and their  
13  
14 assessments of patient safety and quality of nursing. We have not made statistical controls to  
15  
16 mitigate the risk of common method bias as the value of this is questioned<sup>47-51</sup>. The method  
17  
18 for identifying the five-factor structure of nursing work index has been criticised, but is one of  
19  
20 several ways to identify factor structure<sup>52</sup>. Internal consistency has been tested for both scales,  
21  
22 and was higher for the six-factor structure identified in the Norwegian data and provided a  
23  
24 nuanced description of work environment and is likely better adapted to a Norwegian context  
25  
26  
27  
28<sup>36 38</sup>. The questionnaires were distributed through the nurses' union representatives, and we  
29  
30 have not been able to control whether loyalty to NNO has influenced the results. The age  
31  
32 distribution of our sample is corresponding with studies from similar populations in Norway,  
33  
34  
35<sup>53</sup>. The difference in age from nurses in the NNO memberregister may be explained by  
36  
37 exclusion of nurses in leader positions and part-time positions. Nurses' practice environments  
38  
39 are complex and cannot be fully covered by a questionnaire, but overall the nursing work  
40  
41 index is characterised as a "promising instrument"<sup>52,54</sup>. However, NWI is developed to  
42  
43 evaluate nurse-reported job outcomes, and the applicability of the instrument to patient safety  
44  
45 might be uncertain<sup>55</sup>. Statistics Norway and The Norwegian Directorate of Health are well-  
46  
47 established registers with complete coverage. The high quality of their data collection has  
48  
49 minimized the risk of inaccuracy of organisational structure variables and ensured the  
50  
51 comparability between hospitals.  
52  
53

54  
55  
56 Organisational process measures  
57  
58  
59  
60

1  
2  
3 Educational level has been associated with risk-adjusted patient mortality and failure to rescue  
4 within 30 days of admission<sup>56,57</sup>. Even though all Norwegian nurses hold a bachelor degree,  
5 we expected that *education and career* was associated with some of the outcome measures,  
6 but this was not the case. However, the association between *quality system*, involving issues  
7 as training for newly hired and continuity of nursing, and work- and patient- related outcomes  
8 indicate that integrated training programmes may be more important for patient safety and  
9 quality of nursing<sup>57</sup>. The subscale *quality system* also represents continuous processes such as  
10 presence of quality control programmes, systems for documentation, and nursing versus  
11 medical orientation. These findings are supported in studies showing that quality programmes  
12 influence health care workers attitudes and increase improvement events<sup>58-61</sup>. The existence of  
13 standards, infrastructure and quality systems contribute to expectations and predictability for  
14 the health professionals and maximize their efforts to avoid patient harm<sup>1,9,62</sup>.

15  
16 In our study *Ward leadership* was inconsistently associated with the outcomes in this study.  
17 However, a positive association with *patient safety management* supports findings from  
18 studies that emphasise nurse leadership and a management that prioritizes patient safety<sup>10,40</sup>  
19<sup>63,64</sup>. In a recent study the authors found that engaged leadership strengthened both  
20 communication and teamwork and that these qualities of the organisation enhanced patient  
21 safety<sup>65</sup>. Communication and collegial discussions are important aspects to streamline  
22 workflow and procedures to ensure patient safety, and serve as sources for professional  
23 development<sup>66,67</sup>. The association between good nurse-physician relation and high quality of  
24 care from other studies was supported in our findings<sup>68-71</sup>. The channels for communicating  
25 results from performance measurements and other patient safety messages require  
26 engagement from leaders on all levels, and should probably be customized to preferences of  
27 the targeted health care profession.

1  
2  
3 *Staff adequacy* represent nurses' assessments of the possibility to get the work done, provide  
4  
5 quality of care, and discuss problems related to care with colleagues. Processes that ensure  
6  
7 adequate and targeted resource allocation may contribute to reduced length of stay, increase in  
8  
9 ambulatory activity, as well as ensuring right competence at the right place and time<sup>72 73</sup>.  
10  
11 Associations between staff ratios and patient outcomes such as failure to rescue, unplanned  
12  
13 extubation, cardiac arrest, nosocomial infections, and risk-adjusted mortality have been found  
14  
15 in several studies, indicating that staff levels are related to quality and patient safety<sup>15,19,21,74-</sup>  
16  
17 <sup>77</sup>. Corresponding results have been shown in studies with nurse-reported outcome measures,  
18  
19 but was not confirmed by our study<sup>75-77</sup>. A possible reason for this is that nurse-patient ratios  
20  
21 are high in Norway and that Norwegian nurses perceive work environment better than nurses  
22  
23 in other countries<sup>11</sup>. This may indicate that passing a threshold for staff levels, challenges  
24  
25 related to quality, and patient safety could be met on an organizational level<sup>11,23,78</sup>.  
26  
27  
28  
29  
30  
31  
32

### 33 Organisational structure measures

34  
35  
36 Few organizational structure measures were significantly associated with outcome variables  
37  
38 when hospital and hospital ward was introduced as levels in the analysis. Hence, when  
39  
40 affiliation to regional university hospitals remained significant, it may as well be explained by  
41  
42 a strong common perception of the hospital performance as of *hospital type*. *Regional*  
43  
44 *university hospital* was not associated with nurse-reported patient-related outcomes implying  
45  
46 that nurses' perception of quality and safety may be good despite the risk for complications  
47  
48 among patients in these hospitals. Associations between hospital type and patient safety  
49  
50 indicators are inconsistently reported by other authors that suggest that features other than  
51  
52 hospital type are more important for patient outcomes<sup>6,79,80</sup>.  
53  
54  
55  
56  
57  
58  
59  
60

1  
2  
3 The negative association between Low frequency AE and *local university hospital* might  
4 confirm the assumption that common perception is a more decisive factor than hospital type.  
5  
6 However, because of the small number of hospitals in this group, conditions in a single  
7  
8 hospital might have influenced the results. Correlation on hospital and hospital ward levels  
9  
10 were highest for Low frequency AE, indicating a stronger correlation for this outcome on  
11  
12 these levels, and we cannot rule out that our findings are related to resources, patients'  
13  
14 severity and nurses' perceptions of risk of complications<sup>6</sup>. We found that nurses working in  
15  
16 *medical departments* gave poorer ratings of patients' self care ability and that *medical*  
17  
18 *department* interacted with *index for patient mix*. We lack information about patients' severity  
19  
20 and DRG-weights on departmental level, but the complexity in diseases and comorbidity  
21  
22 among elderly patients' may explain this result if the majority of them are admitted to medical  
23  
24 departments. These consideration do not explain why being affiliated to a *medical department*  
25  
26 was associated with nurse-reported Patient safety, but may indicate that patient safety  
27  
28 interventions are easier to apply and make visible in surgical departments as the procedures  
29  
30 are more standardized<sup>81</sup>.  
31  
32  
33  
34  
35  
36

### 37 Final remarks

38  
39  
40 The agreement of respondents within organisational levels (ICCs) was in accordance with  
41  
42 similar studies reviewed by Park and Lake<sup>82</sup>. The culture of a group is formed by shared  
43  
44 perceptions, thoughts and emotions, and the dependency of the observations at ward level  
45  
46 may be explained by such phenomena<sup>39</sup>.  
47  
48

49  
50 Organizational structure variables included in our study have minor impact on how nurses  
51  
52 perceive work- and patient-related outcomes. However, the organizational process variables  
53  
54 consistently related to all outcomes measures indicated that there is a considerable potential in  
55  
56 addressing organizational design in improvement of patient safety and quality of care. This  
57  
58  
59  
60

1  
2  
3 study makes a contribution to knowledge about how interventions should be targeted towards  
4  
5 organisational processes in patient safety work. Further research should also address  
6  
7 organisational processes relevant for other professions.  
8  
9

10  
11 **Ethical approvals:** The method of data collection and handling was approved by the Data  
12  
13 Protection Official for Research.  
14

15  
16 **Acknowledgements:** The authors would like to thank all Norwegian nurses that responded  
17  
18 on the nurse survey.  
19

20  
21 **Competing interests:** None.  
22

23  
24 **Funding:** Data were collected by Norwegian Nurses' Organisation and Norwegian  
25  
26 Knowledge Centre for the Health Services in collaboration. Christine Tvedt was supported by  
27  
28 a grant from Norwegian Nurses' organisation.  
29

30  
31 **Data sharing statement:** The data set is available at The Norwegian Knowledge Centre for  
32  
33 the Health Services, and requests should be addressed by emailing [cht@nokc.no](mailto:cht@nokc.no).  
34  
35  
36  
37  
38  
39

#### 40 Reference List

- 41  
42  
43  
44 1 Committee on Quality of Health Care in America. Crossing the quality chasm : a new health  
45 system for the 21st century. Washington, D.C.: National Academy Press; 2001.  
46  
47 2 Wong Jiahui, Beglaryan Hasmik. Strategies for Hospitals to Improve Patient Safety: A Review of  
48 the Research. 2004. The Change Foundation.  
49 Ref Type: Report  
50  
51 3 Leape L, Berwick D, Clancy C et al. Transforming healthcare: a safety imperative. *Qual Saf*  
52 *Health Care* 2009; 18(6):424-428.  
53  
54 4 Hearld LR, Alexander JA, Fraser I et al. Review: how do hospital organizational structure and  
55 processes affect quality of care?: a critical review of research methods. *Med Care Res Rev*  
56 2008; 65(3):259-299.  
57  
58  
59  
60

- 5 Zohar D. Thirty years of safety climate research: reflections and future directions. *Accid Anal Prev* 2010; 42(5):1517-1522.
- 6 Rivard PE, Elixhauser A, Christiansen CL et al. Testing the association between patient safety indicators and hospital structural characteristics in VA and nonfederal hospitals. *Med Care Res Rev* 2010; 67(3):321-341.
- 7 Battles JB, Lilford RJ. Organizing patient safety research to identify risks and hazards. *Qual Saf Health Care* 2003; 12 Suppl 2:ii2-ii7.
- 8 Donabedian A. An introduction to quality assurance in health care. New York: Oxford University Press; 2003.
- 9 Battles JB. Quality and safety by design. *Qual Saf Health Care* 2006; 15 Suppl 1:i1-i3.
- 10 Cummings G. The call for leadership to influence patient outcomes. *Nurs Leadersh (Tor Ont)* 2011; 24(2):22-25.
- 11 Aiken LH, Sermeus W, Van den Heede K et al. Patient safety, satisfaction, and quality of hospital care: cross sectional surveys of nurses and patients in 12 countries in Europe and the United States. *BMJ* 2012; 344:e1717.
- 12 Wallace JE, Lemaire JB, Ghali WA. Physician wellness: a missing quality indicator. *Lancet* 2009; 374(9702):1714-1721.
- 13 Hickam DH, Severance S, Feldstein A et al. The effect of health care working conditions on patient safety. *Evid Rep Technol Assess (Summ)* 2003;(74):1-3.
- 14 Grol R. Changing physicians' competence and performance: finding the balance between the individual and the organization. *J Contin Educ Health Prof* 2002; 22(4):244-251.
- 15 Stone PW, Mooney-Kane C, Larson EL et al. Nurse Working Conditions and Patient Safety Outcomes. *Med Care* 2007; 45(6):571-578.
- 16 Cummings GG, Midodzi WK, Wong CA et al. The contribution of hospital nursing leadership styles to 30-day patient mortality. *Nurs Res* 2010; 59(5):331-339.
- 17 Aiken LH, Clarke SP, Sloane DM et al. Effects of hospital care environment on patient mortality and nurse outcomes. *J Nurs Adm* 2008; 39(7-8 Suppl):S45-S51.
- 18 Estabrooks CA, Midodzi WK, Cummings GG et al. The impact of hospital nursing characteristics on 30-day mortality. *Nurs Res* 2005; 54(2):74-84.
- 19 Needleman J, Buerhaus P, Pankratz VS et al. Nurse staffing and inpatient hospital mortality. *N Engl J Med* 2011; 364(11):1037-1045.
- 20 Blegen MA, Goode CJ, Reed L. Nurse staffing and patient outcomes. *Nurs Res* 1998; 47(1):43-50.
- 21 Kane RL, Shamliyan TA, Mueller C et al. The Association of Registered Nurse Staffing Levels and Patient Outcomes: Systematic Review and Meta-Analysis. *Med Care* 2007; 45(12):1195-1204.

- 1
- 2
- 3 22 Singer SJ, Gaba DM, Falwell A et al. Patient safety climate in 92 US hospitals: differences by
- 4 work area and discipline. *Med Care* 2009; 47(1):23-31.
- 5
- 6 23 Carayon P, Schoofs HA, Karsh BT et al. Work system design for patient safety: the SEIPS model.
- 7 *Qual Saf Health Care* 2006; 15 Suppl 1:i50-i58.
- 8
- 9 24 Westbrook MT, Braithwaite J, Travaglia JF et al. Promoting safety: longer-term responses of
- 10 three health professional groups to a safety improvement programme. *Int J Health Care Qual*
- 11 *Assur* 2007; 20(7):555-571.
- 12
- 13 25 Listyowardojo TA, Nap RE, Johnson A. Variations in hospital worker perceptions of safety
- 14 culture. *Int J Qual Health Care* 2012; 24(1):9-15.
- 15
- 16 26 Gallego B, Westbrook MT, Dunn AG et al. Investigating patient safety culture across a health
- 17 system: multilevel modelling of differences associated with service types and staff
- 18 demographics. *Int J Qual Health Care* 2012.
- 19
- 20 27 Travaglia JF, Westbrook MT, Braithwaite J. Implementation of a patient safety incident
- 21 management system as viewed by doctors, nurses and allied health professionals. *Health*
- 22 *(London)* 2009; 13(3):277-296.
- 23
- 24 28 McHugh MD, Stimpfel AW. Nurse reported quality of care: A measure of hospital quality. *Res*
- 25 *Nurs Health* 2012.
- 26
- 27 29 Shang J, Friese CR, Wu E et al. Nursing Practice Environment and Outcomes for Oncology
- 28 Nursing. *Cancer Nurs* 2012.
- 29
- 30 30 Van BP, Clarke S, Roelant E et al. Impacts of unit-level nurse practice environment and burnout
- 31 on nurse-reported outcomes: a multilevel modelling approach. *J Clin Nurs* 2010; 19(11-
- 32 12):1664-1674.
- 33
- 34 31 Ausserhofer D, Schubert M, Engberg S et al. Nurse-reported patient safety climate in Swiss
- 35 hospitals: a descriptive-explorative substudy of the Swiss RN4CAST study. *Swiss Med Wkly*
- 36 2012; 142:0.
- 37
- 38 32 Aiken LH, Clarke SP, Sloane DM et al. Nurses' reports on hospital care in five countries. *Health*
- 39 *Aff (Millwood )* 2001; 20(3):43-53.
- 40
- 41 33 Aiken LH, Clarke SP, Sloane DM. Hospital staffing, organization, and quality of care: cross-
- 42 national findings. *Int J Qual Health Care* 2002; 14(1):5-13.
- 43
- 44 34 Braithwaite J, Westbrook MT, Robinson M et al. Improving patient safety: the comparative
- 45 views of patient-safety specialists, workforce staff and managers. *BMJ Qual Saf* 2011;
- 46 20(5):424-431.
- 47
- 48 35 Warren CR, Landis RS. One is the loneliest number: A meta-analytic investigation on single-item
- 49 measure fidelity . *Ergometrika* 2007; 4(1):32-35.
- 50
- 51 36 Lake ET. Development of the practice environment scale of the Nursing Work Index. *Res Nurs*
- 52 *Health* 2002; 25(3):176-188.
- 53
- 54 37 Blegen MA, Gearhart S, O'Brien R et al. AHRQ's hospital survey on patient safety culture:
- 55 psychometric analyses. *J Patient Saf* 2009; 5(3):139-144.
- 56
- 57
- 58
- 59
- 60



- 1  
2  
3 38 Sjetne IS, Tvedt C, Squires A. Måleinstrumentet "The Nursing Work Index-Revised" -  
4 oversettelse og utprøving av en norsk versjon. ["The Nursing Work Index-Revised" -Instrument  
5 translation and assessment of a Norwegian version]. *Sykepleien Forskning* 2011; 6(4):358-365.  
6  
7 39 Schein EH. Organizational culture and leadership. San Francisco: Jossey-Bass; 2004.  
8  
9 40 Wong CA, Cummings GG. The relationship between nursing leadership and patient outcomes: a  
10 systematic review. *J Nurs Manag* 2007; 15(5):508-521.  
11  
12 41 Huseby, B (red). Specialist health care services 2009 (SAMDATA). 2010. Oslo, The Norwegian  
13 Directorate of Health. 978.  
14 Ref Type: Report  
15  
16 42 Statistics Norway. Statbank. 2012 Available from:  
17 URL:<http://statbank.ssb.no/statistikkbanken/>  
18  
19 43 West E. Management matters: the link between hospital organisation and quality of patient  
20 care. *Qual Health Care* 2001; 10(1):40-48.  
21  
22 44 Taylor SL, Dy S, Foy R et al. What context features might be important determinants of the  
23 effectiveness of patient safety practice interventions? *BMJ Qual Saf* 2011; 20(7):611-617.  
24  
25 45 Dy SM, Taylor SL, Carr LH et al. A framework for classifying patient safety practices: results  
26 from an expert consensus process. *BMJ Qual Saf* 2011; 20(7):618-624.  
27  
28 46 Kramer M, Schmalenberg C, Brewer BB et al. Accurate assessment of clinical nurses' work  
29 environments: response rate needed. *Res Nurs Health* 2009; 32(2):229-240.  
30  
31 47 Spector PE, Brannick MT. Common Method Issues: An Introduction to the Feature Topic in  
32 Organizational Research Methods. *Organizational Research Methods* 2010; 13(3):403-406.  
33  
34 48 Conway JM, Lance CE. What Reviewers Should Expect from Authors Regarding Common  
35 Method Bias in Organizational Research. *Journal of Business and Psychology (J Bus Psychol)*  
36 2010; 25:325-334.  
37  
38 49 Brannick MT, Chan D, Conway JM et al. What is Method Variance and How Can We Cope With  
39 It? A Panel Discussion. *Organizational Research Methods* 2010; 13(3):407-420.  
40  
41 50 Lance CE, Dawson P, Birkelbach D et al. Method Effects, Measurement Error, and Substantive  
42 Conclusions. *Organizational Research Methods* 2011; 13(3):435-455.  
43  
44 51 Siemsen E, Roth A, Oliveira P. Common Method Bias in Regression Models With Linear,  
45 Quadratic, and Interaction Effects. *Organizational Research Methods* 2010; 13(3):456-476.  
46  
47 52 Cummings GG, Hayduk L, Estabrooks CA. Is the Nursing Work Index Measuring Up?: Moving  
48 Beyond Estimating Reliability to Testing Validity. *Nurs Res* 2006; 55(2):82-93.  
49  
50 53 Sjetne IS, Veenstra M, Ellefsen B et al. Service quality in hospital wards with different nursing  
51 organization: nurses' ratings. *J Adv Nurs* 2009; 65(2):325-336.  
52  
53 54 Bonnetterre V, Liaudy S, Chatellier G et al. Reliability, validity, and health issues arising from  
54 questionnaires used to measure Psychosocial and Organizational Work Factors (POWFs) among  
55 hospital nurses: a critical review. *J Nurs Meas* 2008; 16(3):207-230.  
56  
57  
58  
59  
60



- 1  
2  
3 55 Zohar D. Safety climate in industrial organizations: theoretical and applied implications. *J Appl Psychol* 1980; 65(1):96-102.  
4  
5  
6 56 Aiken LH, Clarke SP, Cheung RB et al. Educational levels of hospital nurses and surgical patient mortality. *JAMA* 2003; 290(12):1617-1623.  
7  
8  
9 57 McAlearney AS, Garman AN, Song PH et al. High-performance work systems in health care management, part 2: qualitative evidence from five case studies. *Health Care Manage Rev* 2011; 36(3):214-226.  
10  
11  
12  
13 58 Haley RW, Quade D, Freeman HE et al. The SENIC Project. Study on the efficacy of nosocomial infection control (SENIC Project). Summary of study design. *Am J Epidemiol* 1980; 111(5):472-485.  
14  
15  
16  
17 59 Naveh E, Stem Z. How quality improvement programs can affect general hospital performance. *Int J Health Care Qual Assur Inc Leadersh Health Serv* 2005; 18(4-5):249-270.  
18  
19  
20  
21 60 Maguerez G, Erbault M, Terra JL et al. Evaluation of 60 continuous quality improvement projects in French hospitals. *Int J Qual Health Care* 2001; 13(2):89-97.  
22  
23  
24 61 Tvedt C, Bukholm G. Healthcare workers' self-reported effect of an interventional programme on knowledge and behaviour related to infection control. *Qual Saf Health Care* 2010; 19(6):e7.  
25  
26  
27 62 Kohn, L.T, Corrigan JM, Donaldson MSE. To err is human : building a safer health system. Washington, D.C.: National Academy Press; 2000.  
28  
29  
30 63 Goeschel CA, Wachter RM, Pronovost PJ. Responsibility for quality improvement and patient safety: hospital board and medical staff leadership challenges. *Chest* 2010; 138(1):171-178.  
31  
32  
33 64 Conway J. Getting boards on board: engaging governing boards in quality and safety. *Jt Comm J Qual Patient Saf* 2008; 34(4):214-220.  
34  
35  
36 65 Castner J, Foltz-Ramos K, Schwartz DG et al. A Leadership Challenge: Staff Nurse Perceptions After an Organizational TeamSTEPPS Initiative. *J Nurs Adm* 2012; 42(10):467-472.  
37  
38  
39 66 Quick J. Modern perioperative teamwork: an opportunity for interprofessional learning. *J Perioper Pract* 2011; 21(11):387-390.  
40  
41  
42 67 West P, Sculli G, Fore A et al. Improving Patient Safety and Optimizing Nursing Teamwork Using Crew Resource Management Techniques. *J Nurs Adm* 2012; 42(1):15-20.  
43  
44  
45 68 Manser T. Teamwork and patient safety in dynamic domains of healthcare: a review of the literature. *Acta Anaesthesiol Scand* 2009; 53(2):143-151.  
46  
47  
48 69 Auerbach AD, Sehgal NL, Blegen MA et al. Effects of a multicentre teamwork and communication programme on patient outcomes: results from the Triad for Optimal Patient Safety (TOPS) project. *BMJ Qual Saf* 2011.  
49  
50  
51 70 Baker DP, Day R, Salas E. Teamwork as an essential component of high-reliability organizations. *Health Serv Res* 2006; 41(4 Pt 2):1576-1598.  
52  
53  
54 71 Schmalenberg C, Kramer M. Nurse-physician relationships in hospitals: 20,000 nurses tell their story. *Crit Care Nurse* 2009; 29(1):74-83.  
55  
56  
57  
58  
59  
60

- 1  
2  
3 72 Christianson MK, Sutcliffe KM, Miller MA et al. Becoming a high reliability organization. *Crit Care* 2011; 15(6):314.  
4  
5  
6 73 Allen D, Rixson L. How has the impact of 'care pathway technologies' on service integration in  
7 stroke care been measured and what is the strength of the evidence to support their  
8 effectiveness in this respect? *Int J Evid Based Healthc* 2008; 6(1):78-110.  
9  
10 74 Pronovost P, Needham D, Berenholtz S et al. An intervention to decrease catheter-related  
11 bloodstream infections in the ICU. *N Engl J Med* 2006; 355(26):2725-2732.  
12  
13 75 Tervo-Heikkinen T, Kiviniemi V, Partanen P et al. Nurse staffing levels and nursing outcomes: a  
14 Bayesian analysis of Finnish-registered nurse survey data. *J Nurs Manag* 2009; 17(8):986-993.  
15  
16 76 Djukic M, Kovner CT, Brewer CS et al. Work environment factors other than staffing associated  
17 with nurses' ratings of patient care quality. *Health Care Manage Rev* 2011.  
18  
19 77 Gunnarsdottir S, Clarke SP, Rafferty AM et al. Front-line management, staffing and nurse-  
20 doctor relationships as predictors of nurse and patient outcomes. A survey of Icelandic hospital  
21 nurses. *Int J Nurs Stud* 2007.  
22  
23 78 Shekelle PG, Pronovost PJ, Wachter RM et al. Advancing the science of patient safety. *Ann*  
24 *Intern Med* 2011; 154(10):693-696.  
25  
26 79 Thornlow DK, Stukenborg GJ. The association between hospital characteristics and rates of  
27 preventable complications and adverse events. *Med Care* 2006; 44(3):265-269.  
28  
29 80 Sjetne IS, Veenstra M, Stavem K. The effect of hospital size and teaching status on patient  
30 experiences with hospital care: a multilevel analysis. *Med Care* 2007; 45(3):252-258.  
31  
32 81 El-Jardali F, Dimassi H, Jamal D et al. Predictors and outcomes of patient safety culture in  
33 hospitals. *BMC Health Serv Res* 2011; 11:45.  
34  
35 82 Park S, Lake ET. Multilevel modeling of a clustered continuous outcome: nurses' work hours  
36 and burnout. *Nurs Res* 2005; 54(6):406-413.  
37  
38  
39  
40  
41  
42  
43  
44  
45  
46  
47  
48  
49  
50  
51  
52  
53  
54  
55  
56  
57  
58  
59  
60

**Title:**

**AN OBSERVATIONAL STUDY TO IDENTIFY ORGANIZATIONAL PROCESSES  
ASSOCIATED WITH NURSE-REPORTED QUALITY AND PATIENT SAFETY**

**Corresponding author:**

Name: Christine Tvedt

Postal address: Department of Quality Measurement and Patient Safety, The Norwegian

Knowledge Centre for the Health Services, Oslo, Norway

Institute of Health and Society, University of Oslo, Oslo, Norway

PO Box 7004 St. Olavs plass

N-0130 Oslo, Norway

E-mail: cht@nokc.no

Telephone: +47 97 71 55 45

Fax: +47 23 25 50 10

**Co-authors:**

Ingeborg Strømseng Sjetne, Department of Quality Measurement and Patient Safety, The  
Norwegian Knowledge Centre for the Health Services, Oslo, Norway.

Jon Helgeland, Department of Quality Measurement and Patient Safety, The Norwegian  
Knowledge Centre for the Health Services, Oslo, Norway.

Geir Bukholm, Centre for Laboratory Medicine, Østfold Hospital Trust, Fredrikstad, Norway  
Institute of Health and Society, University of Oslo, Oslo, Norway

**Key-words:**

Patient safety, performance measures, nurses, survey, quality measurement.

**Word count:** 379788

1  
2  
3 ABSTRACT  
4  
5  
6

7 **Objectives:** The purpose of this study was to identify organisational processes and structures  
8 that are associated with nurse-reported patient safety and quality of nursing. ~~Health care~~  
9 ~~workers' perceptions related to patient safety vary by disciplines within the health care~~  
10 ~~organisations, and organizational design promoting patient safety among nurses as a micro~~  
11 ~~system of hospitals is studied~~

12  
13  
14  
15  
16  
17  
18 **Design:** This is an observational cross-sectional study using survey methods.

19  
20  
21 **Setting:** Respondents from 31 Norwegian hospitals with more than 85 beds were included in  
22 the survey.

23  
24  
25 **Participants:** All registered nurses working in direct patient care in a position of 20 % or  
26 more were invited to answer the survey. In this study 3618 nurses from surgical and medical  
27 wards responded (response rate 58.9). Nurses practice environment was defined as  
28 organisational processes and measured by the *Nursing Work Index Revised* and items from  
29 *Hospital Survey on Patient Safety Culture*.

30  
31  
32  
33  
34  
35  
36 **Outcome measures:** Nurses' assessments of patient safety, quality of nursing, confidence in  
37 how their patients manage after discharge and frequency of adverse events were used as  
38 outcome measures.

39  
40  
41  
42 **Results** *Quality system, nurse-physician relation, patient safety management* and *staff*  
43 *adequacy* were process measures associated with nurse-reported work- and patient- related  
44 outcomes, but we found no associations with *nurse participation, education and career* and  
45 *ward leadership*. Most organisational structures were non-significant in the multilevel model  
46 except for nurses' affiliations to *medical department* and *hospital type*.

47  
48  
49  
50  
51  
52  
53  
54 **Conclusion** Organisational structures may have minor impact on how nurses perceive work-  
55 and patient related outcomes, but the findings in this study indicate that there is a considerable

1  
2  
3 potential to address organizational design in improvement of patient safety and quality of  
4  
5 care.  
6  
7  
8

9  
10 **Article focus**

- 11  
12  
13
  - Identifying organizational processes and structures associated to nurse-reported quality  
14 and patient safety in hospitals.
  - Increase knowledge about organizational design promoting patient safety among  
15 nurses as a micro system of hospitals.

16  
17  
18  
19  
20  
21

22 **Key messages**

- 23  
24  
25
  - Addressing organisational design ~~Organizational processes~~ may have a considerable  
26 potential ~~to address organizational design into~~ improvement of patient safety and  
27 quality of care.

28  
29  
30  
31  
32

33 **Strengths and limitations**

- 34  
35  
36
  - A considerable number of nurses have given their responses on a multicenter nurse  
37 survey providing a valuable data material.
  - Several aspects of the survey method may have influenced the results of this study.

38  
39  
40  
41  
42  
43  
44  
45  
46  
47  
48  
49  
50  
51  
52  
53  
54  
55  
56  
57  
58  
59  
60

## AN OBSERVATIONAL STUDY TO IDENTIFY ORGANIZATIONAL PROCESSES ASSOCIATED WITH NURSE-REPORTED QUALITY AND PATIENT SAFETY

### Introduction

The report “Crossing the quality chasm” from the Institute of medicine in 2001 called for a system change to improve safety in the health care services<sup>1</sup>. The report led to establishment of patient safety programmes and health care reforms in many Western countries. The introduction of evidence-based practice, guidelines, performance measurements, and feedback has characterized patient safety initiatives in hospitals during the last decade. Results from evaluations of the interventional efforts are inconsistent, and several authors have described a need to better understand how organizational features contribute to quality and patient safety in hospitals<sup>2-4</sup>. The organizational climate is defined by the employees’ perceptions of these features, and might be understood as structural properties of the organisation and employees’ perceptions of their organisational environment<sup>5</sup>. Both organizational structures (e.g. hospital size, hospital volume) and organisational processes (e.g. patient safety climate, perception of work environment) have been associated with safety outcomes<sup>4-6</sup>.

The system perspective is based on how input to the health care system is managed and how this input benefits the patients and society<sup>1</sup>. Donabedian’s model for quality serve as a framework to understand how hospital structures and processes contribute to health care outcomes and the model is modified by Battle et al to illustrate how processes exist within the structure of the healthcare system<sup>7-9</sup>. Battles describes how adjustments of organisational structures and processes may contribute to a reduction of failures that cause adverse events. An organisational climate where processes and structures allow patient safety improvements is required to minimize the failures of care<sup>3,9</sup>. Inertia of organizational change observed in health care institutions is suggested as one explanation for why the “progress of patient safety

1  
2  
3 improvements has been slow”<sup>3</sup>. A leadership with clear visions and strategies is a key to  
4  
5 transformational change towards a patient safe organization, and knowledge about how health  
6  
7 care workers assess their work environment and patient safety in their work place should  
8  
9 therefore be essential to these leaders<sup>10</sup>.

11  
12  
13  
14 The growing body of evidence on how work environment is associated with healthcare  
15  
16 performance support this view. In studies of physicians’ work environment associations with  
17  
18 the quality of health service delivery have been presented and improvement of nurses’ work  
19  
20 environment is suggested as a cost effective strategy to improve patient outcomes<sup>11-15</sup>.

21  
22 Several studies have presented associations between nurses’ work environment and patient  
23  
24 outcomes like adverse events, risk-adjusted mortality and patient satisfaction<sup>15-21</sup>. These are  
25  
26 important studies identifying associations between patient outcome and features of the health  
27  
28 care organisation. However, the way health care workers perceive and report patient safety

29  
30 serve as essential information to investigate how ~~information about how health care workers~~  
31  
32 ~~take advantage of~~ processes and structures support in the organization is essential for design  
33  
34 ~~of~~ patient safe health care organisations<sup>9,22,23</sup>.

35  
36  
37  
38  
39  
40  
41 A few studies emphasize the differences in how professions ~~Attitudes and perceptions~~  
42  
43 ~~related to~~ patient safety-, and it may be useful to understand the attitudes and perceptions  
44  
45 towards patient safety within professions vary by disciplines and micro systems<sup>22,24-27</sup>. The  
46  
47 planning and implementation of strategies and interventions to improve patient safety may  
48  
49 also should take such variations into account<sup>22,24-27</sup>. Despite the fact that nurse-reported  
50  
51 quality of care have been associated with failure to rescue, patient satisfaction and processes  
52  
53 of care, a small number of studies has explored how nurse-reported patient safety is associated  
54  
55 with work environment<sup>28 29 30-33</sup>.

## Objectives

Nurses constitute a large proportion of health care workers, and how they perceive an organizational design promoting patient safety is essential information about nurses as a microsystem<sup>4,8,34</sup>. The purpose of this study was to identify organisational process measures in nurses' work environment and hospital characteristics (organisational structure measures) that were associated with nurse-reported patient safety and quality of nursing. In particular, we were interested in which process measures remained after adjusting for organisational structure measures.

## Methods

### Design

The theoretical approach of this observational cross sectional study was based on Donabedian's dimensions of a quality model: structure, process and outcome. We modified Battles' version of this model to illustrate how we defined the placement of hospital characteristics, nurses' work environment and nurse-reported quality of nursing and patient safety ~~were nested~~ (figure 1). The readers should bear in mind that these variables only represent part of a complex reality.

Figure 1 Modification of Battles' model to illustrate the understanding of structure, process and outcome in this context<sup>7</sup>.

### Data collection

This study involved a survey among nurses in surgical and medical wards in 35 Norwegian hospitals with more than 85 beds. The data collection was part of the European RN4Cast



1  
2  
3 study<sup>11</sup>. A paper questionnaire, information letter, and return envelope were distributed  
4  
5 through the nurses' union representatives to 6600 nurses during the autumn of 2009.  
6  
7 Registered nurses working in direct patient care in a position of 20% or more were included,  
8  
9 and nurses on long-term leaves were excluded. Nurses received the questionnaire at their  
10  
11 workplaces, and the distribution procedures included collection of information about nurses'  
12  
13 affiliations to hospital, department and ward. Personal reminders were not distributed as the  
14  
15 respondents' names and addresses were not available to the researchers. In some hospital  
16  
17 wards the union representatives and/or nurse leaders gave collective reminders. The method  
18  
19 of data collection and handling was approved by the Data Protection Official for Research.  
20  
21  
22  
23  
24

#### 25 Nurse-reported outcome measures

26  
27 The use of self-reported outcomes in this study was necessary to describe how nurses  
28  
29 perceived quality of nursing and patient safety at their work places. Single-item overall  
30  
31 assessment of quality of nursing and patient safety were used as outcome variables as  
32  
33 practiced in other studies investigating nurse-reported quality and patient safety<sup>30-33,35</sup>. We  
34  
35 defined ~~the four questions-items~~ as variables that describe how nurses report work  
36  
37 performance; "work-related measures", and how nurses describe patient outcomes, "patient-  
38  
39 related measures":  
40  
41  
42

#### 43 Work-related outcome measures

- 44  
45  
46 • Quality of Nursing: In general, how would you describe the quality of nursing care  
47  
48 delivered to patients on your unit/ward? (four-point Likert-type scale where 1=poor,  
49  
50 2=fair, 3=good, and 5=excellent, meaning that high scores indicate better quality)  
51  
52
- 53  
54 • Patient Safety: Please give your department an overall grade on patient safety. (5-point  
55  
56 Likert-type scale where 1=failing, 2=poor, 3=acceptable, 4=very good, and  
57  
58 5=excellent, meaning that high scores indicate better Patient Safety).  
59  
60

### Patient-related outcome measures

- Self-Care Ability: How confident are you that your patients are able to manage their care when discharged? (four-point Likert-type scale where 1=not at all confident, 2=somewhat confident, 3=confident, and 4=very confident, meaning that high scores indicate more confidence in how patients manage).
- Low Frequent AE (Adverse Events): Nurses were also asked to estimate how frequently adverse events have happened to their patients on a seven-point Likert-type scale (1=never, 2=some times per year, 3=once a month or less, 4=some times per month, 5=once a week, 6=some times per week, 7= every day). We recoded the subscale into the opposite direction so that the lowest frequency (Low frequency AE = preferably) made the highest scores.

Different types of adverse events where subjects of the question and in this study we calculated the mean of the seven adverse events scores per nurse:

- Pressure ulcers after admission
- Patients received wrong medication, time or dose
- Patient falls with injury
- Urinary tract infections
- Bloodstream infections
- Complaints from patients or their families
- Pneumonia

### Organizational process measures

Nurses' work environment was measured by the instrument *Nursing Work Index* (NWI)<sup>36</sup> and a subscale including items from *The Hospital Survey on Patient Safety Culture* (HSOPSC)<sup>37</sup>.

1  
2  
3 These ~~subscales-variables~~ were regarded as organizational processes and made the following  
4  
5 variables:

- 6
- 7
- 8 • *Education and career*
- 9 • *Nurse participation*
- 10 • *Quality system*
- 11 • *Ward leadership*
- 12 • *Staff adequacy*
- 13 • *Nurse physician relation*
- 14 • *Patient safety management*
- 15
- 16
- 17

18  
19  
20 ~~The~~ Norwegian version of NWI ~~has-been~~was translated and tested according to  
21  
22 acknowledged procedures for questionnaire modifications between cultures<sup>38</sup>. We performed  
23  
24 an exploratory factor analysis to identify the factor structure of the Norwegian dataset. The  
25  
26 subscales identified were used as explanatory variables in the study.  
27  
28

29  
30  
31 The items were four-point Likert-type scales, and high scores indicated agreement that the  
32  
33 ~~items-features~~ were present in the job situation (1=strongly disagree, 2=somewhat disagree,  
34  
35 3=somewhat agree, and 4=strongly agree). The scale scores were calculated as the single  
36  
37 items' average for all respondents who had valid scores on at least half of the items included  
38  
39  
40 in the scale in question.  
41  
42

43  
44 Leadership is essential for development of organisational/patient safety culture, ~~and we~~  
45  
46 ~~included three items from the HSOPSC-questionnaire~~<sup>37,39,40</sup>. Three items from the HSOPSC-  
47  
48 questionnaire ~~The items-~~represented leadership topics such as performance feedback and  
49  
50 actions showing that patient safety have priority in hospital management. We regarded a  
51  
52 subscale of these items as process measure for the work environment. High scores indicated  
53  
54 agreement that the items were present in the job situation (five-point Likert-type scale:  
55  
56 1=strongly disagree, 2=disagree, 3=neither, 4=agree, 5=strongly agree).  
57  
58  
59  
60

## Organizational structure measures

Information about the hospitals were collected from public registers, reported from hospital administrations on our request, or aggregated from the survey data<sup>41,42</sup>. The following measures were used as organizational structure variables:

- *Nurse–patient ratio* (Number of nurse man-years per 10,000 patient days, 2009)<sup>42</sup>
- *Physician–patient ratio* (Number of physician man-years per 10,000 patient days, 2009)<sup>42</sup>
- *Index for patient mix* (The ratio between the number of DRG-points and the number of admissions, 2009)<sup>41</sup>
- *Hospital size* (Number of beds, 2009)<sup>41</sup>
- *Hospital type* (made as two dummy-variables):
  - *Regional university hospital* (reference value: local hospital)
  - *Local university hospital* (reference value: local hospital)
- *Bed occupancy* (mean bed occupancy in percent for 2009, hospital reported)
- *Medical department* (from the nurse survey: Nurses’ affiliation to medical department with reference value: surgical department)
- *Nurse experience* (in years per hospital derived from survey data)

“*Regional university hospitals*” were defined as university hospitals with national responsibilities, while “*local university hospitals*” were defined as university hospitals without national responsibilities. All other hospitals were defined as “local hospitals”. We collected organisational structure measures to ensure validity and comparability for all hospitals included in the survey. The measures selected for this study was chosen after considerations of literature discussing the context of patient safety research and practices. To

1  
2  
3 describe and classify patient safety practices and research hospital type and size, patient  
4  
5 clinical complexity, and professional staffing are suggested as essential structural  
6  
7 features<sup>4,6,43,44 45</sup>.

### 11 **Statistical analysis**

12  
13  
14 All analyses were made using SPSS version 15.0.

15  
16  
17 We used exploratory factor analysis to examine the structure of NWI in the Norwegian  
18  
19 dataset, including nurses working in intensive care units, medical and surgical wards  
20  
21 (n=5490). We performed reliability tests to assess internal consistency for the NWI and for  
22  
23 the subscale from HSOPSC.

24  
25  
26  
27 The questionnaire was distributed to 6147 nurses in medical and surgical wards, and 3618  
28  
29 responded (mean response rate: 58.9%). Based on recommendations for cut points for  
30  
31 response rates we included 31 hospitals with a survey response rate above 40%<sup>46</sup>. Nurses from  
32  
33 intensive care units were excluded ~~in the~~ because the number of these units, the size, and the  
34  
35 type of patients admitted vary between hospitals.-

36  
37  
38 The values of all variables' were transformed into a 0–100 scale, 0 representing the lowest  
39  
40 possible score and 100 the highest possible score. Organizational structure variables were  
41  
42 transformed into variables relative to *hospital type* to control for the assumption of  
43  
44 dependency with *hospital type* (in the following marked with “R” in variable names). The  
45  
46 transformation was made by subtracting the mean values of *hospital type* for each case. The  
47  
48 unit of observation was individuals. Descriptive statistics of organizational structure measures  
49  
50 were made at hospital-aggregated level.  
51  
52  
53  
54  
55  
56  
57  
58  
59  
60

Initially bivariate regression analysis for each organisational variable and each nurse-reported outcome was performed. In the stepwise multivariate regression that followed, all organisational variables and all potential interactions were included. Main effects and interactions that remained significant on a 0.05 level were included in the final multivariate multilevel regression introducing hospital ward and hospital as level 2 and 3 variables. Interactions between *hospital type* and other structural variables were removed in the final model because they were related to features of single hospitals.

## Results

The exploratory factor analysis identified six subscales from NWI, and internal consistency (Cronbach's alpha) ranged from 0.68 to 0.88 in the reliability test (see table 1). A comparison of the subscales we identified and the subscales from PES-NWI<sup>36</sup> is presented in figure 2. Internal consistency (Cronbach's alpha) of the three items from HSOPSC was 0.72.

Table 1 Internal consistency (Cronbach's alpha) of subscales

| Subscales                                   | Number of items | Internal consistency (Cronbach's alpha) |
|---------------------------------------------|-----------------|-----------------------------------------|
| <i>Staff adequacy</i>                       | 3               | 0.80                                    |
| <i>Nurse physician relation</i>             | 7               | 0.88                                    |
| <i>Ward leadership</i>                      | 4               | 0.78                                    |
| <i>Nurse participation</i>                  | 5               | 0.68                                    |
| <i>Education and career (possibilities)</i> | 4               | 0.73                                    |
| <i>Quality system</i>                       | 7               | 0.71                                    |
| <i>Patient safety management</i>            | 3               | 0.72                                    |

The structural characteristics of hospitals are described in table 2. Most of the hospitals were categorized as local (23), but three hospitals were *local university hospitals* and another five were *regional university hospitals*.

Table 2: Characteristics of the included hospitals (N=31)

| Hospital characteristics                                    | Median | Min.–max.   |
|-------------------------------------------------------------|--------|-------------|
| Hospital size <sup>1)</sup>                                 | 414    | 85–958      |
| Index for patient mix <sup>2)</sup>                         | 8.0    | 6.9–11.3    |
| Physician–patient ratio <sup>3)</sup>                       | 20.5   | 9.6–38.8    |
| Nurse–patient ratio <sup>4)</sup>                           | 53.3   | 29.9–82.9   |
| Nurse experience (no. of years per hospital <sup>5)</sup> ) | 8.6    | 4.1–13.3    |
| Bed occupancy <sup>6)</sup>                                 | 87.3   | 75.2 –102.7 |

1) Number of beds 2) The ratio between the number of DRG-points and the number of admissions 3) Number of physician-years per 10,000 patient days 4) Number of nurse-years per 10,000 patient days 5) Mean years of experience among the respondents per hospital 6) Percent, bed occupancy for 2009

About 90 % of Norwegian nurses are members of The Norwegian Nurses Organisation

(NNO). ~~and in~~ Mean age among the members of NNO these nurses are 43.0, and 90 % ~~were~~ are female. The mean age of nurse respondents (N=3618) in this study was 35.6 (median 33.0, range 21–71), and their mean experience as nurses was 8.4 (median 5.0, range 0–45). Most nurses were female (93.8%). All registered nurses in Norway hold a Bachelor's degree, and 15.3% of the respondents had further education. The distribution of nurses between *hospital types* was 13.6% for *local university hospital* and 29.2% for *regional university hospital*. The distribution between departments was about even, with 56.4% of nurses working in medical departments.

Organizational process variables are presented in table 3. *Nurse participation* and *staff adequacy* had the lowest scores, while *nurse-physician relation* and *ward leadership* had high scores.

Table 3 Nurses' assessment of organizational process measures (N=3618)

| Hospital characteristics  | N    | Median | Min.–max. | SD   |
|---------------------------|------|--------|-----------|------|
| Patient safety management | 3556 | 58.3   | 0-100     | 18.7 |
| Staff adequacy            | 3602 | 44.4   | 0-100     | 22.4 |
| Nurse-physician relation  | 3602 | 66.67  | 0-100     | 15.9 |
| Education and career      | 3603 | 50.0   | 0-100     | 20.5 |
| Quality system            | 3594 | 52.4   | 0-100     | 15.8 |
| Nurse participation       | 3641 | 40.0   | 0-100     | 17.6 |
| Ward leadership           | 3612 | 66.67  | 0-100     | 20.6 |

1  
2  
3  
4  
5 Bivariate linear regression showed that, with a few exceptions, organizational structure and  
6  
7 process measures were associated with nurses' reports of Quality of Nursing, Patient Safety,  
8  
9 Self-Care Ability, and Low frequency AE (see table 4, online only). The final multivariate  
10  
11 multilevel model introducing hospital ward and hospital as level 2 and 3 variables, showed  
12  
13 that almost all variance was found on individual level, and demonstrated that correlation  
14  
15 among observations within the hospitals was lower than for hospital wards (table 5). The  
16  
17 correlation at hospital level accounted for 0.22 % – 0.74 % of the total variance, and  
18  
19 correlation at hospital ward level accounted for 2.46 % – 8.64 % of the total variance (table  
20  
21  
22  
23 5).  
24  
25  
26  
27  
28  
29  
30  
31  
32  
33  
34  
35  
36  
37  
38  
39  
40  
41  
42  
43  
44  
45  
46  
47  
48  
49  
50  
51  
52  
53  
54  
55  
56  
57  
58  
59  
60



Table 5 Multivariate multilevel regression analysis of process/structure measures and nurses' self-reported work- and patient-related outcomes (N=3618)

|                                                  | Work-related outcomes                                 |                       | Patient-related outcomes |                       |               |
|--------------------------------------------------|-------------------------------------------------------|-----------------------|--------------------------|-----------------------|---------------|
|                                                  | Quality of Nursing                                    | Patient Safety        | Self-Care Ability        | Low frequency AE      |               |
|                                                  | Coefficient (p-value)                                 | Coefficient (p-value) | Coefficient (p-value)    | Coefficient (p-value) |               |
| <b>Process measures</b>                          | <i>Patient safety management</i>                      | 0.09 (<0.001)         | 0.19 (<0.001)            | 0.13 (<0.001)         | 0.06 (<0.001) |
|                                                  | <i>Staff adequacy</i>                                 | 0.12 (<0.001)         | 0.12 (<0.001)            | 0.10 (<0.001)         | 0.04 (<0.001) |
|                                                  | <i>Nurse-physician relation</i>                       | 0.06 (0.003)          | 0.07 (<0.001)            | 0.08(0.006)           |               |
|                                                  | <i>Education and career</i>                           |                       |                          |                       |               |
|                                                  | <i>Quality system</i>                                 | 0.25 (<0.001)         | 0.18 (<0.001)            | 0.21 (<0.001)         | 0.09 (<0.001) |
|                                                  | <i>Nurse participation</i>                            | -0.04 (0.028)         |                          |                       |               |
|                                                  | <i>Ward leadership</i>                                | 0.05 (0.011)          |                          |                       | -0.03 (0.008) |
| <b>Structure measures</b>                        | <i>Local university hospital</i>                      |                       |                          |                       | -3.08 (0.008) |
|                                                  | <i>Regional university hospital</i>                   | 3.57 (0.003)          | 1.89 (0.024)             | 1.48 (<0.375)         |               |
|                                                  | <i>Nurse-patient ratio-R</i>                          |                       |                          | 0.21 (0.127)          |               |
|                                                  | <i>Physician-patient ratio-R</i>                      |                       |                          | -0.28 (0.290)         |               |
|                                                  | <i>Bed occupancy-R</i>                                |                       | 0.00 (0.955)             | -0.25 (0.055)         | -0.09 (0.127) |
|                                                  | <i>Index for patient mix-R</i>                        | 0.01 (0.861)          |                          | 0.10 (0.415)          |               |
|                                                  | <i>Nurse experience-R</i>                             |                       |                          | -0.77(0.071)          | 0.33 (0.051)  |
|                                                  | <i>Hospital size-R</i>                                |                       |                          | -0.02 (0.533)         |               |
|                                                  | <i>Medical department</i>                             | 0.23 (0.769)          | -1.12 (0.039)            | -5.89 (<0.001)        |               |
| <b>Interactions</b>                              | <i>Index for patient mix-R * Medical department</i>   | 0.14 (0.114)          |                          | -0.28 (0.032)         |               |
|                                                  | <i>Nurse-patient ratio-R * nurse experience-R</i>     |                       |                          | 0.16 (0.013)          |               |
|                                                  | <i>Physician-patient ratio-R * nurse experience-R</i> |                       |                          | -0.28 (0.066)         |               |
|                                                  | <i>Bed occupancy-R * Medical department</i>           |                       | -0.10 (0.227)            |                       |               |
|                                                  | <b>Intra class correlation</b>                        |                       |                          |                       |               |
| ICC(percent)/design effect (hospital ward level) | 5.68/1.69                                             | 2.46/1.30             | 5.35/1.65                | 8.64/2.05             |               |
| ICC(percent)/design effect (hospital level)      | 0.56/1.47                                             | 0.72/1.61             | 0.22/1.19                | 0.74/1.62             |               |

[Intraclass correlation coefficients and design effects for each outcome are presented in table 5.](#)

The multivariate multilevel model showed that nurses' reports of work-related outcome measures; Quality of Nursing, and Patient Safety, were associated with four of the

1  
2  
3 organizational process measures; *patient safety management*, *staff adequacy*, *nurse-physician*  
4 *relation*, and *quality system* (table 5). Small but significant coefficients were found for  
5  
6 associations between Quality of Nursing and *nurse participation* (negatively) and *ward*  
7 *leadership* (positively). Working ~~in~~ at a *regional university hospital* rather than at a local  
8  
9 hospital was associated with both work-related outcome measures. Nurses affiliated to  
10  
11 *medical departments* gave lower ratings of Patient Safety than nurses working in surgical  
12  
13 departments.

14  
15  
16  
17  
18  
19 The patient-related outcome measures; Self-Care Ability, and Low frequency AE, were  
20  
21 associated with the organizational process measures *patient safety management*, *staff*  
22 *adequacy*, and *quality system*. Self-Care Ability was associated with *Nurse-physician relation*  
23  
24 (positively), and Low frequency AE was associated with *ward leadership* (negatively). Nurses  
25  
26 working in a *medical department* reported poorer Self-Care Ability. Nurses working a *local*  
27  
28 *university hospital* rather than a local hospital reported higher frequency of adverse events  
29  
30 (reduced Low frequency AE). The interactions included in the final model showed that *index*  
31  
32 *for patient mix* reduced the negative effect of *medical department* on Self-Care Ability. High  
33  
34 *nurse experience* per hospital increased the effect of *nurse-patient ratio* on Self-Care Ability.  
35  
36  
37  
38  
39 Except for *medical department* none of the main effects involved in the interactions were  
40  
41 significant.  
42  
43

## 44 Discussion

### 45 Main findings

46  
47  
48  
49  
50 Organisational process variables; *quality system*, *patient safety management*, *staff adequacy*  
51  
52 *and nurse-physician relation* were associated with nurse-reported work- and patient- related  
53  
54 outcomes. Not all process variables were associated with the outcomes. The organisational  
55  
56  
57  
58  
59  
60

1  
2  
3 structure variables *medical department* and *hospital type* were associated with some of the  
4  
5 nurse-reported outcomes.  
6  
7

### 8 9 Strengths and limitations

10  
11  
12 This study is based on data from one of the largest nurse surveys performed in Norway, and  
13  
14 includes almost all Norwegian hospitals with more than 85 beds. Norwegian nurses give their  
15  
16 workplaces better ratings of work environment and patient safety, and nurse-patient ratios are  
17  
18 high compared to other countries<sup>11</sup>. The good performance of Norwegian hospitals as  
19  
20 assessed by nurses makes it of particular interest to study the organisational design.  
21  
22

23  
24 Questions related to cross-sectional survey design are often addressed towards the inadequacy  
25  
26 to prove causality. However, the intention of our study was not to add evidence of this kind,  
27  
28 but to describe associations between nurses' perceptions of work environment and their  
29  
30 assessments of patient safety and quality of nursing. We have not made statistical controls to  
31  
32 mitigate the risk of common method bias as the value of this is questioned<sup>47-51</sup>. The method  
33  
34 for identifying the five-factor structure of nursing work index has been criticised, but is one of  
35  
36 several ways to identify factor structure<sup>52</sup>. Internal consistency has been tested for both scales,  
37  
38 and was higher for the six-factor structure identified in the Norwegian data and provided a  
39  
40 nuanced description of work environment and is likely better adapted to a Norwegian context  
41  
42  
43  
44  
45  
46  
47  
48  
49  
50  
51  
52  
53  
54  
55  
56  
57  
58  
59  
60  
36 38. The questionnaires were distributed through the nurses' union representatives, and we  
have not been able to control whether loyalty to NNO has influenced the results. The age  
distribution of our sample is corresponding with studies from similar populations in Norway,  
<sup>53</sup>. The difference in age from nurses in the NNO memberregister may be explained by  
exclusion of nurses in leader positions and part-time positions. Nurses' practice environments  
are complex and cannot be fully covered by a questionnaire, but overall the nursing work  
index is characterised as a "promising instrument"<sup>52,54</sup>. However, NWI is developed to

1  
2  
3 evaluate nurse-reported job outcomes, and the applicability of the instrument to patient safety  
4  
5 might be uncertain<sup>55</sup>. Statistics Norway and The Norwegian Directorate of Health are well-  
6  
7 established registers with complete coverage. The high quality of their data collection has  
8  
9 minimized the risk of inaccuracy of organisational structure variables and ensured the  
10  
11 comparability between hospitals.  
12

### 13 14 15 Organisational process measures

16  
17  
18 Educational level has been associated with risk-adjusted patient mortality and failure to rescue  
19  
20 within 30 days of admission<sup>56,57</sup>. Even though all Norwegian nurses hold a bachelor degree,  
21  
22 we expected that *education and career* was associated with some of the outcome measures,  
23  
24 but this was not the case. However, the association between *quality system*, involving issues  
25  
26 as training for newly hired and continuity of nursing, and work- and patient- related outcomes  
27  
28 indicate that integrated training programmes may be more important for patient safety and  
29  
30 quality of nursing<sup>57</sup>. The subscale *quality system* also represents continuous processes such as  
31  
32 presence of quality control programmes, systems for documentation, and nursing versus  
33  
34 medical orientation. These findings are supported in studies showing that quality programmes  
35  
36 influence health care workers attitudes and increase improvement events<sup>58-61</sup>. The existence of  
37  
38 standards, infrastructure and quality systems contribute to expectations and predictability for  
39  
40 the health professionals and maximize their efforts to avoid patient harm<sup>1,9,62</sup>.  
41  
42

43  
44 In our study *Ward leadership* was inconsistently associated with the outcomes in this study.

45  
46 However, a positive association with *patient safety management* supports findings from  
47  
48 studies that emphasise nurse leadership and a management that prioritizes patient safety<sup>10,40</sup>  
49  
50 <sup>63,64</sup>. In a recent study the authors found that engaged leadership strengthened both  
51  
52 communication and teamwork and that these qualities of the organisation enhanced patient  
53  
54 safety<sup>65</sup>. Communication and collegial discussions are important aspects to streamline  
55  
56 workflow and procedures to ensure patient safety, and serve as sources for professional  
57  
58  
59  
60

1  
2  
3 development<sup>66,67</sup>. The association between good nurse-physician relation and high quality of  
4  
5 care from other studies was supported in our findings<sup>68-71</sup>. The channels for communicating  
6  
7 results from performance measurements and other patient safety messages require  
8  
9 engagement from leaders on all levels, and should probably be customized to preferences of  
10  
11 the targeted health care profession.  
12

13  
14  
15  
16  
17  
18 *Staff adequacy* represent nurses' assessments of the possibility to get the work done, provide  
19  
20 quality of care, and discuss problems related to care with colleagues. Processes that ensure  
21  
22 adequate and targeted resource allocation may contribute to reduced length of stay, increase in  
23  
24 ambulatory activity, as well as ensuring right competence at the right place and time<sup>72 73</sup>.  
25  
26 Associations between staff ratios and patient outcomes such as failure to rescue, unplanned  
27  
28 extubation, cardiac arrest, nosocomial infections, and risk-adjusted mortality have been found  
29  
30 in several studies, indicating that staff levels are related to quality and patient safety<sup>15,19,21,74-</sup>  
31  
32 <sup>77</sup>. Corresponding results have been shown in studies with nurse-reported outcome measures,  
33  
34 but was not confirmed by our study<sup>75-77</sup>. A possible reason for this is that nurse-patient ratios  
35  
36 are high in Norway and that Norwegian nurses perceive work environment better than nurses  
37  
38 in other countries<sup>11</sup>. This may indicate that passing a threshold for staff levels, challenges  
39  
40 related to quality, and patient safety could be met on an organizational level<sup>11,23,78</sup>.  
41  
42  
43  
44  
45  
46  
47

#### 48 Organisational structure measures

49  
50  
51 Few organizational structure measures were significantly associated with outcome variables  
52  
53 when hospital and hospital ward was introduced as levels in the analysis. Hence, when  
54  
55 affiliation to regional university hospitals remained significant, it may as well be explained by  
56  
57 a strong common perception of the hospital performance as of *hospital type*. *Regional*  
58  
59  
60

1  
2  
3 *university hospital* was not associated with nurse-reported patient-related outcomes implying  
4  
5 that nurses' perception of quality and safety may be good despite the risk for complications  
6  
7 among patients in these hospitals. Associations between hospital type and patient safety  
8  
9 indicators are inconsistently reported by other authors that suggest that features other than  
10  
11 hospital type are more important for patient outcomes<sup>6,79,80</sup>.

12  
13  
14 The negative association between Low frequency AE and *local university hospital* might  
15  
16 confirm the assumption that common perception is a more decisive factor than hospital type.  
17  
18 However, because of the small number of hospitals in this group, conditions in a single  
19  
20 hospital might have influenced the results. Correlation on hospital and hospital ward levels  
21  
22 were highest for Low frequency AE, indicating a stronger correlation for this outcome on  
23  
24 these levels, and we cannot rule out that our findings are related to resources, patients'  
25  
26 severity and nurses' perceptions of risk of complications<sup>6</sup>. We found that nurses working in  
27  
28 *medical departments* gave poorer ratings of patients' self care ability and that *medical*  
29  
30 *department* interacted with *index for patient mix*. We lack information about patients' severity  
31  
32 and DRG-weights on departmental level, but the complexity in diseases and comorbidity  
33  
34 among elderly patients' may explain this result if the majority of them are admitted to medical  
35  
36 departments. These consideration do not explain why being affiliated to a *medical department*  
37  
38 was associated with nurse-reported Patient safety, but may indicate that patient safety  
39  
40 interventions are easier to apply and make visible in surgical departments as the procedures  
41  
42 are more standardized<sup>81</sup>.

#### 43 44 45 46 47 48 Final remarks

49  
50  
51 The agreement of respondents within organisational levels (ICCs) was in accordance with  
52  
53 similar studies reviewed by Park and Lake<sup>82</sup>. The culture of a group is formed by shared  
54  
55  
56  
57  
58  
59  
60

1  
2  
3 perceptions, thoughts and emotions, and the dependency of the observations at ward level  
4  
5 may be explained by such phenomena<sup>39</sup>.  
6  
7

8 Organizational structure variables included in our study have minor impact on how nurses  
9  
10 perceive work- and patient-related outcomes. However, the organizational process variables  
11  
12 consistently related to all outcomes measures indicated that there is a considerable potential in  
13  
14 addressing organizational design in improvement of patient safety and quality of care. This  
15  
16 study makes a contribution to knowledge about how interventions should be targeted towards  
17  
18 organisational processes in patient safety work~~nurses as one major micro-system of the~~  
19  
20 organization. Further research should also address organisational processes relevant for other  
21  
22 professions.  
23  
24

25  
26  
27 **Ethical approvals:** The method of data collection and handling was approved by the Data  
28  
29 Protection Official for Research.  
30  
31

32 **Acknowledgements:** The authors would like to thank all Norwegian nurses that responded  
33  
34 on the nurse survey.  
35  
36

37 **Competing interests:** None.  
38  
39

40 **Funding:** Data were collected by Norwegian Nurses' Organisation and Norwegian  
41  
42 Knowledge Centre for the Health Services in collaboration. Christine Tvedt was supported by  
43  
44 a grant from Norwegian Nurses' organisation.  
45  
46  
47

48 **Data sharing statement:** The data set is available at The Norwegian Knowledge Centre for  
49  
50 the Health Services, and requests should be addressed by emailing [cht@nokc.no](mailto:cht@nokc.no).  
51  
52  
53  
54  
55

56 Reference List  
57  
58  
59  
60



- 1 Committee on Quality of Health Care in America. Crossing the quality chasm : a new health system for the 21st century. Washington, D.C.: National Academy Press; 2001.
- 2 Wong Jiahui, Beglaryan Hasmik. Strategies for Hospitals to Improve Patient Safety: A Review of the Research. 2004. The Change Foundation.  
Ref Type: Report
- 3 Leape L, Berwick D, Clancy C et al. Transforming healthcare: a safety imperative. *Qual Saf Health Care* 2009; 18(6):424-428.
- 4 Hearld LR, Alexander JA, Fraser I et al. Review: how do hospital organizational structure and processes affect quality of care?: a critical review of research methods. *Med Care Res Rev* 2008; 65(3):259-299.
- 5 Zohar D. Thirty years of safety climate research: reflections and future directions. *Accid Anal Prev* 2010; 42(5):1517-1522.
- 6 Rivard PE, Elixhauser A, Christiansen CL et al. Testing the association between patient safety indicators and hospital structural characteristics in VA and nonfederal hospitals. *Med Care Res Rev* 2010; 67(3):321-341.
- 7 Battles JB, Lilford RJ. Organizing patient safety research to identify risks and hazards. *Qual Saf Health Care* 2003; 12 Suppl 2:ii2-ii7.
- 8 Donabedian A. An introduction to quality assurance in health care. New York: Oxford University Press; 2003.
- 9 Battles JB. Quality and safety by design. *Qual Saf Health Care* 2006; 15 Suppl 1:i1-i3.
- 10 Cummings G. The call for leadership to influence patient outcomes. *Nurs Leadersh (Tor Ont )* 2011; 24(2):22-25.
- 11 Aiken LH, Sermeus W, Van den Heede K et al. Patient safety, satisfaction, and quality of hospital care: cross sectional surveys of nurses and patients in 12 countries in Europe and the United States. *BMJ* 2012; 344:e1717.
- 12 Wallace JE, Lemaire JB, Ghali WA. Physician wellness: a missing quality indicator. *Lancet* 2009; 374(9702):1714-1721.
- 13 Hickam DH, Severance S, Feldstein A et al. The effect of health care working conditions on patient safety. *Evid Rep Technol Assess (Summ )* 2003;(74):1-3.
- 14 Grol R. Changing physicians' competence and performance: finding the balance between the individual and the organization. *J Contin Educ Health Prof* 2002; 22(4):244-251.
- 15 Stone PW, Mooney-Kane C, Larson EL et al. Nurse Working Conditions and Patient Safety Outcomes. *Med Care* 2007; 45(6):571-578.
- 16 Cummings GG, Midodzi WK, Wong CA et al. The contribution of hospital nursing leadership styles to 30-day patient mortality. *Nurs Res* 2010; 59(5):331-339.



- 17 Aiken LH, Clarke SP, Sloane DM et al. Effects of hospital care environment on patient mortality and nurse outcomes. *J Nurs Adm* 2008; 39(7-8 Suppl):S45-S51.
- 18 Estabrooks CA, Midodzi WK, Cummings GG et al. The impact of hospital nursing characteristics on 30-day mortality. *Nurs Res* 2005; 54(2):74-84.
- 19 Needleman J, Buerhaus P, Pankratz VS et al. Nurse staffing and inpatient hospital mortality. *N Engl J Med* 2011; 364(11):1037-1045.
- 20 Blegen MA, Goode CJ, Reed L. Nurse staffing and patient outcomes. *Nurs Res* 1998; 47(1):43-50.
- 21 Kane RL, Shamliyan TA, Mueller C et al. The Association of Registered Nurse Staffing Levels and Patient Outcomes: Systematic Review and Meta-Analysis. *Med Care* 2007; 45(12):1195-1204.
- 22 Singer SJ, Gaba DM, Falwell A et al. Patient safety climate in 92 US hospitals: differences by work area and discipline. *Med Care* 2009; 47(1):23-31.
- 23 Carayon P, Schoofs HA, Karsh BT et al. Work system design for patient safety: the SEIPS model. *Qual Saf Health Care* 2006; 15 Suppl 1:i50-i58.
- 24 Westbrook MT, Braithwaite J, Travaglia JF et al. Promoting safety: longer-term responses of three health professional groups to a safety improvement programme. *Int J Health Care Qual Assur* 2007; 20(7):555-571.
- 25 Listyowardojo TA, Nap RE, Johnson A. Variations in hospital worker perceptions of safety culture. *Int J Qual Health Care* 2012; 24(1):9-15.
- 26 Gallego B, Westbrook MT, Dunn AG et al. Investigating patient safety culture across a health system: multilevel modelling of differences associated with service types and staff demographics. *Int J Qual Health Care* 2012.
- 27 Travaglia JF, Westbrook MT, Braithwaite J. Implementation of a patient safety incident management system as viewed by doctors, nurses and allied health professionals. *Health (London)* 2009; 13(3):277-296.
- 28 McHugh MD, Stimpfel AW. Nurse reported quality of care: A measure of hospital quality. *Res Nurs Health* 2012.
- 29 Shang J, Friese CR, Wu E et al. Nursing Practice Environment and Outcomes for Oncology Nursing. *Cancer Nurs* 2012.
- 30 Van BP, Clarke S, Roelant E et al. Impacts of unit-level nurse practice environment and burnout on nurse-reported outcomes: a multilevel modelling approach. *J Clin Nurs* 2010; 19(11-12):1664-1674.
- 31 Ausserhofer D, Schubert M, Engberg S et al. Nurse-reported patient safety climate in Swiss hospitals: a descriptive-explorative substudy of the Swiss RN4CAST study. *Swiss Med Wkly* 2012; 142:0.
- 32 Aiken LH, Clarke SP, Sloane DM et al. Nurses' reports on hospital care in five countries. *Health Aff (Millwood)* 2001; 20(3):43-53.

- 1  
2  
3 33 Aiken LH, Clarke SP, Sloane DM. Hospital staffing, organization, and quality of care: cross-  
4 national findings. *Int J Qual Health Care* 2002; 14(1):5-13.  
5  
6 34 Braithwaite J, Westbrook MT, Robinson M et al. Improving patient safety: the comparative  
7 views of patient-safety specialists, workforce staff and managers. *BMJ Qual Saf* 2011;  
8 20(5):424-431.  
9  
10 35 Warren CR, Landis RS. One is the loneliest number: A meta-analytic investigation on single-item  
11 measure fidelity. *Ergometrika* 2007; 4(1):32-35.  
12  
13 36 Lake ET. Development of the practice environment scale of the Nursing Work Index. *Res Nurs*  
14 *Health* 2002; 25(3):176-188.  
15  
16 37 Blegen MA, Gearhart S, O'Brien R et al. AHRQ's hospital survey on patient safety culture:  
17 psychometric analyses. *J Patient Saf* 2009; 5(3):139-144.  
18  
19 38 Sjetne IS, Tvedt C, Squires A. Måleinstrumentet "The Nursing Work Index-Revised" -  
20 oversettelse og utprøving av en norsk versjon. ["The Nursing Work Index-Revised" -Instrument  
21 translation and assessment of a Norwegian version]. *Sykepleien Forskning* 2011; 6(4):358-365.  
22  
23 39 Schein EH. Organizational culture and leadership. San Francisco: Jossey-Bass; 2004.  
24  
25 40 Wong CA, Cummings GG. The relationship between nursing leadership and patient outcomes: a  
26 systematic review. *J Nurs Manag* 2007; 15(5):508-521.  
27  
28 41 Huseby, B (red). Specialist health care services 2009 (SAMDATA). 2010. Oslo, The Norwegian  
29 Directorate of Health. 978.  
30 Ref Type: Report  
31  
32 42 Statistics Norway. Statbank. 2012 Available from:  
33 URL:<http://statbank.ssb.no/statistikkbanken/>  
34  
35 43 West E. Management matters: the link between hospital organisation and quality of patient  
36 care. *Qual Health Care* 2001; 10(1):40-48.  
37  
38 44 Taylor SL, Dy S, Foy R et al. What context features might be important determinants of the  
39 effectiveness of patient safety practice interventions? *BMJ Qual Saf* 2011; 20(7):611-617.  
40  
41 45 Dy SM, Taylor SL, Carr LH et al. A framework for classifying patient safety practices: results  
42 from an expert consensus process. *BMJ Qual Saf* 2011; 20(7):618-624.  
43  
44 46 Kramer M, Schmalenberg C, Brewer BB et al. Accurate assessment of clinical nurses' work  
45 environments: response rate needed. *Res Nurs Health* 2009; 32(2):229-240.  
46  
47 47 Spector PE, Brannick MT. Common Method Issues: An Introduction to the Feature Topic in  
48 Organizational Research Methods. *Organizational Research Methods* 2010; 13(3):403-406.  
49  
50 48 Conway JM, Lance CE. What Reviewers Should Expect from Authors Regarding Common  
51 Method Bias in Organizational Research. *Journal of Business and Psychology (J Bus Psychol)*  
52 2010; 25:325-334.  
53  
54 49 Brannick MT, Chan D, Conway JM et al. What is Method Variance and How Can We Cope With  
55 It? A Panel Discussion. *Organizational Research Methods* 2010; 13(3):407-420.  
56  
57  
58  
59  
60

- 1  
2  
3 50 Lance CE, Dawson P, Birkelbach D et al. Method Effects, Measurement Error, and Substantive  
4 Conclusions. *Organizational Research Methods* 2011; 13(3):435-455.  
5  
6 51 Siemsen E, Roth A, Oliveira P. Common Method Bias in Regression Models With Linear,  
7 Quadratic, and Interaction Effects. *Organizational Research Methods* 2010; 13(3):456-476.  
8  
9 52 Cummings GG, Hayduk L, Estabrooks CA. Is the Nursing Work Index Measuring Up?: Moving  
10 Beyond Estimating Reliability to Testing Validity. *Nurs Res* 2006; 55(2):82-93.  
11  
12 53 Sjetne IS, Veenstra M, Ellefsen B et al. Service quality in hospital wards with different nursing  
13 organization: nurses' ratings. *J Adv Nurs* 2009; 65(2):325-336.  
14  
15 54 Bonnetterre V, Liaudy S, Chatellier G et al. Reliability, validity, and health issues arising from  
16 questionnaires used to measure Psychosocial and Organizational Work Factors (POWFs) among  
17 hospital nurses: a critical review. *J Nurs Meas* 2008; 16(3):207-230.  
18  
19 55 Zohar D. Safety climate in industrial organizations: theoretical and applied implications. *J Appl*  
20 *Psychol* 1980; 65(1):96-102.  
21  
22 56 Aiken LH, Clarke SP, Cheung RB et al. Educational levels of hospital nurses and surgical patient  
23 mortality. *JAMA* 2003; 290(12):1617-1623.  
24  
25 57 McAlearney AS, Garman AN, Song PH et al. High-performance work systems in health care  
26 management, part 2: qualitative evidence from five case studies. *Health Care Manage Rev*  
27 2011; 36(3):214-226.  
28  
29 58 Haley RW, Quade D, Freeman HE et al. The SENIC Project. Study on the efficacy of nosocomial  
30 infection control (SENIC Project). Summary of study design. *Am J Epidemiol* 1980; 111(5):472-  
31 485.  
32  
33 59 Naveh E, Stem Z. How quality improvement programs can affect general hospital performance.  
34 *Int J Health Care Qual Assur Inc Leadersh Health Serv* 2005; 18(4-5):249-270.  
35  
36 60 Maguerez G, Erbault M, Terra JL et al. Evaluation of 60 continuous quality improvement  
37 projects in French hospitals. *Int J Qual Health Care* 2001; 13(2):89-97.  
38  
39 61 Tvedt C, Bukholm G. Healthcare workers' self-reported effect of an interventional programme  
40 on knowledge and behaviour related to infection control. *Qual Saf Health Care* 2010; 19(6):e7.  
41  
42 62 Kohn, L.T, Corrigan JM, Donaldson MSe. To err is human : building a safer health system.  
43 Washington, D.C.: National Academy Press; 2000.  
44  
45 63 Goeschel CA, Wachter RM, Pronovost PJ. Responsibility for quality improvement and patient  
46 safety: hospital board and medical staff leadership challenges. *Chest* 2010; 138(1):171-178.  
47  
48 64 Conway J. Getting boards on board: engaging governing boards in quality and safety. *Jt Comm J*  
49 *Qual Patient Saf* 2008; 34(4):214-220.  
50  
51 65 Castner J, Foltz-Ramos K, Schwartz DG et al. A Leadership Challenge: Staff Nurse Perceptions  
52 After an Organizational TeamSTEPPS Initiative. *J Nurs Adm* 2012; 42(10):467-472.  
53  
54 66 Quick J. Modern perioperative teamwork: an opportunity for interprofessional learning. *J*  
55 *Perioper Pract* 2011; 21(11):387-390.  
56  
57  
58  
59  
60

- 1  
2  
3 67 West P, Sculli G, Fore A et al. Improving Patient Safety and Optimizing Nursing Teamwork Using  
4 Crew Resource Management Techniques. *J Nurs Adm* 2012; 42(1):15-20.  
5  
6 68 Manser T. Teamwork and patient safety in dynamic domains of healthcare: a review of the  
7 literature. *Acta Anaesthesiol Scand* 2009; 53(2):143-151.  
8  
9 69 Auerbach AD, Sehgal NL, Blegen MA et al. Effects of a multicentre teamwork and  
10 communication programme on patient outcomes: results from the Triad for Optimal Patient  
11 Safety (TOPS) project. *BMJ Qual Saf* 2011.  
12  
13 70 Baker DP, Day R, Salas E. Teamwork as an essential component of high-reliability organizations.  
14 *Health Serv Res* 2006; 41(4 Pt 2):1576-1598.  
15  
16 71 Schmalenberg C, Kramer M. Nurse-physician relationships in hospitals: 20,000 nurses tell their  
17 story. *Crit Care Nurse* 2009; 29(1):74-83.  
18  
19 72 Christianson MK, Sutcliffe KM, Miller MA et al. Becoming a high reliability organization. *Crit*  
20 *Care* 2011; 15(6):314.  
21  
22 73 Allen D, Rixson L. How has the impact of 'care pathway technologies' on service integration in  
23 stroke care been measured and what is the strength of the evidence to support their  
24 effectiveness in this respect? *Int J Evid Based Healthc* 2008; 6(1):78-110.  
25  
26 74 Pronovost P, Needham D, Berenholtz S et al. An intervention to decrease catheter-related  
27 bloodstream infections in the ICU. *N Engl J Med* 2006; 355(26):2725-2732.  
28  
29 75 Tervo-Heikkinen T, Kiviniemi V, Partanen P et al. Nurse staffing levels and nursing outcomes: a  
30 Bayesian analysis of Finnish-registered nurse survey data. *J Nurs Manag* 2009; 17(8):986-993.  
31  
32 76 Djukic M, Kovner CT, Brewer CS et al. Work environment factors other than staffing associated  
33 with nurses' ratings of patient care quality. *Health Care Manage Rev* 2011.  
34  
35 77 Gunnarsdottir S, Clarke SP, Rafferty AM et al. Front-line management, staffing and nurse-  
36 doctor relationships as predictors of nurse and patient outcomes. A survey of Icelandic hospital  
37 nurses. *Int J Nurs Stud* 2007.  
38  
39 78 Shekelle PG, Pronovost PJ, Wachter RM et al. Advancing the science of patient safety. *Ann*  
40 *Intern Med* 2011; 154(10):693-696.  
41  
42 79 Thornlow DK, Stukenborg GJ. The association between hospital characteristics and rates of  
43 preventable complications and adverse events. *Med Care* 2006; 44(3):265-269.  
44  
45 80 Sjetne IS, Veenstra M, Stavem K. The effect of hospital size and teaching status on patient  
46 experiences with hospital care: a multilevel analysis. *Med Care* 2007; 45(3):252-258.  
47  
48 81 El-Jardali F, Dimassi H, Jamal D et al. Predictors and outcomes of patient safety culture in  
49 hospitals. *BMC Health Serv Res* 2011; 11:45.  
50  
51 82 Park S, Lake ET. Multilevel modeling of a clustered continuous outcome: nurses' work hours  
52 and burnout. *Nurs Res* 2005; 54(6):406-413.  
53  
54  
55  
56  
57  
58  
59  
60

1  
2  
3  
4  
5  
6  
7  
8  
9  
10  
11  
12  
13  
14  
15  
16  
17  
18  
19  
20  
21  
22  
23  
24  
25  
26  
27  
28  
29  
30  
31  
32  
33  
34  
35  
36  
37  
38  
39  
40  
41  
42  
43  
44  
45  
46  
47  
48  
49  
50  
51  
52  
53  
54  
55  
56  
57  
58  
59  
60

For peer review only

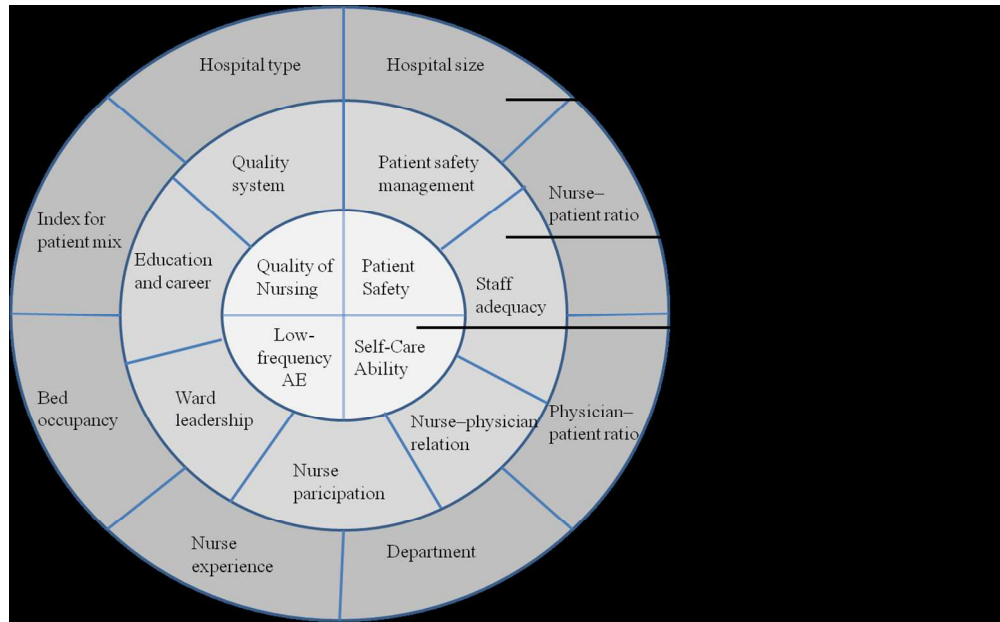

Modification of Battles' model to illustrate the understanding of structure, process and outcome in this context.

246x151mm (150 x 150 DPI)

Review only

1  
2  
3  
4  
5  
6  
7  
8  
9  
10  
11  
12  
13  
14  
15  
16  
17  
18  
19  
20  
21  
22  
23  
24  
25  
26  
27  
28  
29  
30  
31  
32  
33  
34  
35  
36  
37  
38  
39  
40  
41  
42  
43  
44  
45  
46  
47  
48  
49  
50  
51  
52  
53  
54  
55  
56  
57  
58  
59  
60

| Items of nursing work index                                                              | Six-factor structure of Norwegian dataset |                                         |                |                 |                | Five-factor structure of Lake et al. |                                         |                                         |                                                          |                                |                                     |
|------------------------------------------------------------------------------------------|-------------------------------------------|-----------------------------------------|----------------|-----------------|----------------|--------------------------------------|-----------------------------------------|-----------------------------------------|----------------------------------------------------------|--------------------------------|-------------------------------------|
|                                                                                          | Education and career possibilities        | Nurse participation in hospital affairs | Quality system | Ward leadership | Staff adequacy | Nurse physician relation             | Nurse Participation in Hospital Affairs | Nursing Foundations for Quality of Care | Nurse Manager Ability, Leadership, and Support of Nurses | Staffing and Resource Adequacy | Collegial Nurse-Physician Relations |
| 1. Årbeidstid i tillegg til vanlig arbeidstid                                            |                                           |                                         |                |                 |                |                                      |                                         |                                         |                                                          |                                |                                     |
| 2. Årbeidstid i tillegg til vanlig arbeidstid                                            | Ekstremt lite                             |                                         |                |                 |                |                                      |                                         |                                         |                                                          |                                |                                     |
| 3. Årbeidstid i tillegg til vanlig arbeidstid                                            | Ekstremt lite                             |                                         |                |                 |                |                                      |                                         |                                         |                                                          |                                |                                     |
| 4. Årbeidstid i tillegg til vanlig arbeidstid                                            | Ekstremt lite                             |                                         |                |                 |                |                                      |                                         |                                         |                                                          |                                |                                     |
| 5. Årbeidstid i tillegg til vanlig arbeidstid                                            | Ekstremt lite                             |                                         |                |                 |                |                                      |                                         |                                         |                                                          |                                |                                     |
| 6. Årbeidstid i tillegg til vanlig arbeidstid                                            | Ekstremt lite                             |                                         |                |                 |                |                                      |                                         |                                         |                                                          |                                |                                     |
| 7. Årbeidstid i tillegg til vanlig arbeidstid                                            | Ekstremt lite                             |                                         |                |                 |                |                                      |                                         |                                         |                                                          |                                |                                     |
| 8. Årbeidstid i tillegg til vanlig arbeidstid                                            | Ekstremt lite                             |                                         |                |                 |                |                                      |                                         |                                         |                                                          |                                |                                     |
| 9. Årbeidstid i tillegg til vanlig arbeidstid                                            | Ekstremt lite                             |                                         |                |                 |                |                                      |                                         |                                         |                                                          |                                |                                     |
| 10. Årbeidstid i tillegg til vanlig arbeidstid                                           | Ekstremt lite                             |                                         |                |                 |                |                                      |                                         |                                         |                                                          |                                |                                     |
| 11. Årbeidstid i tillegg til vanlig arbeidstid                                           | Ekstremt lite                             |                                         |                |                 |                |                                      |                                         |                                         |                                                          |                                |                                     |
| 12. Årbeidstid i tillegg til vanlig arbeidstid                                           | Ekstremt lite                             |                                         |                |                 |                |                                      |                                         |                                         |                                                          |                                |                                     |
| 13. Årbeidstid i tillegg til vanlig arbeidstid                                           | Ekstremt lite                             |                                         |                |                 |                |                                      |                                         |                                         |                                                          |                                |                                     |
| 14. Årbeidstid i tillegg til vanlig arbeidstid                                           | Ekstremt lite                             |                                         |                |                 |                |                                      |                                         |                                         |                                                          |                                |                                     |
| 15. Årbeidstid i tillegg til vanlig arbeidstid                                           | Ekstremt lite                             |                                         |                |                 |                |                                      |                                         |                                         |                                                          |                                |                                     |
| 16. Årbeidstid i tillegg til vanlig arbeidstid                                           | Ekstremt lite                             |                                         |                |                 |                |                                      |                                         |                                         |                                                          |                                |                                     |
| 17. Årbeidstid i tillegg til vanlig arbeidstid                                           | Ekstremt lite                             |                                         |                |                 |                |                                      |                                         |                                         |                                                          |                                |                                     |
| 18. Årbeidstid i tillegg til vanlig arbeidstid                                           | Ekstremt lite                             |                                         |                |                 |                |                                      |                                         |                                         |                                                          |                                |                                     |
| 19. Årbeidstid i tillegg til vanlig arbeidstid                                           | Ekstremt lite                             |                                         |                |                 |                |                                      |                                         |                                         |                                                          |                                |                                     |
| 20. Årbeidstid i tillegg til vanlig arbeidstid                                           | Ekstremt lite                             |                                         |                |                 |                |                                      |                                         |                                         |                                                          |                                |                                     |
| 21. Årbeidstid i tillegg til vanlig arbeidstid                                           | Ekstremt lite                             |                                         |                |                 |                |                                      |                                         |                                         |                                                          |                                |                                     |
| 22. Årbeidstid i tillegg til vanlig arbeidstid                                           | Ekstremt lite                             |                                         |                |                 |                |                                      |                                         |                                         |                                                          |                                |                                     |
| 23. Årbeidstid i tillegg til vanlig arbeidstid                                           | Ekstremt lite                             |                                         |                |                 |                |                                      |                                         |                                         |                                                          |                                |                                     |
| 24. Årbeidstid i tillegg til vanlig arbeidstid                                           | Ekstremt lite                             |                                         |                |                 |                |                                      |                                         |                                         |                                                          |                                |                                     |
| 25. Årbeidstid i tillegg til vanlig arbeidstid                                           | Ekstremt lite                             |                                         |                |                 |                |                                      |                                         |                                         |                                                          |                                |                                     |
| 26. Årbeidstid i tillegg til vanlig arbeidstid                                           | Ekstremt lite                             |                                         |                |                 |                |                                      |                                         |                                         |                                                          |                                |                                     |
| 27. Årbeidstid i tillegg til vanlig arbeidstid                                           | Ekstremt lite                             |                                         |                |                 |                |                                      |                                         |                                         |                                                          |                                |                                     |
| 28. Årbeidstid i tillegg til vanlig arbeidstid                                           | Ekstremt lite                             |                                         |                |                 |                |                                      |                                         |                                         |                                                          |                                |                                     |
| 29. Årbeidstid i tillegg til vanlig arbeidstid                                           | Ekstremt lite                             |                                         |                |                 |                |                                      |                                         |                                         |                                                          |                                |                                     |
| 30. Årbeidstid i tillegg til vanlig arbeidstid                                           | Ekstremt lite                             |                                         |                |                 |                |                                      |                                         |                                         |                                                          |                                |                                     |
| 31. Årbeidstid i tillegg til vanlig arbeidstid                                           | Ekstremt lite                             |                                         |                |                 |                |                                      |                                         |                                         |                                                          |                                |                                     |
| 32. Årbeidstid i tillegg til vanlig arbeidstid                                           | Ekstremt lite                             |                                         |                |                 |                |                                      |                                         |                                         |                                                          |                                |                                     |
| 33. Årbeidstid i tillegg til vanlig arbeidstid                                           | Ekstremt lite                             |                                         |                |                 |                |                                      |                                         |                                         |                                                          |                                |                                     |
| 34. Årbeidstid i tillegg til vanlig arbeidstid                                           | Ekstremt lite                             |                                         |                |                 |                |                                      |                                         |                                         |                                                          |                                |                                     |
| 35. Årbeidstid i tillegg til vanlig arbeidstid                                           | Ekstremt lite                             |                                         |                |                 |                |                                      |                                         |                                         |                                                          |                                |                                     |
| 36. Årbeidstid i tillegg til vanlig arbeidstid                                           | Ekstremt lite                             |                                         |                |                 |                |                                      |                                         |                                         |                                                          |                                |                                     |
| 37. Årbeidstid i tillegg til vanlig arbeidstid                                           | Ekstremt lite                             |                                         |                |                 |                |                                      |                                         |                                         |                                                          |                                |                                     |
| 38. Årbeidstid i tillegg til vanlig arbeidstid                                           | Ekstremt lite                             |                                         |                |                 |                |                                      |                                         |                                         |                                                          |                                |                                     |
| 39. Items of nursing work index that are not included in the Norwegians questionnaire or |                                           |                                         |                |                 |                |                                      |                                         |                                         |                                                          |                                |                                     |
| 40. Items of nursing work index that are not included in the Norwegians questionnaire or |                                           |                                         |                |                 |                |                                      |                                         |                                         |                                                          |                                |                                     |
| 41. Items of nursing work index that are not included in the Norwegians questionnaire or |                                           |                                         |                |                 |                |                                      |                                         |                                         |                                                          |                                |                                     |
| 42. Items of nursing work index that are not included in the Norwegians questionnaire or |                                           |                                         |                |                 |                |                                      |                                         |                                         |                                                          |                                |                                     |
| 43. Items of nursing work index that are not included in the Norwegians questionnaire or |                                           |                                         |                |                 |                |                                      |                                         |                                         |                                                          |                                |                                     |
| 44. Items of nursing work index that are not included in the Norwegians questionnaire or |                                           |                                         |                |                 |                |                                      |                                         |                                         |                                                          |                                |                                     |

Comparison of PES-NWI and subscales identified from Norwegian data  
232x276mm (96 x 96 DPI)



Table 4 Univariate linear regression (online-only)

|                                          | <b>Quality of nursing</b> | <b>Patient safety</b> | <b>Self-care ability</b> | <b>Absence of adverse events</b> |
|------------------------------------------|---------------------------|-----------------------|--------------------------|----------------------------------|
|                                          | Coefficient (p-value)     | Coefficient (p-value) | Coefficient (p-value)    | Coefficient (p-value)            |
| Patient safety management                | 0.29 (<0.001)             | 0.35 (<0.001)         | 0.30 (<0.001)            | 0.10 (<0.001)                    |
| Adequate staffing                        | 0.29 (<0.001)             | 0.28 (<0.001)         | 0.26 (<0.001)            | 0.10 (<0.001)                    |
| Nurse physician relation                 | 0.22 (<0.001)             | 0.22 (<0.001)         | 0.18 (<0.001)            | 0.06 (<0.001)                    |
| Education and career possibilities       | 0.24 (<0.001)             | 0.23 (<0.001)         | 0.20 (<0.001)            | 0.05 (<0.001)                    |
| Quality system                           | 0.43 (<0.001)             | 0.41 (<0.001)         | 0.40 (<0.001)            | 0.14 (<0.001)                    |
| Nurse representation in hospital affairs | 0.25 (<0.001)             | 0.25 (<0.001)         | 0.23 (<0.001)            | 0.06 (<0.001)                    |
| Ward leadership                          | 0.25 (<0.001)             | 0.25 (<0.001)         | 0.23 (<0.001)            | 0.04 (<0.001)                    |
| Nurse-patient ratio                      | 0.17 (<0.001)             | 0.17 (<0.001)         | 0.29 (<0.001)            | 0.05 (0.013)                     |
| Physician-patient ratio                  | 0.24 (<0.001)             | 0.15 (0.006)          | 0.29 (0.002)             | -0.21 (0.607)                    |
| Central hospital                         | -1.74 (0.045)             | -2.92 (<0.001)        | -0.69 (0.582)            | -2.98 (<0.001)                   |
| Regional hospital                        | 3.92 (<0.001)             | 2.33 (<0.001)         | 4.43 (<0.001)            | -0.28 (0.498)                    |
| Mean occupancy                           | -0.18 (<0.001)            | -0.17 (<0.001)        | -0.16 (<0.001)           | -0.16 (<0.001)                   |
| Index for patient mix                    | 0.17 (<0.001)             | 0.13 (<0.001)         | 0.13 (0.005)             | 0.02 (0.393)                     |
| Mean nurse experience                    | 0.39 (0.005)              | -0.44 (<0.001)        | -0.67 (0.001)            | 0.34 (<0.001)                    |
| Hospital size                            | -0.09 (0.419)             | -0.09 (<0.001)        | -0.11 (<0.001)           | -0.04 (<0.001)                   |
| Medical specialty (vs surgical)          | 1.26 (0.037)              | 0.24 (0.642)          | -4.46 (<0.001)           | -0.14 (0.719)                    |
